# Supplementary material for: Towards a multi-basin SWAT model for the migration of nutrients and pesticides to Puck Bay (Southern Baltic Sea)
Source: PeerJ. 2021 Feb 25;9:e10938. doi: 10.7717/peerj.10938 (PMC7916535; doi:10.7717/peerj.10938)
Supplement: Data S1 [file peerj-09-10938-s004.xls]

## Sheet: S3
2010	1	1	1489.78	0.13	1.21	0.18	0.83	0.02									Gizdepka loads [kg/month]											Błądzikowski loads [kg/month]											Płutnica loads [kg/month]
2010	1	2	628	0.03	0.38	0.06	0.16	0									Year	month	no. of stream	NO3	Pmin	Norg	Porg	NH4	NO2			year	month	no. of stream	NO3	Pmin	Norg	Porg	NH4	NO2			year	month	no. of stream	NO3	Pmin	Norg	Porg	NH4	NO2
																Precipitation				kg / month						runoff					kg / month											kg / month
2010	1	15	333.43	0	0	0	0	0								50.17	2011	1	13	705.85	63.56	3241.34	621.03	45.08	0	1515344		2011	1	10	435.09	30.18	1612.59	310.77	17.69	0			2011	1	1	1121.17	229.42	9185.92	1658.07	165.97	0.19
2010	1	16	274.19	0	0.01	0	0.02	0								82.44		2	13	953.07	79.2	4179.5	810.97	45.18	0	2221137			2	10	622.89	36.62	2066.15	399.81	17.56	0				2	1	1662.47	268.41	11166.9	2033.87	191.1	0.2
2010	1	17	176.15	0	0	0	0	0	2901.55	0.16	1.6	0.24	1.01	0.02		28.58		3	13	1390.82	20.9	924.22	175.68	17.71	0	1078600			3	10	1212.82	9.85	465.91	89.2	6.7	0				3	1	2972.97	79.12	2751.82	494.83	54.62	0.16
2010	2	1	1261.98	88.86	3041.75	544.12	70.11	0.23								25.48		4	13	535.78	3.96	121.08	23.11	4.52	0	511963			4	10	393.67	1.89	62.2	11.94	1.93	0				4	1	1200.72	19.68	415.77	72.9	15.72	0.13
2010	2	2	581.3	27.91	1582.1	291.39	15.1	0								48.47		5	13	298.75	4.67	67.6	17	5.36	0	220778			5	10	182.35	1.5	25.6	5.62	1.76	0				5	1	376.08	13.62	185.19	36.18	13.45	0.31
2010	2	3	494.05	24.67	1133.55	211.8	15.73	0.06								45.57		6	13	127.3	5.7	83.41	28.7	10.33	0	85805			6	10	86.86	1.75	18.27	6.05	2.23	0				6	1	654.28	12.11	129.88	37.08	14	0.63
2010	2	4	1161.64	83.72	2977.2	532.23	67.99	0.19								172.08		7	13	120.07	100.44	4233.67	978.74	118.13	0	1006898			7	10	31.49	36.4	1483.3	306.29	31.84	0				7	1	73.75	262.44	8754.59	1735.34	291.48	1.99
2010	2	5	344.54	16.62	910.04	172.08	11.77	0.03								135.81		8	13	1031.83	53.74	2229.3	409.85	81.14	0	698614			8	10	859.67	28.68	1130.39	208.49	29.37	0				8	1	1876.35	187.37	6562.47	1147.54	244.53	2.72
2010	2	6	159.4	7.62	541.51	103.75	5.58	0								55.86		9	13	496.54	41.78	2272.04	429.83	75.38	0	384582			9	10	410.53	27.13	1193.98	229.35	27.81	0				9	1	596.98	145.07	6568.76	1200.36	214.19	2.01
2010	2	7	338.24	4	66.34	12.87	0.26	0								26.18		10	13	281.9	1.9	41.56	7.57	3.43	0	162757			10	10	156.55	0.87	22.05	4.18	1.39	0				10	1	282.92	7.07	142.23	24.11	11.94	0.29
2010	2	8	187.41	3.73	208.49	39.21	0.41	0								23.08		11	13	69.59	7.08	268.19	49.47	9.86	0	134011			11	10	57.34	3.92	136.94	25.94	3.55	0				11	1	5.09	26.2	837.49	149.54	27.55	0.3
2010	2	9	139.8	4.8	259.01	49.83	2.48	0								63.96		12	13	241.57	14.94	495.44	92.51	14.32	0	395184			12	10	217.86	7.33	252.54	48.35	5.29	0				12	1	197.91	60.15	1606.29	281.76	50.53	0.32
2010	2	10	384.78	12.01	498.64	95.63	7.82	0								75.15	2012	1	13	959.51	20.51	692.34	130.75	14.99	0	1122180		2012	1	10	731.98	9.82	351.21	67.8	5.71	0			2012	1	1	940.73	81.99	2213.58	389.93	54.4	0.27
2010	2	11	969.32	15.43	414.2	70.9	7	0								66.16		2	13	987.71	48.3	2710.53	525.47	35.44	0	1613304			2	10	653.32	22.14	1312.38	254.67	13.29	0				2	1	1806.03	170.01	7664.92	1398.91	132.01	0.23
2010	2	12	2351.79	36.31	1410.48	206.17	29.72	0.07								27.48		3	13	1067.5	4.94	167.97	32.65	4.41	0	896746			3	10	712.65	2.01	83.56	16.1	1.77	0				3	1	2310.35	22.29	542.76	97.92	14.27	0.06
2010	2	13	863.08	25.32	1000.98	189.47	20.57	0								37.47		4	13	764	8.53	237.04	45.96	7.7	0	551474			4	10	419.6	3.52	110.78	21.16	2.81	0				4	1	1418.06	37.9	642.86	110.82	21.77	0.16
2010	2	14	1163.05	17.67	972.02	133.18	18.48	0								24.78		5	13	486.15	2.86	39.41	10.69	3.02	0	214715			5	10	241.48	0.92	14.53	3.43	1.18	0				5	1	937.65	8.5	109.28	22.83	8.29	0.22
2010	2	15	533.37	4.96	93.51	18.53	0.03	0								90.64		6	13	164.56	28.44	644.54	184.09	32.84	0	173936			6	10	80.02	7.58	155.07	40.13	6.21	0				6	1	412.04	60.98	1109.34	258.69	51.91	0.75
2010	2	16	167.82	3.47	115.09	22.21	1.3	0								156.99		7	13	123.95	131.06	5964.87	1511.18	171.38	0	1077011			7	10	46.58	42.72	1777.64	393.25	39.72	0				7	1	116.28	310.35	10641.7	2257.83	346.74	2.06
2010	2	17	159.94	1.78	91.8	18.56	0.04	0	11261.5	378.88	15316.7	2711.93	274.39	0.58		51.07		8	13	598.38	7.22	173.85	33.62	11.18	0	158019			8	10	302.67	3.56	85.54	15.96	4.25	0				8	1	776.66	23.88	474.42	82.83	29.41	0.61
2010	3	1	1001.02	135.48	4395.57	802.76	103.33	0.33								40.97		9	13	179.24	21.46	845.78	156.56	53.54	0	106934			9	10	123.78	13.77	448.67	85.2	19.28	0				9	1	230.96	75.44	2542.18	462.2	142.4	3.01
2010	3	2	543.36	43.08	2263.3	423	19.69	0								54.96		10	13	56.6	10.3	314.29	57.08	20.59	0	81265			10	10	30.54	5.49	163	30.55	7.81	0				10	1	55.35	36.54	944.94	164.3	59.81	1.15
2010	3	3	354.46	33.27	1701.15	322.79	18.31	0.09								93.34		11	13	315.68	51.45	2366.64	455.15	40.38	0	776281			11	10	150.7	25.22	1171.22	226.74	14.63	0				11	1	334.14	180.21	6825.03	1236.99	143.36	0.6
2010	3	4	897.05	128.63	4289.2	781.93	100.75	0.27								64.46		12	13	714.38	56.44	2938.42	567.52	40.61	0	1160767			12	10	376.64	28.6	1460.28	282.57	14.94	0				12	1	755.86	196.22	7435.24	1359.53	133.45	0.19
2010	3	5	257.59	20.85	1361.89	260.77	13.6	0.04								60.86	2013	1	13	1264.53	2.46	123.71	23.27	4.37	0	644008		2013	1	10	565.08	1.73	69.25	12.93	1.74	0			2013	1	1	1615.62	9.23	171.55	27.76	7.41	0.09
2010	3	6	115.96	8.82	807.01	156.46	6.55	0								56.56		2	13	1310.72	57.03	2567.35	502.53	33.75	0	1533660			2	10	596.21	26.98	1225.13	238.12	12.63	0				2	1	1518.75	184.24	6599.14	1206.25	109.76	0.2
2010	3	7	253.91	5.64	108.29	21.85	0.4	0								43.97		3	13	1310.34	12.28	542.72	105.6	10.24	0	1008132			3	10	730.52	5.9	267.36	51.99	3.86	0				3	1	2258.39	44.79	1671.67	303.31	34.33	0.08
2010	3	8	170.39	5.3	322.33	61.12	0.55	0								48.57		4	13	1129.55	50.34	2525.15	559.93	45.93	0	1167687			4	10	622.36	20.53	1016.92	208.03	14.78	0				4	1	1720.82	167.38	5770.88	1115.46	122.64	0.37
2010	3	9	110.98	6.14	394.88	75.9	2.84	0								75.05		5	13	1101.03	43.13	2407.01	640.14	69.84	0	889462			5	10	713.06	11.21	725.75	166.19	16.66	0				5	1	1421.39	101.85	4221.41	926.95	127.03	0.62
2010	3	10	413.85	14.93	759.73	146.57	11.15	0								53.36		6	13	495.55	33.3	2222.65	673.18	76.94	0	369815			6	10	276.91	11.07	520.54	142.74	13.55	0				6	1	1387.03	80.34	3110.92	794.5	100.85	0.95
2010	3	11	702.31	30.47	601.63	106.33	16.58	0								9.59		7	13	180.45	0.59	10.17	3.01	2.24	0	83976			7	10	126.78	0.26	3.11	0.71	0.92	0				7	1	215.78	1.45	10.04	2.26	2.79	0.35
2010	3	12	2690.5	60.91	1835.84	273.54	56.35	0.19								52.26		8	13	349.63	5.67	109.53	21.25	7.88	0	78218			8	10	125.91	2.36	52.28	9.76	3.1	0				8	1	393.93	18.54	353.08	61.65	23.55	0.74
2010	3	13	581.67	32.72	1578.29	305.95	30.58	0								94.24		9	13	591.22	62.17	2357.34	446.5	87.67	0	409929			9	10	716.95	39.25	1177.32	224.23	30.79	0				9	1	746.33	179.11	5824.14	1082.43	201.66	1.77
2010	3	14	1931.55	26.45	1205.16	164.47	33.84	0								47.47		10	13	22.87	19.19	927.22	177.89	24.72	0	201817			10	10	19.36	9.79	454.18	87.69	8.6	0				10	1	22.27	56.71	2428.5	451.92	56.95	0.53
2010	3	15	343.04	6.07	154.66	31.22	0.04	0								42.97		11	13	204.55	4.02	68.67	12.35	5.17	0	77179			11	10	95.32	1.85	32.67	5.94	2.21	0				11	1	250.01	14.29	224.5	37.08	17.36	0.36
2010	3	16	156.99	4.75	185.8	36.35	2.01	0								49.77		12	13	549.47	21.75	888.1	169.44	18.81	0	388173			12	10	201.98	11.06	432.79	83.11	7.06	0				12	1	510.49	72.57	2452.84	441.31	55.39	0.29
2010	3	17	143.61	2.19	147.36	30.27	0.06	0	10668.2	565.7	22112.1	4001.28	416.63	0.92		61.66	2014	1	13	958.69	16.27	612.22	114.75	18.47	0	523170		2014	1	10	577.9	7.84	305.7	58.63	6.73	0			2014	1	1	1009.58	63.15	1922.92	336.32	63.14	0.34
2010	4	1	890.06	7.34	98.43	16.55	5.98	0.11								15.29		2	13	1377.46	11.21	442.1	83.05	11.84	0	574716			2	10	732.81	6.44	242.45	46.08	4.85	0				2	1	1225.91	43.26	1390.56	245.52	42.12	0.25
2010	4	2	424.29	2.41	53.13	9.32	1.33	0								53.86		3	13	917.17	21.66	796.53	152.75	21.65	0	615185			3	10	542.62	8.85	370.65	70.93	7.78	0				3	1	872.25	83.18	2279.4	406.89	64.81	0.33
2010	4	3	308.12	1.61	30.66	5.54	1.58	0.03								30.08		4	13	726.45	6.87	198.67	38.79	7.97	0	386002			4	10	490.89	2.87	93.32	17.99	2.84	0				4	1	1005.42	29.15	632.9	111.48	25.64	0.25
2010	4	4	790.13	6.97	95.36	15.9	5.78	0.1								46.67		5	13	373.7	14.95	391.03	95.97	18.55	0	237662			5	10	226.14	4.77	116.59	25.82	4.79	0				5	1	365.17	37.56	748.15	155.21	36.77	0.52
2010	4	5	183.06	0.68	22.14	4.13	1.22	0.02								61.36		6	13	146.8	41.17	1928.71	495.21	52.86	0	307253			6	10	61.6	12.38	496.13	113.39	11.45	0				6	1	469.19	84.88	3111.82	676.35	87.29	0.85
2010	4	6	76.94	0.2	12.36	2.43	0.59	0								21.89		7	13	36.02	4.11	43.45	11.64	5.8	0	36173			7	10	19.59	1.21	12.82	3.01	1.73	0				7	1	56.88	8.61	85.47	18.34	10.65	0.55
2010	4	7	201.77	0.29	3.21	0.71	0.05	0								77.25		8	13	107.3	26.97	1175.32	222.58	38.48	0	324536			8	10	52.95	13.2	586.76	110.16	13.42	0				8	1	127.27	98.05	3467.91	622.27	124.65	1.12
2010	4	8	122.5	0.21	6.13	1.15	0.05	0								41.37		9	13	36.18	17.59	553.52	103.1	37.96	0	67183			9	10	49.78	10.71	284.41	53.96	13.27	0				9	1	54.1	54.17	1475.91	271.42	92.84	1.83
2010	4	9	74.78	0.12	6.12	1.17	0.33	0								43.67		10	13	0	5.04	67.95	12.19	7.56	0	32249			10	10	0	2.24	33.97	6.21	2.84	0				10	1	0	13.7	182.15	31.09	20.7	0.76
2010	4	10	305.47	0.84	30.39	5.68	1.26	0								23.88		11	13	4.48	2.83	44.15	7.59	3.87	0	21705			11	10	0	1.44	22.03	3.9	1.52	0				11	1	0	8.9	129.17	21.44	10.68	0.31
2010	4	11	420.79	2.3	18.51	3.08	0.82	0								105.93		12	13	76.57	51.16	2120.22	405.44	44.4	0	604167			12	10	44.39	25.73	1054.82	202.91	15.45	0				12	1	105.29	169.76	5699.99	1027.79	137.64	0.6
2010	4	12	1329.16	6.58	189.2	25.6	8.64	0.09								69.05	2015	1	13	1134.38	41.89	1707.5	326.64	30.51	0	974136		2015	1	10	784.99	20.33	850.55	164.29	11.07	0			2015	1	1	1028.29	146.89	4966.59	892.71	106.18	0.23
2010	4	13	459.8	1.55	56.79	10.95	3.01	0								11.19		2	13	1327.1	2.51	79.99	15.04	2.43	0	663561			2	10	608.96	1.29	40.4	7.7	1.01	0				2	1	1408	9.29	193.79	32.64	6.76	0.06
2010	4	14	846.6	3.83	171.58	22.89	6.73	0								56.06		3	13	933.19	20.7	750.81	145.78	17.15	0	635774			3	10	461.11	9.13	356.3	69.04	6.4	0				3	1	1021	75.23	2368.73	428.65	60.39	0.28
2010	4	15	275.18	0.28	3.17	0.73	0.01	0								41.47		4	13	769.65	11.23	362.08	70.98	13.19	0	451535			4	10	508.65	4.88	173.42	33.33	4.58	0				4	1	949.28	41.11	883.41	154.82	35.38	0.29
2010	4	16	159.04	0.16	3.58	0.74	0.08	0								38.67		5	13	396.54	8.29	201.9	44.87	10.14	0	234465			5	10	245.69	2.88	84.1	17.14	3.12	0				5	1	415.61	25.1	527.7	99.7	24	0.3
2010	4	17	101.72	0.08	2.65	0.62	0.01	0	6969.41	35.45	803.41	127.19	37.47	0.35		74.15		6	13	191.26	37.67	1387.27	409.78	56.16	0	208721			6	10	94.03	10.98	314.94	84.06	10.19	0				6	1	876.43	80.75	1956.74	481.54	75.67	0.88
2010	5	1	553.37	186.75	6906.4	1319.96	169.98	0.54								80.05		7	13	105.84	34.08	1119.3	294.32	42.76	0	222236			7	10	64.58	10.27	299.15	69.47	9.35	0				7	1	147.22	70.78	1804.27	399.3	67.24	1.06
2010	5	2	299.04	52.61	3413.6	647.7	31.59	0								25.48		8	13	610.38	6.37	178.64	33.54	11.64	0	76872			8	10	423.05	3.35	92.52	17.37	4.11	0				8	1	1023.62	23.14	538.61	96.55	32.06	0.83
2010	5	3	149.54	47.62	2724.06	540.11	30.93	0.16								47.17		9	13	57.86	16.97	498.6	93.05	34.53	0	75445			9	10	59.59	10.4	260.28	49.46	12.09	0				9	1	74.03	51.34	1334.68	246.84	78.78	1.52
2010	5	4	529.46	174.87	6671.18	1258.9	165.65	0.47								26.48		10	13	6.24	3.87	84.61	15.22	6.65	0	30451			10	10	3.35	2	43.31	7.99	2.46	0				10	1	0	12.21	252.72	44.64	16.17	0.38
2010	5	5	74.24	31.62	2157.76	431.14	22.91	0.08								129.51		11	13	80.43	59.57	2264.99	431.1	58.48	0	641929			11	10	36.13	29.41	1128.53	216.82	20.48	0				11	1	85.7	184.88	6596.58	1199.82	166.44	0.99
2010	5	6	29.02	14.3	1305.74	271.12	11.24	0								63.66		12	13	752.14	45.13	2320.29	444.49	43.53	0	859084			12	10	402.59	22.9	1172.72	226.79	16.22	0				12	1	744.55	163.54	6705.77	1226.42	154.22	0.54
2010	5	7	183.54	10.01	239.06	62.94	0.89	0								61.26	2016	1	13	1687.05	64.62	2758.01	535.47	28.85	0	1398444		2016	1	10	639	29.69	1350.47	263.12	11.21	0			2016	1	1	1228.06	205.08	7810.7	1444.34	141.09	0.13
2010	5	8	166.04	7.39	539.8	107.73	1.01	0								56.56		2	13	1022.54	27.79	1288.15	246.87	25.32	0	1099112			2	10	543.9	13.75	663.27	126.64	9.63	0				2	1	1373.86	80.56	2916.57	520	64.77	0.23
2010	5	9	25.04	9.71	595.6	114.89	4.73	0								43.27		3	13	1350.94	12.48	445.11	85.51	10.8	0	821344			3	10	538.11	5.71	221.42	42.75	4.06	0				3	1	1702.15	54.33	1424.58	256.17	36.24	0.2
2010	5	10	337.89	19.45	1090.94	218.02	17.42	0								20.69		4	13	890.47	4.89	173.07	35	5.88	0	464988			4	10	378.29	1.91	80.03	15.58	2.16	0				4	1	1333.14	17.91	450.12	82.38	14.95	0.09
2010	5	11	599.61	42.49	1195.94	258.55	28.9	0								45.77		5	13	322.45	27.74	1190.72	294.78	29.51	0	402291			5	10	137.84	8.27	373.97	80.72	7.53	0				5	1	400.45	62.48	2136.94	443.58	50.98	0.39
2010	5	12	968.09	71.67	2416.32	423.03	66.77	0.23								81.55		6	13	164.68	91.13	4782.5	1400.67	102.58	0	593984			6	10	84.73	25.72	1136.92	295.13	19.34	0				6	1	492.1	188.33	6434.89	1582.76	151.38	0.8
2010	5	13	352.9	59.38	2768.16	604.55	54.61	0								134.31		7	13	154.48	72.98	2788.78	609.77	77.87	0	752826			7	10	67.49	28.49	1129.46	225.23	23.43	0				7	1	161.49	198.21	6455.04	1235.41	222.53	1.6
2010	5	14	452.84	22.94	1179.52	160.91	29.98	0								85.04		8	13	1175.76	33.65	1170.11	216.17	49.91	0	389181			8	10	501.74	17.53	572.98	105.32	18.12	0				8	1	542.21	113.11	3347.28	582.21	145.11	1.92
2010	5	15	294.73	11.81	365.86	88.35	0.11	0								32.88		9	13	529.67	7.96	213.25	39.34	12.83	0	110331			9	10	492.53	4.4	110.86	20.76	5.06	0				9	1	1188.65	28.43	648.11	113.88	41.36	0.77
2010	5	16	139.45	7.99	353.28	77.31	4.38	0								92.84		10	13	130.15	43.53	2124.25	402.87	64.41	0	446285			10	10	86.79	23.67	1088.23	208.85	22.48	0				10	1	124.01	140.72	5840.31	1063.08	177.83	1.19
2010	5	17	95.53	4.08	317.2	79.55	0.14	0	5250.33	774.69	34240.4	6664.76	641.24	1.48		114.12		11	13	958.77	71.17	3721.03	714.14	65.53	0	1342604			11	10	481.07	34.91	1871.85	363.06	23.67	0				11	1	1063.49	255.23	11193.3	2043.14	239.37	0.54
2010	6	1	531.79	57.37	1663.13	348.12	62.34	0.88								42.17		12	13	1115.84	12.82	482.52	91.62	11.04	0	1115925			12	10	840.11	6.38	246.88	47.72	4.24	0				12	1	1829.07	50.72	1310.84	230.8	34.74	0.21
2010	6	2	343.37	17.55	810.66	159.38	14.84	0								62.06	2017	1	13	1294.38	23.81	894.67	170.25	17.56	0	1190065		2017	1	10	809.79	10.96	453.84	87.99	6.85	0			2017	1	1	2165.29	86.9	2852.44	511.75	62.74	0.19
2010	6	3	125.16	14.91	582.78	127.6	13.37	0.25								70.95		2	13	932.17	55.97	2323.72	451.54	30.89	0	1603593			2	10	599.5	25.39	1103.93	213.49	11.71	0				2	1	1659.92	178.01	6021.05	1087.86	104.92	0.2
2010	6	4	526.43	53.41	1560.9	316.66	60.01	0.74								54.06		3	13	1574.35	18.59	725.82	139.9	14.84	0	1428805			3	10	960.22	8.98	365.19	70.47	6.05	0				3	1	2798.78	65.83	2102.4	377.56	48.4	0.16
2010	6	5	52.8	9.08	428.57	95.46	9.83	0.13								87.34		4	13	1368.1	30.27	1063.82	216.23	23.01	0	1148515			4	10	770.25	11.41	471.55	91.38	8.13	0				4	1	1932.35	107.11	2893.37	524.4	68.65	0.27
2010	6	6	15.63	4.06	261.16	63.01	4.79	0								22.48		5	13	1392.47	8.35	273.79	60.63	8.05	0	753615			5	10	875.17	3.31	109.84	22.11	2.77	0				5	1	1733.71	26.6	670.15	127.05	21.04	0.14
2010	6	7	116.93	3.19	104.32	32.2	0.7	0								88.44		6	13	554.54	70.46	3019.18	896.48	82.2	0	647316			6	10	334.28	19.58	715.29	187.23	15.72	0				6	1	1462.31	133.99	4203.85	1040.08	115.45	0.65
2010	6	8	63.82	2.3	136.57	30.54	0.52	0								150.5		7	13	400.69	142.78	6547.39	1787.7	163.81	0	1196253			7	10	176.18	44.89	1859.02	438.47	37.38	0				7	1	455.96	297.29	10531.1	2408.07	275.65	1.51
2010	6	9	14.42	2.37	108.48	22.31	2.13	0								58.06		8	13	2236.31	20.68	796.12	144.3	36.35	0	329361			8	10	1063.23	10.95	398.8	71.7	13.79	0				8	1	2581.56	74.26	2410.44	413.79	116.96	1.51
2010	6	10	79.81	8.67	345.7	73.69	10.61	0								126.22		9	13	919.94	162.18	10379.7	1996.71	217.19	0	1207364			9	10	745.2	104.35	5522.92	1069.03	84.16	0				9	1	1646.34	552.29	29149.9	5398.76	698.55	2.4
2010	6	11	542.65	14.27	346.51	87.34	10.95	0								104.83		10	13	1069.55	49.81	1973.26	379.5	52.92	0	1023373			10	10	651.77	24.57	994.6	193.13	19.57	0				10	1	1220.24	170.39	5706.67	1035.68	169.92	0.88
2010	6	12	673.9	28.2	832.66	152.43	36.55	0.45								61.66		11	13	1715.97	23.43	818.8	156.92	16.48	0	1216356			11	10	1178.65	11.45	413.36	79.88	6.38	0				11	1	1949.66	82.11	2388.94	430.46	52.69	0.19
2010	6	13	173.17	25.53	1032.49	259.83	41.66	0								91.94		12	13	2283.46	51.62	2042.35	393.72	31.56	0	2176563			12	10	1357.07	25.38	1036.26	200.73	13.03	0				12	1	3202.1	189.8	5928.37	1072.09	115.32	0.22
2010	6	14	220.1	11.28	480.15	65.22	20.98	0								54.16	2018	1	13	2883.95	22.77	999.99	192.53	16.28	0	1674804		2018	1	10	1500.2	10.85	508.28	98.62	6.61	0			2018	1	1	3384.06	78.82	2992.33	544.52	54.13	0.18
2010	6	15	176.8	3.07	135.5	38.94	0.08	0								30.98		2	13	2091.5	3.55	133.12	25.49	3.25	0	1161864			2	10	1269.25	1.87	69.22	13.17	1.48	0				2	1	4458.8	13.67	326.38	55.77	9.19	0.05
2010	6	16	48.71	2.6	104.46	26.66	2.21	0								33.08		3	13	2460.63	15.85	610.9	119.73	10.79	0	1061476			3	10	1861.33	7.68	293.15	56.46	4.24	0				3	1	6112.3	53.45	1604.9	290.36	31.65	0.1
2010	6	17	51.43	1.05	92.1	28.92	0.07	0	3756.92	258.91	9026.14	1928.31	291.64	2.45		39.27		4	13	1440.25	16.12	667.05	138.81	14.2	0	815115			4	10	911.55	6.77	288.8	57.26	4.95	0				4	1	3479.31	57.6	1735.08	324.77	38.81	0.15
2010	7	1	56.44	201.19	6514.82	1205.79	200.39	1.61								8.29		5	13	562.86	0.31	2.99	0.95	1.14	0	273688			5	10	436.49	0.09	0.74	0.21	0.62	0				5	1	894.09	0.53	3.48	1.04	2.01	0.13
2010	7	2	31.31	62.37	3349.39	617.47	38.76	0								28.28		6	13	242.41	5.36	87.45	32.29	9.89	0	105207			6	10	125.94	1.75	17.74	6.37	2.25	0				6	1	410.11	10.64	112.62	36.78	11.87	0.55
2010	7	3	19.16	50.95	2443.38	468.66	33.42	0.46								75.25		7	13	41.17	39.1	1144.15	226.8	29.19	0	545231			7	10	37.13	15.95	522.51	100.62	10.2	0				7	1	22.53	118.97	3216.87	582.67	95.25	0.79
2010	7	4	50.26	185.17	6311.56	1158.47	195.09	1.35								52.76		8	13	216.46	11	269.98	51.08	21.24	0	119823			8	10	63.59	5.15	122.47	22.76	7.46	0				8	1	233.1	34.82	653.76	114.88	44.22	1.18
2010	7	5	8.75	31.35	1879.3	364.16	24.41	0.26								38.47		9	13	3.88	21.76	1077.34	203.61	55.46	0	99120			9	10	0	12.34	496.2	95.41	17.09	0				9	1	0	65.55	2560.91	482.3	120.69	2.26
2010	7	6	5.04	13.75	1099.71	219.9	11.92	0								35.48		10	13	0	3.36	45.17	8.29	3.56	0	30779			10	10	0	1.46	19.78	3.58	1.54	0				10	1	0	8.71	119.54	20.64	9.06	0.37
2010	7	7	50.74	14.44	207.44	48.73	1.31	0								21.49		11	13	0.67	4.12	71.53	13.59	3.85	0	45357			11	10	0.18	2.01	31.7	6.01	1.35	0				11	1	0	12.05	188.88	33.01	9.4	0.22
2010	7	8	26.2	11.08	519.69	99.72	1.23	0								88.24		12	13	28.24	20.38	462.38	88.04	12.59	0	219909			12	10	6.59	9.3	206.66	39.38	4.45	0				12	1	14.29	62.95	1280.19	229.84	36.14	0.26
2010	7	9	5.11	9.8	515.27	97.91	5.16	0								66.66	2019	1	13	631.71	20.44	579.17	108.86	17.53	0	373258		2019	1	10	274.74	10	284.34	53.55	6.64	0			2019	1	1	675.37	69.55	1527.81	264.91	49.26	0.37
2010	7	10	31.7	27.75	1111.98	216.08	22.24	0								26.48		2	13	960.58	8.59	272.65	51.59	7.1	0	452598			2	10	481.56	3.83	131.27	25.05	2.79	0				2	1	977.03	29.8	835.82	147.22	24	0.14
2010	7	11	59.21	47.68	1112.14	224.44	41.46	0								84.74		3	13	1683.82	43.05	1459.62	281.24	28.15	0	1196735			3	10	1284.24	19.66	698.61	134.41	10.5	0				3	1	2212.39	140.44	4048.49	720.89	94.95	0.32
2010	7	12	84.33	83.96	2313.79	388.95	100.08	0.76								13.29		4	13	1365.36	4.42	114.98	23.75	5.35	0	574525			4	10	978.81	1.63	51.75	10.26	1.89	0				4	1	1893.23	16.05	314.92	58.66	14.29	0.14
2010	7	13	60.38	67.66	2635.61	547.67	71.24	0								49.27		5	13	504.98	14.62	322.59	75.71	14.19	0	284806			5	10	374.14	4.76	118.99	25.23	3.79	0				5	1	707.54	41.92	764.95	148.87	31.97	0.36
2010	7	14	25.21	30.3	1154.05	158.94	49.57	0								57.26		6	13	202.71	70.54	3515.25	917.28	86.71	0	609110			6	10	124.72	23.65	1022.51	234.06	20.14	0				6	1	923.89	165.21	6047.61	1324.05	180.61	1.03
2010	7	15	79.51	15.84	308.07	70.33	0.12	0								43.87		7	13	75.99	9.07	135.69	31.63	9.95	0	81259			7	10	55.6	3.04	50.29	10.48	3.21	0				7	1	82.29	23.11	370.64	70.79	25.55	0.57
2010	7	16	21.54	10.1	321.24	67.32	4.92	0								26.68		8	13	289.33	3.72	58.3	11.67	5.04	0	43169			8	10	94.32	1.57	28.55	5.47	2.11	0				8	1	329.8	13.11	187.23	33.08	14	0.49
2010	7	17	26.58	5.87	260.29	61.69	0.15	0	641.47	869.26	32057.7	6016.23	801.47	4.44		112.32		9	13	189.5	60.96	2804.94	538.51	95.68	0	301418			9	10	223.13	33.56	1412.73	273.99	34.5	0				9	1	335.06	189.26	7793.37	1463.42	262.42	2.96
2010	8	1	625.57	173.62	4943.47	865.94	233.21	3.2								106.93		10	13	284.1	83.56	4666.73	909.28	90.14	0	948934			10	10	133.57	45.76	2344.97	456.63	32.27	0				10	1	354.73	254.39	11002.9	2054.43	253.7	1.33
2010	8	2	517.5	55.36	2587.74	459.31	50.82	0								54.16		11	13	523.93	21.16	783.5	147.65	23.08	0	354469			11	10	259.31	10.89	394.45	75.35	9.04	0				11	1	470.97	73.14	2410.97	431.67	73.98	0.46
2010	8	3	251.27	45.08	1851.54	334.41	51.48	0.93								48.57		12	13	875.49	8.35	218.27	40.91	7.1	0	461697			12	10	573.1	4.22	110.12	21.14	2.81	0				12	1	1054.13	35.56	733.51	125.79	27.05	0.19
2010	8	4	547.23	161.65	4811.63	840.65	226.89	2.76
2010	8	5	201.57	27.24	1425.67	260.41	39.19	0.51
2010	8	6	126.6	11.52	823.89	153.07	19.08	0
2010	8	7	315.29	10.18	139.23	27.03	1.01	0
2010	8	8	200.51	9.19	391.95	70.81	1.44	0
2010	8	9	105.46	7.53	401.7	73.29	8.45	0
2010	8	10	433.41	26	901.09	165.11	29.52	0
2010	8	11	93.36	37.9	832.66	143.71	33.5	0
2010	8	12	422.78	73.13	1999.46	301.31	100.61	1.09
2010	8	13	537.59	52.88	1881.24	349.42	84.7	0
2010	8	14	466.25	29.43	1145.03	155.72	55.05	0
2010	8	15	390.56	11.44	205.43	39.8	0.11	0
2010	8	16	237.49	7.67	235.93	44.08	4.51	0
2010	8	17	185.61	4.39	178.1	35.27	0.15	0	5658.05	744.21	24755.8	4319.34	939.72	8.49
2010	9	1	208.32	681.95	47451.5	8910.8	1110.69	3.45
2010	9	2	118.83	196.14	24398.8	4655.07	256.61	0
2010	9	3	69.59	163.49	18558.3	3558.63	192.78	0.94
2010	9	4	170.68	644.93	46276.6	8684.74	1077.93	2.82
2010	9	5	44.64	107.77	14698.5	2833.26	131.43	0.45
2010	9	6	26.81	46.13	8500.54	1648.43	53.55	0
2010	9	7	121.2	26.27	1220.83	236.47	5.77	0
2010	9	8	64.42	28.94	3847.34	737.8	7.95	0
2010	9	9	31.51	31.98	4459.63	864.39	25.2	0
2010	9	10	128.73	99.71	8531.78	1665.99	93.35	0
2010	9	11	97.33	87.66	5530.41	985.57	136.28	0
2010	9	12	219.84	211.78	14532.1	2232.11	450.56	1.75
2010	9	13	196.75	203.72	16660.7	3219.61	341.3	0
2010	9	14	119.34	102.39	8716.5	1214.1	262.27	0
2010	9	15	144.59	24.91	1819.27	357.96	0.37	0
2010	9	16	51.49	27.36	2179.74	426.23	21.26	0
2010	9	17	62.04	12.32	1750.43	350.72	0.88	0	1876.11	2697.45	229133	42581.9	4168.18	9.41
2010	10	1	229.48	36.05	1016.23	178.59	33.44	0.37
2010	10	2	139.25	11.65	539.26	98.3	8.03	0
2010	10	3	80.29	9.2	350.13	64.27	7.13	0.1
2010	10	4	181.07	33.85	981.11	172.18	32.36	0.31
2010	10	5	44.97	5.53	264.37	49.27	5.29	0.05
2010	10	6	38.31	2.48	152.67	28.92	2.57	0
2010	10	7	163.13	1.74	35.96	6.85	0.22	0
2010	10	8	81.9	1.63	74.56	13.97	0.23	0
2010	10	9	46.96	1.45	74.43	14.09	1.19	0
2010	10	10	158.24	11.79	477.46	89.06	11.67	0
2010	10	11	223.54	6.77	139.58	22.98	3.4	0
2010	10	12	236.2	34.81	2145.73	293.26	80.85	0.87
2010	10	13	277.69	13.21	820.42	154.55	33.52	0
2010	10	14	1.78	23.59	2013.79	273.79	66.63	0
2010	10	15	238.39	1.67	30.73	6.06	0.02	0
2010	10	16	80.62	1.44	41.76	7.99	0.61	0
2010	10	17	80.5	0.71	28.31	5.72	0.02	0	2302.32	197.57	9186.5	1479.85	287.18	1.7
2010	11	1	271.3	178.23	6445.51	1154.92	159.91	0.65
2010	11	2	219.18	58.25	3367.02	618.13	35.15	0
2010	11	3	98.46	48.42	2362.68	440.89	34.2	0.18
2010	11	4	230.68	168.42	6298.69	1128.26	155.07	0.55
2010	11	5	105.96	32.18	1872.82	353.51	25.3	0.09
2010	11	6	51.14	14.43	1101.69	210.57	11.9	0
2010	11	7	226.96	7.6	149.76	28.82	0.6	0
2010	11	8	120.06	7.47	451.24	84.74	0.92	0
2010	11	9	46.82	9.61	536.46	102.67	5.36	0
2010	11	10	225.97	25.73	1128.91	216.27	18.8	0
2010	11	11	459.42	31.26	859.57	146.2	16.55	0
2010	11	12	1372.36	82.27	3332.66	482.36	84.23	0.31
2010	11	13	361.56	51.63	2248.97	426.02	52.61	0
2010	11	14	995.07	44.02	2428.05	332.63	56.34	0
2010	11	15	305.1	8.76	204.14	40.22	0.07	0
2010	11	16	120.77	6.82	251.26	48.52	2.86	0
2010	11	17	108.71	3.29	195.19	39.2	0.09	0	5319.52	778.39	33234.6	5853.93	659.96	1.78
2010	12	1	1770.86	3.13	52.19	8.58	2.45	0.03
2010	12	2	752.75	1.11	27.48	4.74	0.5	0
2010	12	3	642.79	0.75	17.59	3.13	0.78	0.01
2010	12	4	1563.41	2.97	51.56	8.48	2.37	0.03
2010	12	5	389.12	0.42	14.29	2.63	0.61	0
2010	12	6	159.16	0.16	8.31	1.55	0.3	0
2010	12	7	413.44	0.13	0.68	0.12	0.02	0
2010	12	8	241.66	0.1	2.33	0.4	0.02	0
2010	12	9	169.5	0.1	4.35	0.84	0.17	0
2010	12	10	635.76	0.27	7.63	1.46	0.38	0
2010	12	11	796.82	0.75	8.75	1.32	0.31	0
2010	12	12	3560.78	2.37	69.53	9.28	2.18	0.01
2010	12	13	870.25	0.52	12.9	2.37	0.7	0
2010	12	14	2582.7	1.48	60.44	8.01	1.58	0
2010	12	15	444.8	0.13	0.9	0.16	0	0
2010	12	16	235.01	0.07	1.04	0.19	0.03	0
2010	12	17	217.88	0.04	0.87	0.17	0	0	15446.7	14.5	340.84	53.43	12.4	0.08
2011	1	1	1121.17	229.42	9185.92	1658.07	165.97	0.19
2011	1	2	594.03	69.45	4763.43	883.4	31.94	0
2011	1	3	416.45	60.62	3452.11	650.95	29.37	0.05
2011	1	4	1009.33	217.38	8973.76	1618.58	161.45	0.15
2011	1	5	325.56	42.59	2755.03	524.71	21.27	0.02
2011	1	6	134.11	19.53	1614.75	310.98	9.83	0
2011	1	7	334.84	9.65	215.2	41.65	0.6	0
2011	1	8	187.1	8.8	649.69	122.65	0.91	0
2011	1	9	143.95	14.53	805.31	154.88	4.39	0
2011	1	10	435.09	30.18	1612.59	310.77	17.69	0
2011	1	11	812.03	38.4	1195.87	204.73	20.24	0
2011	1	12	2954.14	98.55	4185.35	608	95.13	0.16
2011	1	13	705.85	63.56	3241.34	621.03	45.08	0
2011	1	14	2281.71	52.19	2918.84	396.51	65.09	0
2011	1	15	511.11	11.79	294.3	58.13	0.07	0
2011	1	16	163	9	366.78	70.88	3.54	0
2011	1	17	189.23	4.12	282.25	56.9	0.09	0	12318.7	979.76	46512.5	8292.82	672.66	0.57
2011	2	1	1662.47	268.41	11166.9	2033.87	191.1	0.2
2011	2	2	751.72	82.53	5732.03	1067.06	41.35	0
2011	2	3	740.23	70.1	4249.11	807.03	27.26	0.05
2011	2	4	1501.21	251.42	10888.5	1980.76	186.55	0.16
2011	2	5	599.69	49.35	3375.19	646.52	19.76	0.02
2011	2	6	291.05	23.07	1968.04	381.34	9.14	0
2011	2	7	486.48	14.82	280.83	55.15	0.94	0
2011	2	8	237.81	11.78	818.75	155.39	0.87	0
2011	2	9	260.61	17.67	994.39	191.36	4.08	0
2011	2	10	622.89	36.62	2066.15	399.81	17.56	0
2011	2	11	1223.8	47.43	1464.84	253.4	27.89	0
2011	2	12	4599.8	115.39	5017.28	734.82	117.09	0.25
2011	2	13	953.07	79.2	4179.5	810.97	45.18	0
2011	2	14	3336.7	56.19	3475.21	475.14	73.89	0
2011	2	15	778.28	17.79	383.46	76.47	0.06	0
2011	2	16	208.36	11.69	471.45	91.9	3.5	0
2011	2	17	266.89	6.13	359.19	72.99	0.08	0	18521.1	1159.59	56890.7	10234	766.3	0.68
2011	3	1	2972.97	79.12	2751.82	494.83	54.62	0.16
2011	3	2	1378.25	27.21	1428.04	262.22	12.58	0
2011	3	3	1340.14	20.32	1024.41	191.68	11.18	0.04
2011	3	4	2741.64	74.66	2689.62	483.13	52.95	0.13
2011	3	5	1125.26	12.77	816.55	154.61	8.2	0.02
2011	3	6	613.72	5.37	479.5	92.04	3.78	0
2011	3	7	562.43	3.57	63.61	12.43	0.24	0
2011	3	8	479.98	3.26	193.19	36.14	0.34	0
2011	3	9	471.51	3.74	236.84	45.37	1.78	0
2011	3	10	1212.82	9.85	465.91	89.2	6.7	0
2011	3	11	957.21	16	365.94	62.68	6.17	0
2011	3	12	3873.1	37.2	1326.55	192.4	31.85	0.13
2011	3	13	1390.82	20.9	924.22	175.68	17.71	0
2011	3	14	2959.42	18.33	941.18	128.2	21.35	0
2011	3	15	709.56	4.05	88.53	17.52	0.03	0
2011	3	16	437.92	2.92	107.93	20.8	1.07	0
2011	3	17	309.38	1.45	85.28	17.2	0.04	0	23536.1	340.72	13989.1	2476.13	230.59	0.48
2011	4	1	1200.72	19.68	415.77	72.9	15.72	0.13
2011	4	2	504.96	6.88	218.7	39.39	3.51	0
2011	4	3	545.44	4.58	150.95	27.99	3.65	0.04
2011	4	4	1093.07	18.62	407.23	71.25	15.24	0.11
2011	4	5	453.28	2.51	120.32	22.7	2.73	0.02
2011	4	6	233.78	0.91	71.15	13.7	1.26	0
2011	4	7	251.53	0.84	8.94	1.85	0.08	0
2011	4	8	249.62	0.74	27.25	5.06	0.1	0
2011	4	9	182.13	0.58	34.26	6.59	0.66	0
2011	4	10	393.67	1.89	62.2	11.94	1.93	0
2011	4	11	610.47	4.66	61.65	10.41	1.86	0
2011	4	12	1882.09	10.25	231.44	32.88	9.65	0.08
2011	4	13	535.78	3.96	121.08	23.11	4.52	0
2011	4	14	1175.14	4.99	167.07	22.36	6.57	0
2011	4	15	346.54	0.88	12.77	2.62	0.01	0
2011	4	16	208.78	0.56	14.73	2.9	0.2	0
2011	4	17	129.75	0.3	12.29	2.55	0.01	0	9996.75	82.83	2137.8	370.2	67.7	0.38
2011	5	1	376.08	13.62	185.19	36.18	13.45	0.31
2011	5	2	219.03	4.17	90.24	17.05	2.81	0
2011	5	3	154.17	3.31	63.95	13.42	3.59	0.09
2011	5	4	337.7	12.37	174.13	32.87	12.95	0.28
2011	5	5	139	1.76	45.59	9.85	2.74	0.05
2011	5	6	78.83	0.73	27.48	6.51	1.48	0
2011	5	7	137.19	1.1	11.54	3.46	0.16	0
2011	5	8	90.31	0.7	15.38	3.37	0.12	0
2011	5	9	66.15	0.35	11.1	2.3	0.58	0
2011	5	10	182.35	1.5	25.6	5.62	1.76	0
2011	5	11	246.32	3.71	47.38	11	2.65	0
2011	5	12	705.41	5.78	78.98	14.96	5.62	0.08
2011	5	13	298.75	4.67	67.6	17	5.36	0
2011	5	14	435.99	1.75	31.88	4.21	2.27	0
2011	5	15	188.09	1.25	17.39	4.76	0.03	0
2011	5	16	92.83	0.61	11.67	2.96	0.29	0
2011	5	17	70.89	0.42	11.45	3.42	0.02	0	3819.09	57.8	916.55	188.94	55.88	0.81
2011	6	1	654.28	12.11	129.88	37.08	14	0.63
2011	6	2	359	2.76	43.27	11.71	2.5	0
2011	6	3	155.71	3.07	45.32	13.77	4.12	0.2
2011	6	4	651.64	10.62	105.42	28.25	13.15	0.57
2011	6	5	70	1.64	27.43	8.9	3.05	0.12
2011	6	6	20	0.59	20.08	7.31	1.71	0
2011	6	7	72.51	1.26	25.17	9.14	0.45	0
2011	6	8	59.22	0.67	17.24	5.28	0.22	0
2011	6	9	14.97	0.35	4.68	1.54	0.57	0
2011	6	10	86.86	1.75	18.27	6.05	2.23	0
2011	6	11	328.34	3.49	57.72	18.03	4.63	0
2011	6	12	597.09	4.56	64.46	18.59	6.37	0.13
2011	6	13	127.3	5.7	83.41	28.7	10.33	0
2011	6	14	260.15	0.57	8.26	1.24	0.88	0
2011	6	15	81.15	1.3	42.74	13.32	0.07	0
2011	6	16	37.14	0.85	20.27	6.43	0.76	0
2011	6	17	30.41	0.44	21.16	8.04	0.06	0	3605.77	51.73	734.78	223.38	65.1	1.65
2011	7	1	73.75	262.44	8754.59	1735.34	291.48	1.99
2011	7	2	44.67	82.46	4312.34	826.56	71.29	0
2011	7	3	22.22	66.91	3358.73	689.88	53.3	0.57
2011	7	4	61.13	241.33	8383.95	1631.06	283.08	1.69
2011	7	5	8.16	41.79	2570.34	532.7	39.7	0.31
2011	7	6	15.24	18.77	1551.11	339.1	19.72	0
2011	7	7	86.56	18.55	375.93	106.7	2.46	0
2011	7	8	35.23	13.36	736.69	152.78	1.84	0
2011	7	9	9.35	12.31	694.61	136.63	8.1	0
2011	7	10	31.49	36.4	1483.3	306.29	31.84	0
2011	7	11	113.28	64.62	1865.76	424.34	56.31	0
2011	7	12	134.48	110.89	3433.01	637.68	128.97	0.81
2011	7	13	120.07	100.44	4233.67	978.74	118.13	0
2011	7	14	49.31	35.55	1417.19	194.4	56.46	0
2011	7	15	131.54	20.19	629.02	161.27	0.25	0
2011	7	16	38.72	13.26	524.51	122.68	7.51	0
2011	7	17	38.23	7.39	450.27	124.5	0.26	0	1013.43	1146.66	44775	9100.65	1170.7	5.37
2011	8	1	1876.35	187.37	6562.47	1147.54	244.53	2.72
2011	8	2	1120.96	61.36	3424.47	609.3	54.55	0
2011	8	3	645.63	50.1	2449.73	441.76	55.75	0.78
2011	8	4	1639.08	175.66	6406.81	1119.17	237.49	2.33
2011	8	5	437.01	31.06	1922.67	350.1	41.71	0.39
2011	8	6	235.47	13.19	1126.03	207.55	19.53	0
2011	8	7	416.1	9.48	163.3	30.6	1	0
2011	8	8	341.75	9.57	494.05	89.4	1.52	0
2011	8	9	208.95	8.57	550.56	101.23	9.29	0
2011	8	10	859.67	28.68	1130.39	208.49	29.37	0
2011	8	11	306.79	34.59	951.15	160.06	26.64	0
2011	8	12	1352.81	79.73	2878.32	421.76	109.29	0.91
2011	8	13	1031.83	53.74	2229.3	409.85	81.14	0
2011	8	14	1197.58	38.8	1888.62	258.13	68.5	0
2011	8	15	463.16	10.37	237.36	44.94	0.12	0
2011	8	16	340.5	8.1	282.41	52.3	4.61	0
2011	8	17	249.5	4.33	222.01	42.67	0.15	0	12723.1	804.7	32919.7	5694.85	985.19	7.13
2011	9	1	596.98	145.07	6568.76	1200.36	214.19	2.01
2011	9	2	393.79	44.27	3480.16	652.24	48.96	0
2011	9	3	265.12	38.55	2496.58	469.48	50.32	0.58
2011	9	4	512.44	137.68	6421.79	1173.5	208.05	1.73
2011	9	5	164.31	25.81	1990.73	377.05	37.97	0.3
2011	9	6	92.95	11.34	1165.76	222.48	17.86	0
2011	9	7	234.91	5.09	154.75	29.54	0.84	0
2011	9	8	190.05	6.51	506.3	95.87	1.33	0
2011	9	9	87.32	7.26	592.06	113.84	8.67	0
2011	9	10	410.53	27.13	1193.98	229.35	27.81	0
2011	9	11	275.88	15.53	732.89	126.7	18.58	0
2011	9	12	914.26	56.57	2855.12	415.44	115.03	1.28
2011	9	13	496.54	41.78	2272.04	429.83	75.38	0
2011	9	14	626.51	35.57	2085.54	286.09	81.76	0
2011	9	15	292.71	4.6	219.57	42.91	0.09	0
2011	9	16	146.36	6.14	274.48	52.91	4.36	0
2011	9	17	113.68	2.74	225.6	44.9	0.14	0	5814.34	611.64	33236.1	5962.49	911.34	5.9
2011	10	1	282.92	7.07	142.23	24.11	11.94	0.29
2011	10	2	135.56	2	78.32	14.24	2.5	0
2011	10	3	104.67	1.73	54	9.65	3.66	0.09
2011	10	4	239.05	6.63	139.73	23.71	11.6	0.26
2011	10	5	74.83	1.1	44.33	8.06	2.9	0.05
2011	10	6	34.19	0.39	26.95	5	1.47	0
2011	10	7	112.49	0.31	2.87	0.53	0.06	0
2011	10	8	103.57	0.25	9.79	1.79	0.08	0
2011	10	9	32.54	0.31	12.64	2.38	0.73	0
2011	10	10	156.55	0.87	22.05	4.18	1.39	0
2011	10	11	151.94	1.05	20.38	3.33	1.3	0
2011	10	12	364.53	3.43	85.19	11.38	7.61	0.13
2011	10	13	281.9	1.9	41.56	7.57	3.43	0
2011	10	14	189.26	2.07	64.19	8.12	5.47	0
2011	10	15	157.25	0.37	4.66	0.88	0.01	0
2011	10	16	79.03	0.22	5.31	0.99	0.13	0
2011	10	17	55.98	0.14	4.73	0.93	0.01	0	2556.26	29.84	758.93	126.85	54.29	0.82
2011	11	1	5.09	26.2	837.49	149.54	27.55	0.3
2011	11	2	57.64	8.06	437.77	81.27	6.15	0
2011	11	3	1.8	6.77	321.24	59.85	6.69	0.09
2011	11	4	4.44	24.82	819.76	146.46	26.74	0.27
2011	11	5	29.76	4.38	258.3	48.65	5.01	0.05
2011	11	6	14.76	1.87	155.19	29.63	2.35	0
2011	11	7	44.41	1	18.51	3.53	0.12	0
2011	11	8	23.37	1.04	61.34	11.58	0.18	0
2011	11	9	13.44	1.16	72.68	13.93	1.14	0
2011	11	10	57.34	3.92	136.94	25.94	3.55	0
2011	11	11	51.37	4.04	113.84	19.53	2.96	0
2011	11	12	127.97	11.03	345.17	49.87	13.5	0.13
2011	11	13	69.59	7.08	268.19	49.47	9.86	0
2011	11	14	102.48	6.08	226.55	30.19	8.69	0
2011	11	15	60.26	1	27.86	5.45	0.02	0
2011	11	16	29.35	0.89	34.01	6.55	0.37	0
2011	11	17	23.86	0.46	28.13	5.62	0.02	0	716.93	109.8	4162.97	737.06	114.9	0.84
2011	12	1	197.91	60.15	1606.29	281.76	50.53	0.32
2011	12	2	237.2	19.91	845.04	153.62	10.91	0
2011	12	3	69.26	15.74	584.95	108.07	11.76	0.09
2011	12	4	174.95	57.07	1575.5	276.28	49.03	0.28
2011	12	5	115.42	10.21	470.28	88.12	8.94	0.05
2011	12	6	52.84	4.44	279.98	53.17	4.35	0
2011	12	7	145.59	2.34	32.24	6.17	0.17	0
2011	12	8	86.32	2.23	103.81	19.41	0.26	0
2011	12	9	41.88	2.85	134.26	25.75	1.93	0
2011	12	10	217.86	7.33	252.54	48.35	5.29	0
2011	12	11	360.61	11.14	222.52	37.1	5.31	0
2011	12	12	1706.94	27.74	821.09	117.03	25.18	0.14
2011	12	13	241.57	14.94	495.44	92.51	14.32	0
2011	12	14	1335.85	14.51	587.04	79.29	16.44	0
2011	12	15	199.49	2.67	45.68	8.99	0.02	0
2011	12	16	97.14	1.86	55.79	10.79	0.55	0
2011	12	17	74.3	0.97	44.86	9.02	0.03	0	5355.13	256.1	8157.31	1415.43	205.02	0.88
2012	1	1	940.73	81.99	2213.58	389.93	54.4	0.27
2012	1	2	852.31	28.65	1161.22	210.62	11.68	0
2012	1	3	335.32	21.94	793.36	147.4	11.84	0.08
2012	1	4	842.16	77.56	2171.82	382.45	52.79	0.23
2012	1	5	429.62	14.58	639.21	120.67	8.92	0.04
2012	1	6	179.16	6.37	377.17	72.19	4.21	0
2012	1	7	478.62	3.55	43.23	8.27	0.18	0
2012	1	8	280.72	3.09	133.48	24.9	0.27	0
2012	1	9	174.86	4.55	186.98	36.08	1.9	0
2012	1	10	731.98	9.82	351.21	67.8	5.71	0
2012	1	11	1174.17	15.21	304.31	50.37	5.83	0
2012	1	12	5485.9	36.77	1202.61	171.71	28.72	0.11
2012	1	13	959.51	20.51	692.34	130.75	14.99	0
2012	1	14	4241.19	18.94	882.67	120.35	19	0
2012	1	15	674.91	4.18	58.81	11.5	0.02	0
2012	1	16	345.01	2.84	72.24	13.85	0.86	0
2012	1	17	245.61	1.42	56.67	11.39	0.03	0	18371.8	351.97	11340.9	1970.23	221.35	0.73
2012	2	1	1806.03	170.01	7664.92	1398.91	132.01	0.23
2012	2	2	920.33	47.99	3946.15	738.69	24.02	0
2012	2	3	808	42.21	2916.09	555.16	21.44	0.06
2012	2	4	1651.54	160.09	7484.13	1364.17	128.73	0.19
2012	2	5	780.47	29.27	2323.39	446.53	15.53	0.03
2012	2	6	383.65	13.55	1368.6	266.11	7.24	0
2012	2	7	403.93	8.25	183.72	36.35	0.47	0
2012	2	8	261.15	6.75	555.07	105.53	0.7	0
2012	2	9	325.91	9.86	670.09	129.55	3.17	0
2012	2	10	653.32	22.14	1312.38	254.67	13.29	0
2012	2	11	1010.84	31.7	1045.37	181.28	22.99	0
2012	2	12	4327.55	69.84	3113.62	463.11	71.85	0.13
2012	2	13	987.71	48.3	2710.53	525.47	35.44	0
2012	2	14	3506.45	32.24	2007.77	275.27	42.19	0
2012	2	15	584.84	10.01	263.75	52.79	0.05	0
2012	2	16	338.66	6.95	314.69	61.43	2.81	0
2012	2	17	233.82	3.4	244.73	49.95	0.07	0	18984.2	712.56	38125	6904.97	522	0.64
2012	3	1	2310.35	22.29	542.76	97.92	14.27	0.06
2012	3	2	1039.58	7.9	276.52	50.73	3.16	0
2012	3	3	1124.98	5.5	205.17	38.73	3.39	0.02
2012	3	4	2120.69	20.98	531.18	95.6	13.81	0.05
2012	3	5	879.8	3.18	163.43	31.32	2.53	0.01
2012	3	6	440.27	1.19	96.93	18.94	1.2	0
2012	3	7	420.78	1.1	11.97	2.51	0.07	0
2012	3	8	458.95	0.94	37.91	7.12	0.1	0
2012	3	9	377.16	0.79	45.76	8.85	0.57	0
2012	3	10	712.65	2.01	83.56	16.1	1.77	0
2012	3	11	982.31	5.49	86.61	15.5	1.97	0
2012	3	12	4153.29	11.12	328.34	47.99	9.68	0.05
2012	3	13	1067.5	4.94	167.97	32.65	4.41	0
2012	3	14	2964.88	4.86	238.16	32.34	6.41	0
2012	3	15	574.1	1.26	19.73	4.07	0.01	0
2012	3	16	371.07	0.73	21.4	4.25	0.21	0
2012	3	17	221.11	0.42	18.1	3.83	0.01	0	20219.5	94.7	2875.5	508.45	63.57	0.19
2012	4	1	1418.06	37.9	642.86	110.82	21.77	0.16
2012	4	2	550.46	13.63	340.8	60.18	5.02	0
2012	4	3	618.52	8.71	213.2	39.33	4.51	0.05
2012	4	4	1299.26	35.8	626.25	107.42	21.08	0.14
2012	4	5	480.16	4.51	161.55	30.59	3.32	0.02
2012	4	6	230.91	1.62	92.42	18.13	1.57	0
2012	4	7	276.17	1.75	17.03	3.69	0.11	0
2012	4	8	250.22	1.42	40.92	7.59	0.14	0
2012	4	9	204.46	1.03	44.31	8.5	0.75	0
2012	4	10	419.6	3.52	110.78	21.16	2.81	0
2012	4	11	611.91	10.34	110.53	18.66	2.97	0
2012	4	12	1904.44	21.53	467.08	65.97	15.72	0.1
2012	4	13	764	8.53	237.04	45.96	7.7	0
2012	4	14	1242.12	9.92	353.02	47.37	10.71	0
2012	4	15	340.51	1.83	22.02	4.74	0.01	0
2012	4	16	212.6	1.07	23.15	4.66	0.28	0
2012	4	17	136.88	0.59	17.13	3.79	0.02	0	10960.3	163.7	3520.09	598.56	98.49	0.47
2012	5	1	937.65	8.5	109.28	22.83	8.29	0.22
2012	5	2	410.58	2.46	50.64	10.12	1.67	0
2012	5	3	306.8	2.14	39.58	8.9	2.56	0.07
2012	5	4	868.92	7.65	101.92	20.43	7.97	0.2
2012	5	5	182.68	1.14	28.59	6.55	1.98	0.04
2012	5	6	78.59	0.45	17.72	4.5	1.08	0
2012	5	7	166.46	0.74	7.61	2.52	0.11	0
2012	5	8	158.86	0.46	9.82	2.36	0.08	0
2012	5	9	70.55	0.26	6.52	1.4	0.48	0
2012	5	10	241.48	0.92	14.53	3.43	1.18	0
2012	5	11	390.98	2.19	30.89	8.04	1.51	0
2012	5	12	962.63	3.33	49.89	10.4	3.27	0.04
2012	5	13	486.15	2.86	39.41	10.69	3.02	0
2012	5	14	516.05	0.92	19.12	2.54	1.32	0
2012	5	15	216.72	0.86	14.03	4.04	0.02	0
2012	5	16	118.2	0.43	9.09	2.48	0.22	0
2012	5	17	81.37	0.29	8.35	2.79	0.02	0	6194.67	35.6	556.99	124.02	34.78	0.57
2012	6	1	412.04	60.98	1109.34	258.69	51.91	0.75
2012	6	2	299.38	17.39	486.71	104.68	10.04	0
2012	6	3	109.65	15.77	410.14	100.61	13.85	0.23
2012	6	4	445.63	55.33	1016.74	226.29	49.65	0.68
2012	6	5	52.35	8.98	292.64	73.22	10.33	0.13
2012	6	6	22.59	3.85	190.07	52.64	5.68	0
2012	6	7	80.48	4.83	94.34	33.33	0.86	0
2012	6	8	63.85	3.15	108.07	27.59	0.49	0
2012	6	9	19.44	1.82	63.98	14.6	1.78	0
2012	6	10	80.02	7.58	155.07	40.13	6.21	0
2012	6	11	340.28	16.8	330.76	95.66	11.83	0
2012	6	12	583.37	23.68	418.92	106.42	18.79	0.15
2012	6	13	164.56	28.44	644.54	184.09	32.84	0
2012	6	14	270.92	5.04	81.82	11.07	4.35	0
2012	6	15	108.77	5.2	172.81	51.18	0.15	0
2012	6	16	48.55	3.32	101.69	29.05	1.89	0
2012	6	17	35.15	1.91	98.92	34.81	0.12	0	3137.03	264.07	5776.56	1444.06	220.77	1.94
2012	7	1	116.28	310.35	10641.7	2257.83	346.74	2.06
2012	7	2	50.43	89.21	5091.7	1021.93	67.89	0
2012	7	3	36.78	79.02	4118.36	901.01	68.4	0.58
2012	7	4	92.77	287.12	10082.4	2079.76	336.2	1.73
2012	7	5	13.92	49.91	3134.25	691.51	50.56	0.3
2012	7	6	11.32	23.14	1942.37	457.53	25.56	0
2012	7	7	115.96	19.78	569.24	181.5	2.86	0
2012	7	8	52.37	14.54	928.52	206	2.4	0
2012	7	9	14.71	13.71	818.73	167.51	10	0
2012	7	10	46.58	42.72	1777.64	393.25	39.72	0
2012	7	11	151.47	82.43	2618.07	625.75	85.94	0
2012	7	12	113.35	134.25	4492.57	882.87	162.2	0.95
2012	7	13	123.95	131.06	5964.87	1511.18	171.38	0
2012	7	14	16.13	39.69	1584.71	217.78	58.3	0
2012	7	15	180.92	21.21	1065.32	284.91	0.43	0
2012	7	16	44.76	16.33	733.66	184.19	12.37	0
2012	7	17	58.6	7.76	619.54	189.08	0.35	0	1240.3	1362.23	56183.7	12253.6	1441.3	5.62
2012	8	1	776.66	23.88	474.42	82.83	29.41	0.61
2012	8	2	336.69	7.54	251.06	44.85	6.51	0
2012	8	3	269.92	6.16	169.8	31.06	7.19	0.19
2012	8	4	621.32	22.11	461.2	80.07	28.52	0.54
2012	8	5	160.54	3.58	128.43	23.92	5.49	0.1
2012	8	6	81.21	1.49	74.69	14.38	2.62	0
2012	8	7	319.7	1.49	14.07	3.05	0.17	0
2012	8	8	174.93	1.29	36.61	6.79	0.22	0
2012	8	9	77.32	0.87	34.39	6.41	1.31	0
2012	8	10	302.67	3.56	85.54	15.96	4.25	0
2012	8	11	298.55	4.77	86.22	15.46	3.94	0
2012	8	12	461.44	10.78	266.18	39.44	16.75	0.28
2012	8	13	598.38	7.22	173.85	33.62	11.18	0
2012	8	14	137.66	5.23	178.03	23.99	10.81	0
2012	8	15	388.27	1.67	21.42	4.58	0.02	0
2012	8	16	147.48	1.03	21.96	4.37	0.44	0
2012	8	17	152.98	0.68	17.46	3.83	0.03	0	5305.72	103.35	2495.33	434.61	128.86	1.72
2012	9	1	230.96	75.44	2542.18	462.2	142.4	3.01
2012	9	2	108.23	21.41	1381.12	260.53	31.85	0
2012	9	3	85.53	19.66	980.24	183.43	37.8	0.93
2012	9	4	186.32	71.74	2488.56	452.62	138.55	2.74
2012	9	5	49.68	13.36	784.43	147.75	29.63	0.53
2012	9	6	30.82	5.63	462.54	88.01	14.62	0
2012	9	7	112.44	2.36	58.32	11.2	0.53	0
2012	9	8	59.36	2.88	202.8	38.62	0.94	0
2012	9	9	26.73	3.73	233.98	44.76	7.39	0
2012	9	10	123.78	13.77	448.67	85.2	19.28	0
2012	9	11	77.27	7.01	289.22	50.49	11.25	0
2012	9	12	208.74	24.08	907.69	132.26	57.25	1.04
2012	9	13	179.24	21.46	845.78	156.56	53.54	0
2012	9	14	124.33	14.69	610.23	81.8	38.92	0
2012	9	15	128.89	2.2	91.49	18	0.06	0
2012	9	16	49.08	2.56	110.74	21.51	1.89	0
2012	9	17	51.28	1.27	95.35	19.06	0.09	0	1832.68	303.25	12533.3	2254	585.99	8.25
2012	10	1	55.35	36.54	944.94	164.3	59.81	1.15
2012	10	2	20.13	10.3	516.54	94.8	13.08	0
2012	10	3	19.73	8.69	355	64.69	15.89	0.35
2012	10	4	41.9	34.44	926.22	161.01	58.18	1.04
2012	10	5	6.12	5.61	287.42	52.96	12.58	0.2
2012	10	6	4.73	2	173.27	32.5	6.17	0
2012	10	7	54.41	1.47	20.91	4.02	0.22	0
2012	10	8	24.32	1.27	67.87	12.72	0.36	0
2012	10	9	7.19	1.52	82.11	15.51	2.95	0
2012	10	10	30.54	5.49	163	30.55	7.81	0
2012	10	11	27.07	4.77	124.75	20.98	5.51	0
2012	10	12	26.5	14.83	533.4	74.33	31.97	0.43
2012	10	13	56.6	10.3	314.29	57.08	20.59	0
2012	10	14	0.73	8.45	405.69	53.82	22.05	0
2012	10	15	72.52	1.62	30.44	5.99	0.03	0
2012	10	16	21.6	1.14	36.79	7.08	0.7	0
2012	10	17	25.42	0.66	30.41	6.14	0.04	0	494.86	149.1	5013.05	858.48	257.94	3.17
2012	11	1	334.14	180.21	6825.03	1236.99	143.36	0.6
2012	11	2	142.67	54.45	3550.86	661.38	27.9	0
2012	11	3	117.24	47.05	2555.48	482.79	28.75	0.17
2012	11	4	278.58	169.36	6664.19	1206.59	139.36	0.52
2012	11	5	74.25	31.46	2031.24	387.54	21.54	0.09
2012	11	6	37.15	13.92	1196.17	231.03	10.24	0
2012	11	7	167.86	8.95	163.83	32.21	0.68	0
2012	11	8	93.73	8.2	492.7	93.41	0.76	0
2012	11	9	36.14	10.03	582.49	112.18	4.65	0
2012	11	10	150.7	25.22	1171.22	226.74	14.63	0
2012	11	11	139.57	31.41	927.03	160.34	19.31	0
2012	11	12	760.3	77.02	2879.07	423.52	78.55	0.22
2012	11	13	315.68	51.45	2366.64	455.15	40.38	0
2012	11	14	739.8	38.87	1901.53	258.85	49.3	0
2012	11	15	238.17	9.93	227	45.49	0.06	0
2012	11	16	80.59	7.36	277.92	54.4	2.27	0
2012	11	17	72.92	3.86	213.07	43.46	0.08	0	3779.49	768.75	34025.5	6112.07	581.82	1.6
2012	12	1	755.86	196.22	7435.24	1359.53	133.45	0.19
2012	12	2	678.03	59.61	3862.51	726.06	24.17	0
2012	12	3	278.5	51.79	2810.53	534.19	22.36	0.05
2012	12	4	656.8	185.24	7248.78	1324.5	130.03	0.16
2012	12	5	254.71	35.3	2236.08	428.79	16.23	0.03
2012	12	6	142.68	15.96	1312.91	254.32	7.45	0
2012	12	7	400.49	9.24	188.23	36.49	0.49	0
2012	12	8	232.02	8.76	540.9	102.87	0.68	0
2012	12	9	123.65	12.12	654.05	126.26	3.43	0
2012	12	10	376.64	28.6	1460.28	282.57	14.94	0
2012	12	11	830.66	35.66	958.62	164.98	20.48	0
2012	12	12	2773.32	91.12	3609.28	524.09	90.87	0.18
2012	12	13	714.38	56.44	2938.42	567.52	40.61	0
2012	12	14	1875.29	47.98	2602.75	355.27	60.03	0
2012	12	15	558.84	10.15	242.15	47.95	0.05	0
2012	12	16	183.86	8.15	309.97	60.24	2.64	0
2012	12	17	212.13	3.99	231.63	46.68	0.07	0	11047.9	856.33	38642.3	6942.31	567.98	0.61
2013	1	1	1615.62	9.23	171.55	27.76	7.41	0.09
2013	1	2	672.05	3.06	91.13	15.61	1.6	0
2013	1	3	556.94	2.14	51.07	8.9	1.79	0.03
2013	1	4	1430.23	8.8	167.93	27.16	7.18	0.08
2013	1	5	381.95	1.16	38.29	6.92	1.41	0.01
2013	1	6	190.79	0.45	21.9	4.05	0.66	0
2013	1	7	547.43	0.32	3.8	0.69	0.04	0
2013	1	8	404.79	0.22	7.15	1.28	0.04	0
2013	1	9	187.26	0.28	11.48	2.18	0.37	0
2013	1	10	565.08	1.73	69.25	12.93	1.74	0
2013	1	11	902.93	2.34	29.84	4.36	0.9	0
2013	1	12	3821.77	11.76	558.75	75.72	16.38	0.1
2013	1	13	1264.53	2.46	123.71	23.27	4.37	0
2013	1	14	2722.34	8.43	530.29	72.17	13.21	0
2013	1	15	670.59	0.31	2.54	0.47	0	0
2013	1	16	298.11	0.17	3.59	0.67	0.06	0
2013	1	17	218.56	0.09	2.1	0.42	0	0	16451	52.95	1884.37	284.56	57.16	0.31
2013	2	1	1518.75	184.24	6599.14	1206.25	109.76	0.2
2013	2	2	720.68	59.29	3414.34	637.24	21.68	0
2013	2	3	611.95	52.02	2454.37	467.49	19.98	0.06
2013	2	4	1370.97	172.75	6432.2	1173.47	106.67	0.17
2013	2	5	436.9	36.2	1945.83	374.5	14.54	0.03
2013	2	6	228.84	16.66	1138.84	222.43	6.76	0
2013	2	7	600.28	9.82	168.54	34.21	0.44	0
2013	2	8	399.35	8.56	469.26	89.46	0.61	0
2013	2	9	214.9	12.71	564.84	109.24	2.99	0
2013	2	10	596.21	26.98	1225.13	238.12	12.63	0
2013	2	11	1108.73	33.4	916.23	161.37	16.08	0
2013	2	12	3866.81	83.87	3362.89	493.04	74.62	0.15
2013	2	13	1310.72	57.03	2567.35	502.53	33.75	0
2013	2	14	2739.53	43.2	2397.21	327.64	49.22	0
2013	2	15	840.35	11.1	231.5	47.29	0.05	0
2013	2	16	337.32	8.23	273.68	53.98	2.44	0
2013	2	17	251	4.18	204.39	42.72	0.06	0	17153.3	820.24	34365.7	6180.98	472.28	0.61
2013	3	1	2258.39	44.79	1671.67	303.31	34.33	0.08
2013	3	2	928.21	14.74	863.94	160.17	7.58	0
2013	3	3	1096.35	11.59	623.03	118.17	7.63	0.02
2013	3	4	2079.66	42.28	1634.44	296.06	33.3	0.07
2013	3	5	936.95	7.55	500.07	96.01	5.67	0.01
2013	3	6	461	3.34	298.67	58.26	2.72	0
2013	3	7	560.09	1.94	37.77	7.88	0.14	0
2013	3	8	415.02	1.76	114.31	21.77	0.21	0
2013	3	9	409.66	2.14	142.08	27.61	1.19	0
2013	3	10	730.52	5.9	267.36	51.99	3.86	0
2013	3	11	939.39	7.99	230.72	40.83	3.78	0
2013	3	12	3871.22	20.17	806.67	118.77	17.12	0.05
2013	3	13	1310.34	12.28	542.72	105.6	10.24	0
2013	3	14	2752.76	10.51	561.17	76.66	10.95	0
2013	3	15	677.84	2.17	60.56	12.51	0.02	0
2013	3	16	345.2	1.7	64.91	12.85	0.72	0
2013	3	17	262.35	0.81	52.23	10.99	0.02	0	20034.9	191.66	8472.32	1519.44	139.48	0.23
2013	4	1	1720.82	167.38	5770.88	1115.46	122.64	0.37
2013	4	2	912.25	52.72	2910.74	557.62	25.98	0
2013	4	3	709.72	42.63	2133.26	433.49	24.46	0.1
2013	4	4	1584.02	157.99	5568.4	1061.72	118.81	0.3
2013	4	5	598.37	27.91	1664.11	342.75	17.88	0.05
2013	4	6	305.96	12.41	1003.92	216.24	8.61	0
2013	4	7	439.54	7.38	205.14	55.58	0.72	0
2013	4	8	307	6.23	429.97	87.91	0.78	0
2013	4	9	272.95	8.17	456.19	90.88	3.56	0
2013	4	10	622.36	20.53	1016.92	208.03	14.78	0
2013	4	11	959.97	34.22	1040.75	217.16	17.07	0
2013	4	12	2669.46	74.22	3332.69	530.72	72.6	0.24
2013	4	13	1129.55	50.34	2525.15	559.93	45.93	0
2013	4	14	1762.47	33.5	2203.42	303.69	45.93	0
2013	4	15	597.9	8.2	426.17	100.24	0.12	0
2013	4	16	297.39	6.54	305.52	68.67	3.07	0
2013	4	17	225.47	2.84	226.68	60.02	0.1	0	15115.2	713.21	31219.9	6010.11	523.04	1.06
2013	5	1	1421.39	101.85	4221.41	926.95	127.03	0.62
2013	5	2	947.62	28.94	1978.07	406.41	27.65	0
2013	5	3	601.47	26.4	1604.54	362.38	28.17	0.17
2013	5	4	1293.67	94.91	3972.17	845.83	122.29	0.52
2013	5	5	437.88	17.19	1206.02	274.63	20.64	0.08
2013	5	6	220.71	7.98	754	183.68	10.55	0
2013	5	7	433.27	5.38	253.12	82.69	1.37	0
2013	5	8	302.19	3.44	374.61	86.37	1.03	0
2013	5	9	201.5	4.48	309.51	65.45	3.91	0
2013	5	10	713.06	11.21	725.75	166.19	16.66	0
2013	5	11	776.77	26.49	1046.71	261.86	26.56	0
2013	5	12	1942.67	44.59	2017.51	394.03	65.16	0.32
2013	5	13	1101.03	43.13	2407.01	640.14	69.84	0
2013	5	14	1083.53	13.65	861.22	118.02	29.96	0
2013	5	15	591.11	5.52	499.69	135.28	0.21	0
2013	5	16	234.88	5	314.99	81.2	5.39	0
2013	5	17	228.24	1.87	269.01	85.39	0.17	0	12531	442.03	22815.3	5116.5	556.59	1.71
2013	6	1	1387.03	80.34	3110.92	794.5	100.85	0.95
2013	6	2	681	21.95	1306.97	301.54	20.67	0
2013	6	3	397.09	20.84	1198.29	309.15	24.57	0.28
2013	6	4	1290.63	74.21	2812.71	686.49	96.32	0.83
2013	6	5	202.93	13.07	866.6	224.08	18.13	0.15
2013	6	6	83.11	6.04	564.93	157.36	9.58	0
2013	6	7	266.91	4.76	301.65	109.5	1.82	0
2013	6	8	195.95	3.25	320.85	85.66	0.99	0
2013	6	9	67.86	2.98	211.24	50.24	3.29	0
2013	6	10	276.91	11.07	520.54	142.74	13.55	0
2013	6	11	632.78	22.2	990.15	283.46	27.19	0
2013	6	12	1197.23	32.76	1377.91	336.32	44.66	0.27
2013	6	13	495.55	33.3	2222.65	673.18	76.94	0
2013	6	14	502.51	7.27	260.11	35.78	11.22	0
2013	6	15	347.62	4.22	589.49	174.27	0.3	0
2013	6	16	132.28	5.16	307.53	89.46	6.13	0
2013	6	17	121.11	1.68	292.72	103.94	0.21	0	8278.5	345.1	17255.3	4557.67	456.42	2.48
2013	7	1	215.78	1.45	10.04	2.26	2.79	0.35
2013	7	2	145.54	0.36	3.17	0.67	0.66	0
2013	7	3	79	0.35	2.98	0.68	1.15	0.12
2013	7	4	185.12	1.23	8.17	1.63	2.65	0.33
2013	7	5	49.43	0.15	1.41	0.36	0.9	0.07
2013	7	6	26.74	0.06	0.78	0.24	0.45	0
2013	7	7	118.72	0.2	1.93	0.65	0.08	0
2013	7	8	73.96	0.1	1.1	0.28	0.06	0
2013	7	9	20.53	0.04	0.27	0.08	0.32	0
2013	7	10	126.78	0.26	3.11	0.71	0.92	0
2013	7	11	120.53	0.46	3.98	0.86	0.64	0
2013	7	12	275.05	1.03	15.41	2.26	2.45	0.09
2013	7	13	180.45	0.59	10.17	3.01	2.24	0
2013	7	14	131.13	0.49	11.7	1.48	1.58	0
2013	7	15	151.34	0.23	3.41	0.9	0.02	0
2013	7	16	65.16	0.09	1.13	0.3	0.09	0
2013	7	17	60.24	0.07	0.88	0.3	0.01	0	2025.5	7.16	79.64	16.67	17.01	0.96
2013	8	1	393.93	18.54	353.08	61.65	23.55	0.74
2013	8	2	116.68	5.6	187.45	33.72	5.14	0
2013	8	3	112.71	4.7	127.59	23.1	6.29	0.23
2013	8	4	273.81	16.86	343.32	59.74	22.83	0.67
2013	8	5	54.77	2.6	96.06	17.67	4.81	0.13
2013	8	6	32.87	1	55.92	10.58	2.29	0
2013	8	7	162.72	1.47	10.44	2.14	0.17	0
2013	8	8	76.46	1.09	29.3	5.36	0.21	0
2013	8	9	25.9	0.6	24.95	4.62	1.17	0
2013	8	10	125.91	2.36	52.28	9.76	3.1	0
2013	8	11	92.9	3.95	62.08	11.07	3.04	0
2013	8	12	131.09	6.7	104.57	16.53	7.3	0.16
2013	8	13	349.63	5.67	109.53	21.25	7.88	0
2013	8	14	46.78	2.42	42.42	5.61	3.39	0
2013	8	15	176.67	1.85	17.72	3.56	0.03	0
2013	8	16	64.57	0.85	17.52	3.32	0.41	0
2013	8	17	75.88	0.64	14.64	3.02	0.03	0	2313.28	76.9	1648.87	292.7	91.64	1.93
2013	9	1	746.33	179.11	5824.14	1082.43	201.66	1.77
2013	9	2	679.72	61.76	3105.16	590.41	45.57	0
2013	9	3	506.82	51.38	2215.51	419.24	48.46	0.52
2013	9	4	683.83	167.04	5675.19	1054.92	195.7	1.54
2013	9	5	341.98	32.81	1743.38	332.25	36.83	0.27
2013	9	6	168.08	14.68	1022.06	196.75	17.36	0
2013	9	7	156.29	10.12	155.38	29.65	0.94	0
2013	9	8	247.42	11.79	469.11	89.1	1.34	0
2013	9	9	139.01	9.68	507.07	97.13	8.35	0
2013	9	10	716.95	39.25	1177.32	224.23	30.79	0
2013	9	11	86.83	22.47	693.36	123.49	17.82	0
2013	9	12	536.29	55.57	1790.74	272.03	73.66	0.86
2013	9	13	591.22	62.17	2357.34	446.5	87.67	0
2013	9	14	517.03	29.64	1085.14	148.36	46.39	0
2013	9	15	193.75	9.62	221.88	43.01	0.1	0
2013	9	16	198.05	9.93	272.34	52.02	4.95	0
2013	9	17	118.1	5.34	214.5	42.42	0.14	0	6627.7	772.36	28529.6	5243.94	817.73	4.96
2013	10	1	22.27	56.71	2428.5	451.92	56.95	0.53
2013	10	2	14.68	17.35	1258.93	240.22	12.73	0
2013	10	3	6.85	14.95	930.05	177.94	12.98	0.16
2013	10	4	14.37	52.87	2366.62	440.26	55.18	0.46
2013	10	5	2.93	9.64	733.69	141.64	9.76	0.09
2013	10	6	3.7	4.32	432.6	84.58	4.64	0
2013	10	7	39.59	3.05	63.45	12.41	0.29	0
2013	10	8	17.5	2.73	189.73	36.44	0.37	0
2013	10	9	5.76	2.68	208.71	40.51	2.21	0
2013	10	10	19.36	9.79	454.18	87.69	8.6	0
2013	10	11	11.49	8.75	333.9	59.69	6.26	0
2013	10	12	12.4	20.49	853.72	129.92	26.73	0.35
2013	10	13	22.87	19.19	927.22	177.89	24.72	0
2013	10	14	3.71	10.04	510.48	69.74	17.02	0
2013	10	15	49.01	3.16	91.48	18.18	0.03	0
2013	10	16	14.55	2.66	110.08	21.39	1.41	0
2013	10	17	20.04	1.34	85.82	17.45	0.04	0	281.08	239.72	11979.2	2207.87	239.92	1.59
2013	11	1	250.01	14.29	224.5	37.08	17.36	0.36
2013	11	2	71.07	4.27	120.17	21.43	3.71	0
2013	11	3	81.78	3.52	80.18	14.02	4.99	0.11
2013	11	4	187.99	13.25	218.79	36.1	16.86	0.33
2013	11	5	35.58	2.13	61.39	10.94	3.97	0.06
2013	11	6	20.14	0.81	35.72	6.56	2.02	0
2013	11	7	139.01	0.84	6.17	1.18	0.08	0
2013	11	8	66	0.6	16.75	3.07	0.12	0
2013	11	9	23.85	0.58	16.54	3.01	1.01	0
2013	11	10	95.32	1.85	32.67	5.94	2.21	0
2013	11	11	63.24	2.72	41.18	6.75	2.08	0
2013	11	12	58.73	5.81	100.48	13.97	7.6	0.11
2013	11	13	204.55	4.02	68.67	12.35	5.17	0
2013	11	14	2.95	2.67	58.66	7.34	4.64	0
2013	11	15	175.34	0.99	9.82	1.89	0.01	0
2013	11	16	54.36	0.52	9.82	1.83	0.22	0
2013	11	17	58.22	0.33	7.96	1.61	0.01	0	1588.14	59.2	1109.47	185.07	72.06	0.97
2013	12	1	510.49	72.57	2452.84	441.31	55.39	0.29
2013	12	2	168.11	23.5	1273.16	235.36	12.21	0
2013	12	3	170.08	19.4	898.65	168.72	12.48	0.09
2013	12	4	386.86	68.11	2394.02	430.38	53.71	0.26
2013	12	5	82.21	12.41	706.49	134.24	9.34	0.05
2013	12	6	52.23	5.41	414.56	79.99	4.39	0
2013	12	7	261.92	3.58	59.98	11.79	0.23	0
2013	12	8	122.07	3.33	176.13	33.4	0.34	0
2013	12	9	55.2	3.55	199.42	38.37	2.04	0
2013	12	10	201.98	11.06	432.79	83.11	7.06	0
2013	12	11	482.55	13.58	362.39	62.48	5.83	0
2013	12	12	642.94	33.11	1192.88	174.17	29.59	0.14
2013	12	13	549.47	21.75	888.1	169.44	18.81	0
2013	12	14	3.69	16.62	811.66	110.21	19.95	0
2013	12	15	384.7	4.01	82.79	16.56	0.03	0
2013	12	16	110.92	2.99	99.14	19.31	1.02	0
2013	12	17	113.38	1.51	75.39	15.44	0.03	0	4298.8	316.49	12520.4	2224.28	232.45	0.83
2014	1	1	1009.58	63.15	1922.92	336.32	63.14	0.34
2014	1	2	625.24	19.73	1015.84	184	13.65	0
2014	1	3	340.67	16.14	686.98	126.52	14.72	0.1
2014	1	4	875.68	59.74	1884.72	329.48	61.29	0.29
2014	1	5	312.36	10.37	547.14	102.25	11.19	0.05
2014	1	6	143.2	4.46	325.81	61.83	5.22	0
2014	1	7	442.03	2.54	39.77	7.6	0.21	0
2014	1	8	260.61	2.26	125.06	23.36	0.35	0
2014	1	9	141.22	2.64	153.14	29.33	2.4	0
2014	1	10	577.9	7.84	305.7	58.63	6.73	0
2014	1	11	891.19	11.2	269.79	44.59	6.06	0
2014	1	12	2558.03	30.19	1165.29	165.68	32.99	0.12
2014	1	13	958.69	16.27	612.22	114.75	18.47	0
2014	1	14	1455.5	16.52	880.25	120.12	22.52	0
2014	1	15	623.92	2.94	55.21	10.81	0.03	0
2014	1	16	240.55	1.92	66.78	12.93	0.72	0
2014	1	17	198.25	1.01	53.42	10.75	0.03	0	11654.6	268.92	10110	1738.95	259.72	0.9
2014	2	1	1225.91	43.26	1390.56	245.52	42.12	0.25
2014	2	2	870.21	12.66	693.28	127.05	8.53	0
2014	2	3	433.02	11.71	549.6	101.52	10.74	0.07
2014	2	4	1092.87	40.62	1349.81	238.16	40.85	0.22
2014	2	5	416.16	7.6	437.49	81.75	8.18	0.04
2014	2	6	203.53	3.4	259.5	49.13	4.04	0
2014	2	7	454	2.02	41.89	7.99	0.19	0
2014	2	8	320.02	1.81	105.93	19.88	0.25	0
2014	2	9	194.92	1.93	126.07	24.12	1.69	0
2014	2	10	732.81	6.44	242.45	46.08	4.85	0
2014	2	11	923.04	6.57	162.66	27.13	3.76	0
2014	2	12	2732.99	17.94	648.68	92.14	18.98	0.08
2014	2	13	1377.46	11.21	442.1	83.05	11.84	0
2014	2	14	1643.12	9.91	477.33	64.54	12.69	0
2014	2	15	593.05	2.05	44.52	8.69	0.02	0
2014	2	16	266.99	1.48	53.98	10.38	0.51	0
2014	2	17	235.17	0.79	41.09	8.21	0.02	0	13715.3	181.4	7066.94	1235.34	169.26	0.66
2014	3	1	872.25	83.18	2279.4	406.89	64.81	0.33
2014	3	2	706.44	27.29	1186.3	216.98	14.2	0
2014	3	3	297.77	20.99	842.94	157.48	14.36	0.09
2014	3	4	783.49	78.36	2228.24	397.02	62.86	0.28
2014	3	5	285.09	12.72	670.31	127	10.66	0.05
2014	3	6	142.23	5.35	397.33	76.64	5.08	0
2014	3	7	370.58	3.86	52.88	10.79	0.27	0
2014	3	8	231.86	3.16	157.91	29.64	0.39	0
2014	3	9	129.77	3.22	189.53	36.39	2.23	0
2014	3	10	542.62	8.85	370.65	70.93	7.78	0
2014	3	11	707.2	18.46	336.53	58.44	7.31	0
2014	3	12	1968.42	39.17	1156.19	168.75	33.91	0.16
2014	3	13	917.17	21.66	796.53	152.75	21.65	0
2014	3	14	1253.5	17.89	803.2	109.19	22	0
2014	3	15	464.08	4.31	79.3	16.14	0.03	0
2014	3	16	225.51	2.74	88.8	17.35	1.13	0
2014	3	17	190.64	1.46	70.8	14.69	0.04	0	10088.6	352.67	11706.8	2067.07	268.71	0.91
2014	4	1	1005.42	29.15	632.9	111.48	25.64	0.25
2014	4	2	626.65	9.61	331.15	59.68	5.5	0
2014	4	3	343.09	7.16	229.12	42.57	6.37	0.07
2014	4	4	893.58	27.45	618.16	108.32	24.88	0.22
2014	4	5	279.38	4.14	181.28	34.26	4.87	0.04
2014	4	6	125.08	1.66	107.73	20.91	2.43	0
2014	4	7	290.71	1.37	15.45	3.47	0.12	0
2014	4	8	210.39	1.11	42.66	8.02	0.15	0
2014	4	9	124.83	0.96	50.51	9.67	1.08	0
2014	4	10	490.89	2.87	93.32	17.99	2.84	0
2014	4	11	620.8	6.66	103.74	18.43	3.14	0
2014	4	12	1533.7	14.34	342.51	49.99	14.13	0.11
2014	4	13	726.45	6.87	198.67	38.79	7.97	0
2014	4	14	805.49	6.77	234.42	31.38	9.17	0
2014	4	15	369.21	1.44	24.6	5.3	0.02	0
2014	4	16	169.68	0.88	24.48	4.96	0.32	0
2014	4	17	142.47	0.51	20.04	4.41	0.02	0	8757.82	122.95	3250.74	569.63	108.65	0.69
2014	5	1	365.17	37.56	748.15	155.21	36.77	0.52
2014	5	2	245.04	11.35	361.75	71.15	7.66	0
2014	5	3	124.72	9.65	274.11	60.35	9.17	0.16
2014	5	4	322.85	34.56	706.59	142.04	35.46	0.46
2014	5	5	73.35	5.7	201.97	45.34	6.93	0.09
2014	5	6	64.05	2.5	125.3	30.66	3.66	0
2014	5	7	179.59	2.53	42.65	13.66	0.36	0
2014	5	8	110.37	1.79	64.93	14.66	0.29	0
2014	5	9	53.69	1.32	49.08	10.21	1.4	0
2014	5	10	226.14	4.77	116.59	25.82	4.79	0
2014	5	11	256.79	9.19	177.85	45.15	6.38	0
2014	5	12	550.16	16.04	330.12	64.93	17.11	0.23
2014	5	13	373.7	14.95	391.03	95.97	18.55	0
2014	5	14	278.56	5.72	148.73	19.89	8.58	0
2014	5	15	226.14	2.68	75.7	20.93	0.06	0
2014	5	16	88.02	1.68	53.11	13.78	0.84	0
2014	5	17	93.71	1.01	47.14	15.04	0.05	0	3632.05	163	3914.8	844.79	158.06	1.46
2014	6	1	469.19	84.88	3111.82	676.35	87.29	0.85
2014	6	2	733.72	24.99	1447.9	295.85	18.46	0
2014	6	3	133.87	23.18	1204.62	268.7	19.18	0.25
2014	6	4	1061.98	78.1	2938.87	619.84	84.37	0.74
2014	6	5	36.55	14.63	915.47	205.41	14.27	0.14
2014	6	6	11.98	6.71	570.13	136.88	7.12	0
2014	6	7	114.25	5.66	175.72	57.75	0.91	0
2014	6	8	97.79	4.13	274.62	62.87	0.71	0
2014	6	9	10.29	3.89	232.32	48.33	3.06	0
2014	6	10	61.6	12.38	496.13	113.39	11.45	0
2014	6	11	761.46	19.72	718.72	189.24	16.03	0
2014	6	12	1090.44	32.79	1135.37	245.14	36.4	0.38
2014	6	13	146.8	41.17	1928.71	495.21	52.86	0
2014	6	14	340.52	10.22	372.85	50.89	15.49	0
2014	6	15	143.35	5.79	317.46	88.14	0.13	0
2014	6	16	73.52	4.69	221.33	56.95	3.28	0
2014	6	17	36.79	2.3	202.19	63.75	0.11	0	5324.1	375.23	16264.2	3674.69	371.12	2.36
2014	7	1	56.88	8.61	85.47	18.34	10.65	0.55
2014	7	2	26.13	2.43	42.29	8.61	2.38	0
2014	7	3	17.4	2.27	29.93	6.67	3.2	0.18
2014	7	4	48.64	7.61	78.74	16.08	10.23	0.51
2014	7	5	9.04	1.29	20.3	4.59	2.5	0.12
2014	7	6	4.72	0.57	12.86	3.22	1.37	0
2014	7	7	28.29	0.9	7.1	2.37	0.17	0
2014	7	8	17.17	0.54	9.09	2.16	0.14	0
2014	7	9	4.28	0.3	4.57	0.98	0.62	0
2014	7	10	19.59	1.21	12.82	3.01	1.73	0
2014	7	11	28.94	2.19	24.77	6.77	1.97	0
2014	7	12	51.73	3.18	31.87	7.57	3.42	0.09
2014	7	13	36.02	4.11	43.45	11.64	5.8	0
2014	7	14	25.32	0.8	7.5	0.99	1.05	0
2014	7	15	35.78	1.03	13.94	3.91	0.03	0
2014	7	16	14.3	0.52	7.99	2.13	0.33	0
2014	7	17	15.93	0.36	7.35	2.44	0.02	0	440.16	37.92	440.04	101.48	45.61	1.45
2014	8	1	127.27	98.05	3467.91	622.27	124.65	1.12
2014	8	2	56.81	29.15	1813.21	331.97	24.09	0
2014	8	3	47.29	23.19	1334.04	247.02	22.68	0.33
2014	8	4	96.66	91.69	3381.62	606.07	121.6	0.95
2014	8	5	26.44	14.12	1042.57	194.82	16.92	0.18
2014	8	6	17.22	6.01	611.68	115.8	7.98	0
2014	8	7	50.86	5.39	89.26	17.19	0.53	0
2014	8	8	30.4	4.76	276.4	51	0.73	0
2014	8	9	10.69	4	291.19	54.52	3.86	0
2014	8	10	52.95	13.2	586.76	110.16	13.42	0
2014	8	11	21.08	19	476.38	83.49	20.44	0
2014	8	12	41.09	34.81	1027.85	158.67	46.05	0.49
2014	8	13	107.3	26.97	1175.32	222.58	38.48	0
2014	8	14	24	14.02	540.41	74.33	20.88	0
2014	8	15	53.09	5.71	133.21	26.01	0.06	0
2014	8	16	24.98	4.2	157.17	29.86	2.55	0
2014	8	17	23.68	2.37	128.31	25.51	0.08	0	811.81	396.64	16533.3	2971.27	465	3.07
2014	9	1	54.1	54.17	1475.91	271.42	92.84	1.83
2014	9	2	49.04	16.02	812.09	155.09	21.61	0
2014	9	3	17.74	14.63	569.54	107.54	23.82	0.57
2014	9	4	48.97	50.9	1440.59	265.02	90.25	1.65
2014	9	5	20.87	9.76	452.08	86.05	18.39	0.33
2014	9	6	13.4	4.32	270.87	52.29	9.01	0
2014	9	7	12.78	2.44	38.56	7.47	0.43	0
2014	9	8	14.57	2.64	122.28	23.45	0.63	0
2014	9	9	10.05	2.5	128.22	24.73	3.85	0
2014	9	10	49.78	10.71	284.41	53.96	13.27	0
2014	9	11	2.63	5.27	163.78	29.47	7.59	0
2014	9	12	22.93	14.01	417.02	62.43	29.89	0.61
2014	9	13	36.18	17.59	553.52	103.1	37.96	0
2014	9	14	28.91	7.46	252.79	33.54	18.62	0
2014	9	15	13.66	2.45	58.14	11.52	0.06	0
2014	9	16	15.97	2.3	70.75	13.76	1.39	0
2014	9	17	10.8	1.28	58.8	11.85	0.07	0	422.38	218.45	7169.35	1312.69	369.68	4.99
2014	10	1	0	13.7	182.15	31.09	20.7	0.76
2014	10	2	0	3.8	102.4	18.88	5.04	0
2014	10	3	0	3.62	69.72	12.49	5.69	0.24
2014	10	4	0	12.42	177	30.16	20.14	0.7
2014	10	5	0	2.31	55.13	10.04	4.4	0.14
2014	10	6	0	1.01	33.38	6.26	2.16	0
2014	10	7	0.51	1.1	5.83	1.13	0.13	0
2014	10	8	0	0.73	15.36	2.85	0.17	0
2014	10	9	0	0.62	15.25	2.82	1.06	0
2014	10	10	0	2.24	33.97	6.21	2.84	0
2014	10	11	0.82	1.85	26.87	4.7	2.06	0
2014	10	12	1	4.35	73.04	10.27	8.08	0.25
2014	10	13	0	5.04	67.95	12.19	7.56	0
2014	10	14	0.43	2.13	46.89	5.86	5.04	0
2014	10	15	0.98	1.32	9.46	1.84	0.02	0
2014	10	16	0.38	0.66	9.63	1.79	0.34	0
2014	10	17	0.68	0.48	8.22	1.66	0.02	0	4.8	57.38	932.25	160.24	85.45	2.09
2014	11	1	0	8.9	129.17	21.44	10.68	0.31
2014	11	2	0	2.66	70.9	12.79	2.47	0
2014	11	3	0	2.31	48.08	8.44	3	0.1
2014	11	4	0	8.18	126.11	20.93	10.34	0.28
2014	11	5	0	1.46	37.94	6.76	2.33	0.06
2014	11	6	0	0.59	22.72	4.19	1.1	0
2014	11	7	1.8	0.59	3.4	0.65	0.07	0
2014	11	8	0	0.43	9.91	1.84	0.09	0
2014	11	9	0	0.38	10.42	1.9	0.55	0
2014	11	10	0	1.44	22.03	3.9	1.52	0
2014	11	11	3.17	1.34	19.26	3.19	1.11	0
2014	11	12	0.53	3.33	55.91	7.54	4.61	0.09
2014	11	13	4.48	2.83	44.15	7.59	3.87	0
2014	11	14	4.5	1.72	36.65	4.52	2.83	0
2014	11	15	3.79	0.68	5.23	1.03	0.01	0
2014	11	16	1.48	0.37	5.81	1.09	0.15	0
2014	11	17	1.04	0.25	4.86	0.98	0.01	0	20.79	37.46	652.55	108.78	44.74	0.84
2014	12	1	105.29	169.76	5699.99	1027.79	137.64	0.6
2014	12	2	45.78	51.95	2975.03	553.01	27.17	0
2014	12	3	43.68	43.72	2116.31	397.59	28.76	0.17
2014	12	4	85.91	158.86	5562.86	1002.14	133.77	0.51
2014	12	5	22.91	27.84	1675.37	317.98	21.5	0.09
2014	12	6	11.05	12.26	988.97	190.15	10.06	0
2014	12	7	54.45	9.01	140	27.34	0.5	0
2014	12	8	33.44	8.14	412.13	78.09	0.74	0
2014	12	9	11.62	7.98	476.27	91.47	4.56	0
2014	12	10	44.39	25.73	1054.82	202.91	15.45	0
2014	12	11	41.38	29.06	778.04	134.14	17.22	0
2014	12	12	152.76	73.78	2892.31	421.81	72.86	0.21
2014	12	13	76.57	51.16	2120.22	405.44	44.4	0
2014	12	14	113.61	39.63	2077.43	284.9	47	0
2014	12	15	82.85	9.48	185.84	36.97	0.06	0
2014	12	16	26.29	7	230.88	44.96	2.18	0
2014	12	17	23.35	3.92	178.09	36.17	0.08	0	975.33	729.28	29564.6	5252.86	563.95	1.58
2015	1	1	1028.29	146.89	4966.59	892.71	106.18	0.23
2015	1	2	769.46	44.33	2582.98	478.58	21	0
2015	1	3	352.6	38.19	1844.46	347.56	20.75	0.06
2015	1	4	893.12	137.86	4854.91	871.97	103.25	0.19
2015	1	5	365.36	25.1	1467.39	279.91	15.36	0.03
2015	1	6	190.55	11.54	865.86	167.3	7.27	0
2015	1	7	573.23	7.44	113.81	22.22	0.35	0
2015	1	8	337.65	6.56	347.26	65.63	0.55	0
2015	1	9	148.83	7.4	417.93	80.8	3.24	0
2015	1	10	784.99	20.33	850.55	164.29	11.07	0
2015	1	11	805.16	27.14	686.76	116.87	14.3	0
2015	1	12	2809.55	64.7	2322.22	338.15	56.77	0.15
2015	1	13	1134.38	41.89	1707.5	326.64	30.51	0
2015	1	14	2052.54	32.6	1597.72	217.96	35.92	0
2015	1	15	812.87	8.65	158.21	31.38	0.04	0
2015	1	16	299.63	5.96	192.92	37.46	1.84	0
2015	1	17	280.2	3.2	151.04	30.65	0.05	0	13638.4	629.78	25128.1	4470.08	428.45	0.66
2015	2	1	1408	9.29	193.79	32.64	6.76	0.06
2015	2	2	1075.14	3.1	106.02	18.73	1.5	0
2015	2	3	493.39	2.21	61.56	11.07	1.64	0.02
2015	2	4	1248.01	8.74	189.41	31.89	6.54	0.06
2015	2	5	322.43	1.25	47.34	8.75	1.26	0.01
2015	2	6	248.6	0.52	26.83	5.08	0.6	0
2015	2	7	502.8	0.45	4.49	0.83	0.04	0
2015	2	8	366.25	0.33	10.84	1.96	0.04	0
2015	2	9	132.94	0.3	13.8	2.65	0.32	0
2015	2	10	608.96	1.29	40.4	7.7	1.01	0
2015	2	11	753.2	2.09	27.57	4.15	0.76	0
2015	2	12	2844.9	6.39	187.46	25.43	5.51	0.03
2015	2	13	1327.1	2.51	79.99	15.04	2.43	0
2015	2	14	2051.43	3.87	159.08	21.41	4.01	0
2015	2	15	628.26	0.42	4.05	0.76	0	0
2015	2	16	278.66	0.25	5.78	1.09	0.07	0
2015	2	17	262.84	0.14	3.81	0.75	0	0	14552.9	43.15	1162.22	189.93	32.49	0.18
2015	3	1	1021	75.23	2368.73	428.65	60.39	0.28
2015	3	2	658.92	23.77	1224.41	226.81	13.04	0
2015	3	3	367.49	20.38	896.13	169.16	14.03	0.08
2015	3	4	911.5	70.4	2317.77	418.67	58.58	0.24
2015	3	5	257.87	13.28	719.74	137.51	10.56	0.04
2015	3	6	188.12	5.95	429.62	83.41	5.11	0
2015	3	7	346.98	3.92	52.73	10.91	0.24	0
2015	3	8	255.13	3.31	165.99	31.46	0.35	0
2015	3	9	110.78	3.6	203.82	39.49	2.12	0
2015	3	10	461.11	9.13	356.3	69.04	6.4	0
2015	3	11	613.99	14.39	341.62	60.79	6.89	0
2015	3	12	2117.43	29.99	930.9	140.15	24.53	0.09
2015	3	13	933.19	20.7	750.81	145.78	17.15	0
2015	3	14	1466.68	13.22	570.35	77.65	14.3	0
2015	3	15	462.47	4.5	79.75	16.42	0.03	0
2015	3	16	215.29	2.96	92.48	18.25	1.03	0
2015	3	17	189.77	1.69	76.43	16.03	0.04	0	10577.7	316.42	11577.6	2090.18	234.79	0.73
2015	4	1	949.28	41.11	883.41	154.82	35.38	0.29
2015	4	2	678.51	13.24	471.44	85.01	7.83	0
2015	4	3	328.99	10.01	302.58	56.2	8.08	0.08
2015	4	4	851.25	38.59	860.34	149.93	34.31	0.25
2015	4	5	206.34	5.79	234.75	44.48	6.11	0.04
2015	4	6	130.37	2.38	137.78	26.91	2.94	0
2015	4	7	319.43	2.05	24.09	5.35	0.16	0
2015	4	8	243.89	1.49	57.12	10.81	0.2	0
2015	4	9	93.68	1.36	65.87	12.68	1.34	0
2015	4	10	508.65	4.88	173.42	33.33	4.58	0
2015	4	11	605.85	9.42	139.05	24.31	4.03	0
2015	4	12	1536.79	23.81	714.41	101.22	24.92	0.15
2015	4	13	769.65	11.23	362.08	70.98	13.19	0
2015	4	14	883.53	12.69	571.31	77.18	17.61	0
2015	4	15	396.61	2.15	28.24	6.26	0.02	0
2015	4	16	193.53	1.22	32.36	6.61	0.42	0
2015	4	17	155.43	0.71	24.83	5.59	0.02	0	8851.78	182.13	5083.08	871.67	161.14	0.81
2015	5	1	415.61	25.1	527.7	99.7	24	0.3
2015	5	2	222.1	7.53	267.49	50.14	5.04	0
2015	5	3	137.86	6.36	192.68	38.45	6.01	0.09
2015	5	4	367.81	23.22	507.13	93.95	23.21	0.26
2015	5	5	77.96	3.78	147.76	29.88	4.57	0.05
2015	5	6	60.21	1.63	89.21	19.09	2.25	0
2015	5	7	174.85	1.57	21.18	6.06	0.18	0
2015	5	8	127.92	1.08	40.13	8.32	0.17	0
2015	5	9	47.79	0.89	39.33	7.76	1.05	0
2015	5	10	245.69	2.88	84.1	17.14	3.12	0
2015	5	11	273.22	5.81	100.52	21.8	3.52	0
2015	5	12	628.84	11.46	254.75	41.78	12.88	0.14
2015	5	13	396.54	8.29	201.9	44.87	10.14	0
2015	5	14	344.86	4.84	152.73	20.21	7.76	0
2015	5	15	227.39	1.69	30.93	8.21	0.02	0
2015	5	16	98.25	0.96	26.83	6.34	0.41	0
2015	5	17	91.67	0.6	24.08	6.65	0.03	0	3938.57	107.69	2708.45	520.35	104.36	0.84
2015	6	1	876.43	80.75	1956.74	481.54	75.67	0.88
2015	6	2	416.7	22.6	854.71	190.95	14.62	0
2015	6	3	218.44	20.87	708.9	181.79	19.96	0.27
2015	6	4	865.55	73.92	1784.01	418.18	72.38	0.8
2015	6	5	86.71	12.31	505.36	131.48	15.12	0.15
2015	6	6	19.61	5.41	327.53	93.73	8.24	0
2015	6	7	101.01	5.62	175.07	64.7	1.21	0
2015	6	8	83.79	3.69	185.32	49.78	0.66	0
2015	6	9	15.8	2.61	114.44	27.28	2.76	0
2015	6	10	94.03	10.98	314.94	84.06	10.19	0
2015	6	11	399.83	21.81	561.61	170.6	15.91	0
2015	6	12	651.58	32.21	776.25	198.23	28.64	0.18
2015	6	13	191.26	37.67	1387.27	409.78	56.16	0
2015	6	14	245.95	7.63	202.29	27.57	8.86	0
2015	6	15	130.98	5.53	283.1	90.04	0.17	0
2015	6	16	49.98	4.07	171.78	51.84	2.46	0
2015	6	17	44.69	2.11	174.54	64.08	0.15	0	4492.34	349.79	10483.9	2735.63	333.16	2.28
2015	7	1	147.22	70.78	1804.27	399.3	67.24	1.06
2015	7	2	85.38	21.19	856.34	176.35	14.56	0
2015	7	3	47.72	18.53	666.39	154.7	16.34	0.32
2015	7	4	122.46	64.17	1696.12	362.9	64.76	0.94
2015	7	5	21.15	10.85	489.47	115.64	12.12	0.17
2015	7	6	14.84	5.04	307.77	79.43	6.64	0
2015	7	7	97.36	5.76	110.59	37.4	0.78	0
2015	7	8	48.42	3.93	162.66	38.37	0.6	0
2015	7	9	15.22	2.52	117.13	25.13	2.2	0
2015	7	10	64.58	10.27	299.15	69.47	9.35	0
2015	7	11	78.51	18.46	481.95	131.59	14.29	0
2015	7	12	124.88	29.45	774.48	170.83	29.93	0.31
2015	7	13	105.84	34.08	1119.3	294.32	42.76	0
2015	7	14	43.68	8.44	255.4	34.91	11.8	0
2015	7	15	120.38	6.19	184.5	54.72	0.12	0
2015	7	16	39.02	4.16	134.58	36.56	2.62	0
2015	7	17	43.4	2.34	128.32	43.97	0.11	0	1220.06	316.16	9588.42	2225.59	296.22	2.8
2015	8	1	1023.62	23.14	538.61	96.55	32.06	0.83
2015	8	2	469.59	7.52	286.85	52.78	6.96	0
2015	8	3	380.81	6.14	201.8	37.12	8.27	0.26
2015	8	4	922.78	21.4	525.1	94.01	31.12	0.75
2015	8	5	244.67	3.55	156.28	29.06	6.32	0.16
2015	8	6	131.05	1.45	92.47	17.45	3.18	0
2015	8	7	234.68	1.47	14.45	2.8	0.18	0
2015	8	8	189.71	1.42	43.45	8.06	0.24	0
2015	8	9	93.6	0.87	42.67	8.01	1.42	0
2015	8	10	423.05	3.35	92.52	17.37	4.11	0
2015	8	11	84.63	4.1	75.47	13.27	3.45	0
2015	8	12	313.87	7.19	147.92	23.11	8.87	0.17
2015	8	13	610.38	6.37	178.64	33.54	11.64	0
2015	8	14	245.37	2.71	71.88	9.93	4.25	0
2015	8	15	236.2	1.61	21.44	4.2	0.03	0
2015	8	16	150.86	1.07	25.39	4.82	0.5	0
2015	8	17	132.95	0.72	20.76	4.11	0.03	0	5887.82	94.08	2535.7	456.19	122.63	2.17
2015	9	1	74.03	51.34	1334.68	246.84	78.78	1.52
2015	9	2	62.44	15.77	730.28	140.19	18	0
2015	9	3	23.16	14	514.85	97.55	20.35	0.47
2015	9	4	64.96	48.05	1302.12	240.89	76.48	1.36
2015	9	5	21.83	9.19	407.98	77.93	15.77	0.28
2015	9	6	15.23	4.15	244.75	47.34	7.83	0
2015	9	7	32.73	2.55	35.48	6.8	0.39	0
2015	9	8	23.17	2.7	110.1	21.14	0.54	0
2015	9	9	11.91	2.33	115.29	22.32	3.31	0
2015	9	10	59.59	10.4	260.28	49.46	12.09	0
2015	9	11	7.72	5.41	140.84	25.39	6.12	0
2015	9	12	48.61	14.02	370.16	55.36	25.93	0.57
2015	9	13	57.86	16.97	498.6	93.05	34.53	0
2015	9	14	58.29	7.54	228.75	30.43	16.8	0
2015	9	15	35.4	2.57	51.44	10.12	0.05	0
2015	9	16	18.59	2.28	63.07	12.23	1.17	0
2015	9	17	19.62	1.32	52.55	10.52	0.06	0	635.14	210.59	6461.22	1187.56	318.2	4.2
2015	10	1	0	12.21	252.72	44.64	16.17	0.38
2015	10	2	3.18	3.48	136.46	25.54	3.66	0
2015	10	3	0	3.06	96.85	17.86	4.24	0.12
2015	10	4	0	11.27	246.58	43.52	15.69	0.35
2015	10	5	0	1.91	76.42	14.29	3.2	0.07
2015	10	6	0.29	0.79	45.92	8.79	1.5	0
2015	10	7	7.56	0.77	6.68	1.3	0.1	0
2015	10	8	3.58	0.57	20.32	3.85	0.14	0
2015	10	9	0.89	0.47	20.74	3.94	0.73	0
2015	10	10	3.35	2	43.31	7.99	2.46	0
2015	10	11	3.13	1.72	34.38	6.06	1.54	0
2015	10	12	3.77	3.79	80.22	11.73	5.91	0.17
2015	10	13	6.24	3.87	84.61	15.22	6.65	0
2015	10	14	1.09	1.75	45.83	5.85	3.6	0
2015	10	15	9.64	0.89	10.59	2.11	0.01	0
2015	10	16	2.96	0.51	11.92	2.29	0.25	0
2015	10	17	3.95	0.34	10.15	2.07	0.02	0	49.63	49.4	1223.7	217.05	65.87	1.09
2015	11	1	85.7	184.88	6596.58	1199.82	166.44	0.99
2015	11	2	32.28	58.21	3421.67	638.89	35.52	0
2015	11	3	28.26	50.02	2483.73	467.69	38.96	0.29
2015	11	4	68.07	172.27	6445.07	1171.6	161.52	0.87
2015	11	5	15.67	32.12	1971.82	375.09	29.42	0.16
2015	11	6	11.08	14.34	1171.2	225.59	14.14	0
2015	11	7	65.62	10.3	155.96	30.45	0.66	0
2015	11	8	30.94	9.37	484.93	92.03	1.01	0
2015	11	9	11.4	8.92	554.83	106.77	6.32	0
2015	11	10	36.13	29.41	1128.53	216.82	20.48	0
2015	11	11	44.18	30.43	917.29	160.53	17.35	0
2015	11	12	39.26	73.58	2819.93	419.37	73.29	0.33
2015	11	13	80.43	59.57	2264.99	431.1	58.48	0
2015	11	14	1.74	37.3	1860.57	255.51	45.93	0
2015	11	15	85.63	11.47	226.66	45.01	0.08	0
2015	11	16	26.24	8.47	271.43	52.59	3.27	0
2015	11	17	26.57	4.68	217.7	44.12	0.1	0	689.2	795.34	32992.9	5932.98	672.97	2.64
2015	12	1	744.55	163.54	6705.77	1226.42	154.22	0.54
2015	12	2	439.6	46.53	3470.21	652.25	29.54	0
2015	12	3	251.76	41.39	2566.92	487.8	28.33	0.15
2015	12	4	633.22	154.57	6551.92	1197.77	150.22	0.45
2015	12	5	138.45	27.9	2052.05	393.46	20.94	0.07
2015	12	6	106.58	12.82	1219.63	235.97	9.88	0
2015	12	7	356.98	7.13	157.29	30.43	0.52	0
2015	12	8	227.29	6.39	490.12	93.26	0.82	0
2015	12	9	95.3	8.57	589.28	114.11	4.38	0
2015	12	10	402.59	22.9	1172.72	226.79	16.22	0
2015	12	11	474.12	28.58	860.3	148.49	21.09	0
2015	12	12	1425.39	69.56	2736.96	403.7	75.53	0.27
2015	12	13	752.14	45.13	2320.29	444.49	43.53	0
2015	12	14	1017.56	35.63	1831.61	250.93	46.1	0
2015	12	15	487.44	7.49	226	44.5	0.06	0
2015	12	16	189.71	6.02	275.46	53.51	2.69	0
2015	12	17	176.66	2.88	218.16	43.77	0.08	0	7919.34	687.03	33444.7	6047.65	604.15	1.48
2016	1	1	1228.06	205.08	7810.7	1444.34	141.09	0.13
2016	1	2	794.31	65.13	3992.22	752.31	33.31	0
2016	1	3	425.55	59.45	3031.97	579.47	22.5	0.04
2016	1	4	1078.76	188.24	7622.3	1409.93	136.46	0.11
2016	1	5	274.67	41.67	2426.19	466.85	16.8	0.02
2016	1	6	294	19.01	1430.84	278.44	6.42	0
2016	1	7	733.02	14.58	192.06	37.47	0.65	0
2016	1	8	408.08	11.68	585.56	111.63	1	0
2016	1	9	215.08	14.41	710.04	137.64	2.89	0
2016	1	10	639	29.69	1350.47	263.12	11.21	0
2016	1	11	1198.68	34.1	1021.43	180.61	17	0
2016	1	12	2951.9	72.75	2728.62	413.43	60.57	0.1
2016	1	13	1687.05	64.62	2758.01	535.47	28.85	0
2016	1	14	1756.91	31.77	1654.67	227.47	36.28	0
2016	1	15	923.59	16.87	271.99	53.85	0.05	0
2016	1	16	344.07	10.73	336.38	65.5	2.66	0
2016	1	17	339.85	6.31	259.63	52.39	0.06	0	15292.6	886.09	38183.1	7009.92	517.8	0.4
2016	2	1	1373.86	80.56	2916.57	520	64.77	0.23
2016	2	2	666.37	24.57	1525.27	279.5	14.49	0
2016	2	3	493.68	21.2	1048	195.54	13.21	0.06
2016	2	4	1220.82	75.37	2845.34	506.88	62.76	0.19
2016	2	5	335.82	13.71	827.39	156.62	9.69	0.03
2016	2	6	142.57	6.4	487.72	93.66	4.47	0
2016	2	7	548.81	4.15	72.73	14.08	0.28	0
2016	2	8	389.35	3.03	195.66	36.7	0.38	0
2016	2	9	157.66	3.86	236.58	45.52	2.08	0
2016	2	10	543.9	13.75	663.27	126.64	9.63	0
2016	2	11	899	15.59	396.06	66.63	6.75	0
2016	2	12	3393.11	49.37	2367.94	335.8	51.03	0.19
2016	2	13	1022.54	27.79	1288.15	246.87	25.32	0
2016	2	14	2516.13	29.5	1954.18	268.7	37.21	0
2016	2	15	603.8	4.62	85.67	16.94	0.03	0
2016	2	16	319.24	3.01	107.7	20.73	1.25	0
2016	2	17	235.32	1.51	81.22	16.42	0.04	0	14862	377.99	17099.4	2947.23	303.39	0.7
2016	3	1	1702.15	54.33	1424.58	256.17	36.24	0.2
2016	3	2	686.68	18.82	740.24	136.35	8.03	0
2016	3	3	691.96	13.56	536.08	100.7	8.22	0.06
2016	3	4	1539.53	51.38	1394.56	250.35	35.16	0.17
2016	3	5	502.22	8.03	432.47	82.25	6.11	0.03
2016	3	6	247.84	3.2	258.44	49.88	2.89	0
2016	3	7	518.43	2.36	31.02	6.33	0.15	0
2016	3	8	377.68	2.18	97.62	18.4	0.22	0
2016	3	9	202.45	2.03	123.58	23.87	1.33	0
2016	3	10	538.11	5.71	221.42	42.75	4.06	0
2016	3	11	802.13	11.95	194.97	34.01	3.99	0
2016	3	12	2981.87	23.82	618.53	91.24	16.34	0.07
2016	3	13	1350.94	12.48	445.11	85.51	10.8	0
2016	3	14	2107.12	10.43	412.15	56.23	10.14	0
2016	3	15	532.47	2.44	46.83	9.53	0.02	0
2016	3	16	322.56	1.71	54.44	10.71	0.48	0
2016	3	17	212.37	0.91	44.49	9.2	0.02	0	15316.5	225.34	7076.53	1263.48	144.2	0.53
2016	4	1	1333.14	17.91	450.12	82.38	14.95	0.09
2016	4	2	631.49	5.78	233.05	43.18	3.32	0
2016	4	3	519.16	4.42	164.14	31.51	3.4	0.02
2016	4	4	1217.79	16.8	437.93	79.62	14.46	0.07
2016	4	5	386.45	2.53	128.02	24.95	2.57	0.01
2016	4	6	224.28	1.03	75.89	15.23	1.23	0
2016	4	7	339.92	0.91	12.56	2.94	0.09	0
2016	4	8	263.13	0.67	32.27	6.25	0.11	0
2016	4	9	153.02	0.63	35.24	6.87	0.61	0
2016	4	10	378.29	1.91	80.03	15.58	2.16	0
2016	4	11	624.24	4.45	71.72	13.61	1.91	0
2016	4	12	1819.03	10.18	276.73	40.86	10.66	0.08
2016	4	13	890.47	4.89	173.07	35	5.88	0
2016	4	14	1159.87	5.04	203.15	27.32	7.37	0
2016	4	15	337.54	0.96	17.89	4.06	0.01	0
2016	4	16	204.42	0.57	19.14	4	0.22	0
2016	4	17	170.76	0.33	15.68	3.62	0.01	0	10653	79.01	2426.63	436.98	68.96	0.27
2016	5	1	400.45	62.48	2136.94	443.58	50.98	0.39
2016	5	2	166.89	19.25	1037.98	204.79	11.68	0
2016	5	3	159	16.91	793.76	171.9	11.03	0.11
2016	5	4	356.59	57.46	2035.39	412.21	49.19	0.33
2016	5	5	102.69	10.65	601.78	132.04	8.07	0.05
2016	5	6	52.73	4.88	367.05	86.31	3.99	0
2016	5	7	190.55	4.3	102.89	31.97	0.48	0
2016	5	8	100.6	2.97	174.25	38.25	0.4	0
2016	5	9	42.1	3	156.72	32	1.65	0
2016	5	10	137.84	8.27	373.97	80.72	7.53	0
2016	5	11	240.8	15.25	439.04	112.59	9.38	0
2016	5	12	537.21	26.08	887.42	172.83	26.21	0.17
2016	5	13	322.45	27.74	1190.72	294.78	29.51	0
2016	5	14	385.32	8.69	434.68	59.3	13.62	0
2016	5	15	232.48	4.63	156.56	43.86	0.06	0
2016	5	16	78.37	3.23	129.71	32.41	1.79	0
2016	5	17	90.98	1.72	117.73	36.58	0.06	0	3597.05	277.51	11136.6	2386.12	225.63	1.05
2016	6	1	492.1	188.33	6434.89	1582.76	151.38	0.8
2016	6	2	219.59	50.74	2834.47	634	28.1	0
2016	6	3	132.95	46.62	2445.48	617.05	30.05	0.23
2016	6	4	458.97	172.98	5904.61	1387.98	145.86	0.69
2016	6	5	61.31	29.1	1803.05	457.78	22.05	0.13
2016	6	6	19.01	13.4	1152.7	317.62	11.34	0
2016	6	7	110.02	13.15	533.46	196.98	2.04	0
2016	6	8	73.84	8.76	606.31	157.65	1.17	0
2016	6	9	18.07	7.92	448.56	103.33	4.18	0
2016	6	10	84.73	25.72	1136.92	295.13	19.34	0
2016	6	11	229.45	53.94	1715.02	500.83	43.76	0
2016	6	12	408.09	82.17	2692.2	632.62	82.25	0.44
2016	6	13	164.68	91.13	4782.5	1400.67	102.58	0
2016	6	14	223.16	21.43	834.95	114.18	30.19	0
2016	6	15	134.91	13.15	927.1	280.79	0.3	0
2016	6	16	51.04	11.2	553.73	160.51	7.31	0
2016	6	17	51.91	4.96	502.42	181.05	0.24	0	2933.83	834.7	35308.4	9020.93	682.14	2.29
2016	7	1	161.49	198.21	6455.04	1235.41	222.53	1.6
2016	7	2	75.32	62.39	3262.05	615.98	54.79	0
2016	7	3	45.89	50.75	2493.58	491.3	38.82	0.46
2016	7	4	112.07	180.77	6234.22	1178.75	216.64	1.36
2016	7	5	20.12	31.85	1937.01	384.41	28.86	0.25
2016	7	6	20.26	14.51	1150.97	236.4	14.11	0
2016	7	7	147.46	15.73	226.24	58.36	1.53	0
2016	7	8	63.26	10.93	526.32	104.54	1.29	0
2016	7	9	21.18	9.85	545.06	105.3	6.16	0
2016	7	10	67.49	28.49	1129.46	225.23	23.43	0
2016	7	11	101.99	43.71	1212.69	249.71	38.75	0
2016	7	12	142.33	77.52	2443.17	418.25	96.07	0.72
2016	7	13	154.48	72.98	2788.78	609.77	77.87	0
2016	7	14	48.32	26.48	1103.32	151.83	45.11	0
2016	7	15	206.48	17.3	368.36	87.83	0.14	0
2016	7	16	57.4	10.45	342.52	74.39	5.31	0
2016	7	17	69.31	6.35	278.85	69.31	0.16	0	1514.85	858.27	32497.6	6296.77	871.57	4.39
2016	8	1	542.21	113.11	3347.28	582.21	145.11	1.92
2016	8	2	506.14	36.27	1758.27	312.02	32.51	0
2016	8	3	194.74	29.25	1237.35	222.9	33.55	0.57
2016	8	4	448.55	105.23	3265.91	567.07	140.89	1.68
2016	8	5	238.57	17.53	962.68	175.41	25.31	0.31
2016	8	6	136.41	7.25	563.63	104.45	11.79	0
2016	8	7	434.26	6.53	85.42	16.5	0.6	0
2016	8	8	256.63	5.9	255.03	46.28	0.93	0
2016	8	9	130.48	4.62	269.09	49.34	5.58	0
2016	8	10	501.74	17.53	572.98	105.32	18.12	0
2016	8	11	197.88	21.54	522.09	89.59	16.83	0
2016	8	12	524.95	47.64	1412.04	208.66	63.73	0.78
2016	8	13	1175.76	33.65	1170.11	216.17	49.91	0
2016	8	14	496.11	22.36	872.91	117.83	38.79	0
2016	8	15	518.84	7.07	126.25	24.48	0.08	0
2016	8	16	235.7	4.93	147.39	27.61	2.47	0
2016	8	17	250.56	2.89	115.57	22.87	0.1	0	6789.53	483.3	16684	2888.71	586.3	5.26
2016	9	1	1188.65	28.43	648.11	113.88	41.36	0.77
2016	9	2	606.78	8.53	346.44	63.43	9.15	0
2016	9	3	451.91	7.76	249.13	45.57	10.84	0.24
2016	9	4	1107.35	26.47	632.98	111.12	40.21	0.7
2016	9	5	291.35	4.96	198.26	36.61	8.42	0.14
2016	9	6	145.37	2.09	118.34	22.23	4.06	0
2016	9	7	227.61	1.58	16.43	3.19	0.18	0
2016	9	8	203.61	1.6	51.06	9.55	0.27	0
2016	9	9	123.21	1.35	55.92	10.48	1.99	0
2016	9	10	492.53	4.4	110.86	20.76	5.06	0
2016	9	11	119.29	3.71	91.13	15.66	4.37	0
2016	9	12	841.25	8.78	275.53	40.63	17.05	0.26
2016	9	13	529.67	7.96	213.25	39.34	12.83	0
2016	9	14	720.2	4.26	182.41	25.09	10.37	0
2016	9	15	235.64	1.7	24.34	4.8	0.02	0
2016	9	16	163.14	1.25	28.91	5.55	0.54	0
2016	9	17	132.69	0.82	23.36	4.7	0.03	0	7580.25	115.65	3266.46	572.59	166.75	2.11
2016	10	1	124.01	140.72	5840.31	1063.08	177.83	1.19
2016	10	2	79.69	42.23	3055.53	571.52	38.46	0
2016	10	3	47.54	36.66	2218.81	416.55	43.59	0.36
2016	10	4	103.24	132.27	5699.52	1037.1	172.65	1.06
2016	10	5	26.2	23.85	1768.93	334.63	33.46	0.19
2016	10	6	23.31	10.51	1052.82	201.23	16.61	0
2016	10	7	96.99	6.36	146.8	28.31	0.74	0
2016	10	8	48.99	6.22	441.45	83.77	1.07	0
2016	10	9	26.35	6.18	504.18	96.61	7.03	0
2016	10	10	86.79	23.67	1088.23	208.85	22.48	0
2016	10	11	82.85	19.89	738.11	128.85	17.41	0
2016	10	12	182.67	60.85	2823.85	411.91	94.23	0.62
2016	10	13	130.15	43.53	2124.25	402.87	64.41	0
2016	10	14	121.59	35.5	2054.17	281.38	64.23	0
2016	10	15	124.53	6.41	197.23	38.82	0.08	0
2016	10	16	42.2	5.86	244.55	47.29	3.63	0
2016	10	17	46.95	2.91	192.39	38.66	0.11	0	1394.05	603.62	30191.1	5391.43	758.02	3.42
2016	11	1	1063.49	255.23	11193.3	2043.14	239.37	0.54
2016	11	2	540.34	74.31	5772.15	1081.74	46.6	0
2016	11	3	372.62	64.74	4278.05	812.18	46.94	0.15
2016	11	4	935.57	240.99	10949.4	1997.63	233	0.45
2016	11	5	261.24	43.67	3435.15	657.93	35.05	0.07
2016	11	6	123.1	19.91	2046.07	395.72	16.83	0
2016	11	7	475.2	11.16	249.49	48.78	0.77	0
2016	11	8	346.15	10.22	803.75	153.07	1.23	0
2016	11	9	149.53	12.95	984.62	190.72	7.19	0
2016	11	10	481.07	34.91	1871.85	363.06	23.67	0
2016	11	11	715.7	42.09	1460.91	253.81	30.96	0
2016	11	12	3208.72	104.44	4798.22	709.7	113.78	0.24
2016	11	13	958.77	71.17	3721.03	714.14	65.53	0
2016	11	14	2507.04	53.79	3253.86	447.81	69.54	0
2016	11	15	619.59	12.3	376.97	74.77	0.09	0
2016	11	16	274.94	9.82	451.47	87.97	4.32	0
2016	11	17	208.88	4.81	364.2	73.63	0.13	0	13242	1066.51	56010.5	10105.8	935	1.45
2016	12	1	1829.07	50.72	1310.84	230.8	34.74	0.21
2016	12	2	981.12	17.56	704.14	128.2	7.52	0
2016	12	3	654.64	13.26	460.02	85.29	7.77	0.06
2016	12	4	1631.23	48.11	1284.37	226.07	33.71	0.18
2016	12	5	479.81	8.56	369.81	69.67	5.83	0.03
2016	12	6	202.08	3.7	216.44	41.37	2.76	0
2016	12	7	569.24	2.05	27.52	5.23	0.13	0
2016	12	8	490	1.77	79.07	14.75	0.18	0
2016	12	9	209.36	2.55	109.83	21.22	1.27	0
2016	12	10	840.11	6.38	246.88	47.72	4.24	0
2016	12	11	1063.33	9.58	163	26.47	3.36	0
2016	12	12	4775.6	26.76	927.05	129.86	24	0.11
2016	12	13	1115.84	12.82	482.52	91.62	11.04	0
2016	12	14	3633.7	15.32	756.1	103.19	17.4	0
2016	12	15	713.74	2.08	31.38	6.12	0.01	0
2016	12	16	415.6	1.48	43.24	8.36	0.37	0
2016	12	17	273.36	0.74	31.69	6.36	0.02	0	19877.8	223.44	7243.9	1242.3	154.35	0.59
2017	1	1	2165.29	86.9	2852.44	511.75	62.74	0.19
2017	1	2	962.14	29.26	1492.38	274.74	13.82	0
2017	1	3	950.41	23.46	1051.07	197.67	13.03	0.05
2017	1	4	1986.53	81.83	2796.25	501.67	60.83	0.15
2017	1	5	796.34	15.87	849.03	161.75	9.6	0.02
2017	1	6	391.68	7.09	502.83	96.93	4.54	0
2017	1	7	585.89	4.04	57.65	11.14	0.22	0
2017	1	8	325.75	3.48	185.62	34.92	0.36	0
2017	1	9	342.34	5.02	245.85	47.76	1.97	0
2017	1	10	809.79	10.96	453.84	87.99	6.85	0
2017	1	11	1137.58	14.99	376.3	63.6	6.81	0
2017	1	12	4681.7	36.72	1393.89	201.65	32.03	0.1
2017	1	13	1294.38	23.81	894.67	170.25	17.56	0
2017	1	14	3428.68	18.81	995.18	136.26	20.85	0
2017	1	15	822.7	4.66	81.13	16	0.03	0
2017	1	16	425.82	3.31	101.32	19.57	1.15	0
2017	1	17	292.53	1.7	80.86	16.33	0.04	0	21399.5	371.91	14410.3	2549.98	252.43	0.51
2017	2	1	1659.92	178.01	6021.05	1087.86	104.92	0.2
2017	2	2	774.31	54.81	3122.79	578.97	20.06	0
2017	2	3	805.78	48.02	2248.63	425.42	17.53	0.05
2017	2	4	1532.34	165.7	5876.27	1059.8	102.17	0.16
2017	2	5	778.18	33.13	1792.13	342.59	12.65	0.02
2017	2	6	388.28	15.36	1046.85	202.86	5.81	0
2017	2	7	396.85	10.82	146.83	29.34	0.39	0
2017	2	8	247.49	8.36	419.11	79.37	0.55	0
2017	2	9	333.22	11.71	527.04	101.41	2.65	0
2017	2	10	599.5	25.39	1103.93	213.49	11.71	0
2017	2	11	768.9	30.45	814.35	141.56	12.78	0
2017	2	12	3601.1	77.08	3067.71	446.92	69.51	0.17
2017	2	13	932.17	55.97	2323.72	451.54	30.89	0
2017	2	14	2974.81	40.34	2207.61	301	49.7	0
2017	2	15	595.01	12.6	194.53	39.23	0.04	0
2017	2	16	323.25	7.99	241.34	47.14	2.01	0
2017	2	17	206.58	4.46	181.5	37.32	0.06	0	16917.7	780.2	31335.4	5585.82	443.43	0.6
2017	3	1	2798.78	65.83	2102.4	377.56	48.4	0.16
2017	3	2	1192.69	22.2	1098.23	201.46	11.08	0
2017	3	3	1394.7	17.07	770.21	145.05	9.8	0.04
2017	3	4	2588.76	61.62	2058.31	369.15	46.92	0.13
2017	3	5	1215.42	10.97	618.9	118.2	7.15	0.02
2017	3	6	627.83	4.8	365.6	70.89	3.33	0
2017	3	7	652.44	3.47	45.35	9.17	0.19	0
2017	3	8	545.29	2.76	136.51	25.68	0.28	0
2017	3	9	556.63	3.34	179.64	34.82	1.52	0
2017	3	10	960.22	8.98	365.19	70.47	6.05	0
2017	3	11	1099.77	12.25	284.68	48.83	5.51	0
2017	3	12	5089.6	33.91	1330.55	190.3	34.55	0.15
2017	3	13	1574.35	18.59	725.82	139.9	14.84	0
2017	3	14	3863	19.02	1032.16	140.82	24.45	0
2017	3	15	781.45	3.89	62.51	12.67	0.02	0
2017	3	16	474.82	2.51	75.82	14.84	0.8	0
2017	3	17	297.66	1.41	60.19	12.4	0.03	0	25713.4	292.62	11312.1	1982.21	214.92	0.5
2017	4	1	1932.35	107.11	2893.37	524.4	68.65	0.27
2017	4	2	1088.74	36.61	1488.95	271.33	15.69	0
2017	4	3	893.93	26.93	1049.38	199.64	13.91	0.07
2017	4	4	1786.99	100.04	2815.21	506.22	66.47	0.21
2017	4	5	803.08	16.38	824.99	159.27	10.14	0.03
2017	4	6	463.16	6.83	488.24	97.27	4.8	0
2017	4	7	535.67	5.94	79.74	19.08	0.34	0
2017	4	8	398.68	4.38	199.4	38.15	0.43	0
2017	4	9	388.81	4.61	230.82	44.26	2.07	0
2017	4	10	770.25	11.41	471.55	91.38	8.13	0
2017	4	11	882.8	24.95	456.93	86.45	9.04	0
2017	4	12	2970.13	50.6	1510.97	228.13	38.54	0.15
2017	4	13	1368.1	30.27	1063.82	216.23	23.01	0
2017	4	14	2230.12	21.96	1032.87	140.22	24.33	0
2017	4	15	651.83	6.76	119.21	26.83	0.04	0
2017	4	16	348.95	4.06	118.62	24.51	1.46	0
2017	4	17	302.12	2.22	95.82	22.09	0.05	0	17815.7	461.06	14939.9	2695.46	287.1	0.73
2017	5	1	1733.71	26.6	670.15	127.05	21.04	0.14
2017	5	2	903.91	8.89	339.16	63.02	4.67	0
2017	5	3	810.87	6.88	240.89	48.22	4.76	0.04
2017	5	4	1587.56	24.77	647.52	120.7	20.34	0.12
2017	5	5	627.58	4.22	187.24	38.12	3.53	0.02
2017	5	6	309.73	1.84	112.19	24.11	1.71	0
2017	5	7	519.9	1.54	23.2	6.59	0.14	0
2017	5	8	340.54	1.15	46.66	9.43	0.15	0
2017	5	9	272.51	1.2	50.99	9.98	0.79	0
2017	5	10	875.17	3.31	109.84	22.11	2.77	0
2017	5	11	778.2	6.08	120.61	25.76	3.14	0
2017	5	12	2321.47	14.44	415.94	64.94	14.53	0.09
2017	5	13	1392.47	8.35	273.79	60.63	8.05	0
2017	5	14	1417.58	7.31	291.07	39.06	9.52	0
2017	5	15	603.29	1.65	35.35	8.96	0.02	0
2017	5	16	277.74	1.03	30.78	7.1	0.35	0
2017	5	17	233.72	0.6	25.47	6.9	0.02	0	15005.9	119.86	3620.85	682.68	95.53	0.41
2017	6	1	1462.31	133.99	4203.85	1040.08	115.45	0.65
2017	6	2	868.41	40.46	1864.56	415.48	24.66	0
2017	6	3	432.43	36.52	1588.3	403.52	26	0.18
2017	6	4	1466.92	122.05	3871.5	917.01	110.69	0.54
2017	6	5	236.41	22.7	1173.94	300.22	18.93	0.09
2017	6	6	97.52	10.54	751.12	209.41	9.66	0
2017	6	7	272.34	10.28	336.24	124.78	1.69	0
2017	6	8	180.01	7.16	390.54	102.14	1	0
2017	6	9	77.95	6.1	287.81	66.39	3.57	0
2017	6	10	334.28	19.58	715.29	187.23	15.72	0
2017	6	11	744.3	34.1	1094.21	338.17	26.26	0
2017	6	12	1424.48	53.33	1641.86	411.9	50.15	0.27
2017	6	13	554.54	70.46	3019.18	896.48	82.2	0
2017	6	14	642.68	14.67	492.74	67.91	17.33	0
2017	6	15	305.91	10.38	543.61	171.98	0.22	0
2017	6	16	131.27	8.48	347.47	102.78	5.96	0
2017	6	17	113.39	4.05	340.63	124.5	0.2	0	9345.15	604.85	22662.9	5879.98	509.69	1.73
2017	7	1	455.96	297.29	10531.1	2408.07	275.65	1.51
2017	7	2	189.08	89.19	4842.5	1017.57	60.11	0
2017	7	3	158.04	82.5	4012.32	940.47	61.98	0.42
2017	7	4	377.34	272.36	9854.81	2171.63	265.36	1.26
2017	7	5	70.23	52.76	3006.72	710.85	45.37	0.21
2017	7	6	41.35	24.91	1880.83	481.13	22.75	0
2017	7	7	329.01	21.25	682.24	240.03	3.07	0
2017	7	8	140.8	14.96	944.85	225.8	2.27	0
2017	7	9	50.94	14.7	774.86	166.59	8.7	0
2017	7	10	176.18	44.89	1859.02	438.47	37.38	0
2017	7	11	374.32	82.64	2785.07	709.7	73.73	0
2017	7	12	495.12	138.21	5073.59	1024.08	153.37	0.68
2017	7	13	400.69	142.78	6547.39	1787.7	163.81	0
2017	7	14	120.12	42.7	1944.77	268.01	60.88	0
2017	7	15	429.05	22.4	1347.62	377.37	0.49	0
2017	7	16	130.72	17.77	808.89	218.66	12.7	0
2017	7	17	137.39	8.13	672.54	227.56	0.36	0	4076.34	1369.44	57569.1	13413.7	1247.98	4.08
2017	8	1	2581.56	74.26	2410.44	413.79	116.96	1.51
2017	8	2	1146.72	22.72	1251.84	219.14	24.91	0
2017	8	3	939.37	19.72	927.12	163.93	28.25	0.44
2017	8	4	2250.14	69.36	2353.11	403.11	113.55	1.32
2017	8	5	525.91	12.23	733.53	130.75	21.43	0.24
2017	8	6	322.23	5.14	434.5	78.57	10.22	0
2017	8	7	836.89	3.9	60.12	11.68	0.48	0
2017	8	8	532.73	3.66	186.23	33.32	0.72	0
2017	8	9	252.05	3.25	209.08	37.42	4.85	0
2017	8	10	1063.23	10.95	398.8	71.7	13.79	0
2017	8	11	560.68	12.5	366.59	63.08	13.33	0
2017	8	12	1298.02	28.85	923.08	136.92	49.32	0.66
2017	8	13	2236.31	20.68	796.12	144.3	36.35	0
2017	8	14	692.59	14.2	548.01	73.56	29.74	0
2017	8	15	796.58	4.06	96.62	18.5	0.06	0
2017	8	16	395.08	3.13	109.08	19.95	2.25	0
2017	8	17	371.21	1.8	89.87	17.4	0.08	0	16801.3	310.41	11894.1	2037.12	466.29	4.17
2017	9	1	1646.34	552.29	29149.9	5398.76	698.55	2.4
2017	9	2	873.55	162.84	15151.5	2866.37	142.85	0
2017	9	3	636.18	140.97	11248.3	2140.52	130.09	0.67
2017	9	4	1461.94	520.66	28434.4	5263.69	679.43	2
2017	9	5	428.75	94.32	8896.43	1701.86	96.18	0.33
2017	9	6	215.05	43.14	5138.75	988.92	44.96	0
2017	9	7	455.78	24.96	741.02	142.64	3.73	0
2017	9	8	347.7	28.37	2332.3	444.49	4.25	0
2017	9	9	190.57	29.17	2694.49	520.03	21.1	0
2017	9	10	745.2	104.35	5522.92	1069.03	84.16	0
2017	9	11	343.51	67.31	3199.24	558.74	83.45	0
2017	9	12	1161.37	209.4	11290.2	1669.92	385.5	1.93
2017	9	13	919.94	162.18	10379.7	1996.71	217.19	0
2017	9	14	982.43	123.27	7925.85	1096.15	256.01	0
2017	9	15	545.75	23.11	1042.92	204.68	0.28	0
2017	9	16	317.38	25.78	1285.51	249.4	15.17	0
2017	9	17	245.16	12.45	1044.02	208.18	0.42	0	11516.6	2324.57	145477	26520.1	2863.32	7.33
2017	10	1	1220.24	170.39	5706.67	1035.68	169.92	0.88
2017	10	2	572.98	56.07	3010.06	558.94	37.14	0
2017	10	3	435.53	47.25	2112.77	398.64	37.64	0.25
2017	10	4	1061.97	160.51	5583.17	1012.64	164.94	0.74
2017	10	5	256.01	32.2	1690.53	322.68	28.28	0.13
2017	10	6	144.77	14.4	994.49	192.24	13.51	0
2017	10	7	577.12	7.8	127.36	24.9	0.6	0
2017	10	8	365.73	7.32	394.74	74.71	0.95	0
2017	10	9	134.45	10.22	492.44	95.28	6.05	0
2017	10	10	651.77	24.57	994.6	193.13	19.57	0
2017	10	11	620	27.12	741.32	127.57	17.67	0
2017	10	12	1845.83	71.59	2881.47	420.39	89.94	0.44
2017	10	13	1069.55	49.81	1973.26	379.5	52.92	0
2017	10	14	1282.63	38.39	2103.49	290.06	60.16	0
2017	10	15	754.67	8.44	173.97	34.67	0.07	0
2017	10	16	295.49	6.76	217.08	42.27	2.97	0
2017	10	17	272.24	3.41	168.88	34.33	0.1	0	11561	736.25	29366.3	5237.63	702.43	2.44
2017	11	1	1949.66	82.11	2388.94	430.46	52.69	0.19
2017	11	2	1305.64	28.91	1244.44	229.31	11.72	0
2017	11	3	841.48	23.35	877.8	165.11	10.8	0.05
2017	11	4	1761.48	77.29	2338.31	421.04	51.07	0.16
2017	11	5	737.87	15.86	700.89	133.54	7.9	0.03
2017	11	6	345.05	7.06	409.65	79.06	3.68	0
2017	11	7	767.42	4.01	51.96	10.11	0.21	0
2017	11	8	456.9	3.68	159.49	30.08	0.31	0
2017	11	9	325.8	5.4	206.35	39.85	1.67	0
2017	11	10	1178.65	11.45	413.36	79.88	6.38	0
2017	11	11	1122.41	14.64	322.09	54.77	5.97	0
2017	11	12	4197.71	37.45	1279.05	184.99	32.91	0.15
2017	11	13	1715.97	23.43	818.8	156.92	16.48	0
2017	11	14	2979.83	19.98	941.43	129.16	22.47	0
2017	11	15	921.24	4.48	70.94	14.08	0.02	0
2017	11	16	400.67	3.41	87.56	16.9	1.07	0
2017	11	17	333	1.73	67.56	13.69	0.03	0	21340.8	364.24	12378.6	2188.95	225.38	0.58
2017	12	1	3202.1	189.8	5928.37	1072.09	115.32	0.22
2017	12	2	1793.21	62.54	3089.46	574.45	23.35	0
2017	12	3	1561.09	51.65	2199.6	416.79	20.01	0.06
2017	12	4	2964.5	179.42	5797.35	1047.91	112.08	0.17
2017	12	5	1368.9	35.83	1752.25	335.82	14.42	0.03
2017	12	6	683.39	16.15	1028.58	199.32	6.68	0
2017	12	7	843.72	8.67	132.63	25.83	0.42	0
2017	12	8	595.31	7.82	409.86	77.69	0.64	0
2017	12	9	591.75	12.66	510.98	99.08	2.93	0
2017	12	10	1357.07	25.38	1036.26	200.73	13.03	0
2017	12	11	1481.9	32.31	776.24	132.81	13.31	0
2017	12	12	5867.9	78.63	2862.14	417.45	62.44	0.17
2017	12	13	2283.46	51.62	2042.35	393.72	31.56	0
2017	12	14	4629.2	40.58	2044.25	281	41.41	0
2017	12	15	1099.87	9.48	184.54	36.6	0.05	0
2017	12	16	583.31	7.43	225.72	43.74	2.26	0
2017	12	17	432.2	3.58	176.04	35.55	0.06	0	31338.9	813.55	30196.6	5390.58	459.97	0.65
2018	1	1	3384.06	78.82	2992.33	544.52	54.13	0.18
2018	1	2	2127.28	26.86	1563.3	290.27	12.26	0
2018	1	3	1681.85	21.63	1099.72	208.2	10.82	0.05
2018	1	4	3139.32	74.03	2927.21	532.18	52.45	0.15
2018	1	5	1418.34	14.65	877.3	168.02	7.84	0.02
2018	1	6	706.14	6.55	516.37	100.04	3.67	0
2018	1	7	858.15	3.9	67.3	13.14	0.23	0
2018	1	8	636.07	3.38	205.67	38.9	0.34	0
2018	1	9	620.54	4.83	254.03	49.33	1.62	0
2018	1	10	1500.2	10.85	508.28	98.62	6.61	0
2018	1	11	1564.65	13.66	387.61	66.53	5.98	0
2018	1	12	6162.1	32.95	1351.16	198.27	27.26	0.09
2018	1	13	2883.95	22.77	999.99	192.53	16.28	0
2018	1	14	4435.2	16.67	941.4	129.73	17.56	0
2018	1	15	1095.45	4.34	92.61	18.36	0.03	0
2018	1	16	563.85	3.3	112.23	21.7	1.24	0
2018	1	17	443.93	1.63	87.33	17.69	0.03	0	33221.1	340.82	14983.8	2688.03	218.35	0.49
2018	2	1	4458.8	13.67	326.38	55.77	9.19	0.05
2018	2	2	3160.57	4.75	170.52	30.02	2.13	0
2018	2	3	1431.63	3.17	108.9	19.95	1.89	0.01
2018	2	4	4149.5	12.76	319.72	54.58	8.89	0.04
2018	2	5	1647.44	1.78	85.33	16.05	1.4	0.01
2018	2	6	863.78	0.71	49.73	9.54	0.65	0
2018	2	7	667.99	0.76	6.83	1.33	0.05	0
2018	2	8	498.22	0.52	17.38	3.16	0.06	0
2018	2	9	783.69	0.49	24.77	4.79	0.33	0
2018	2	10	1269.25	1.87	69.22	13.17	1.48	0
2018	2	11	1185.87	3.11	51.98	8.22	1.25	0
2018	2	12	5000.9	10.61	420.14	57.75	11.68	0.06
2018	2	13	2091.5	3.55	133.12	25.49	3.25	0
2018	2	14	3645.8	6.73	366.81	49.79	8.89	0
2018	2	15	812.95	0.84	8.3	1.63	0.01	0
2018	2	16	433.67	0.43	9.14	1.75	0.1	0
2018	2	17	346.47	0.27	7.02	1.43	0.01	0	32448	66.02	2175.29	354.42	51.26	0.17
2018	3	1	6112.3	53.45	1604.9	290.36	31.65	0.1
2018	3	2	4225.14	18.7	836.97	153.98	7.03	0
2018	3	3	1809.09	14.64	579.42	109.43	6.38	0.03
2018	3	4	5706.21	49.99	1563.96	282.1	30.62	0.09
2018	3	5	2126.75	9.47	455.61	87.21	4.61	0.01
2018	3	6	1124.25	4.13	266.52	52.07	2.12	0
2018	3	7	681.87	2.93	41.47	8.77	0.16	0
2018	3	8	650.63	2.56	112.01	21.22	0.2	0
2018	3	9	995.55	3.05	130.6	25.16	0.98	0
2018	3	10	1861.33	7.68	293.15	56.46	4.24	0
2018	3	11	1030.2	10.43	224.92	39.61	3.77	0
2018	3	12	4496.08	25.42	890.59	129.79	19.39	0.07
2018	3	13	2460.63	15.85	610.9	119.73	10.79	0
2018	3	14	3397.83	13.04	652.99	89.21	12.95	0
2018	3	15	776.25	3.19	60.98	12.71	0.02	0
2018	3	16	554.01	2.27	64.34	12.73	0.65	0
2018	3	17	392.59	1.22	48.03	10.22	0.02	0	38400.7	238.02	8437.36	1500.76	135.58	0.3
2018	4	1	3479.31	57.6	1735.08	324.77	38.81	0.15
2018	4	2	2459.57	19.67	888.57	166.35	8.59	0
2018	4	3	1041.12	14.89	642.05	125.67	8.35	0.04
2018	4	4	3216.65	54.36	1684.8	312.48	37.54	0.12
2018	4	5	1186.84	9.27	505.56	100.16	6.13	0.02
2018	4	6	645.82	3.86	300.22	61.54	2.91	0
2018	4	7	438.45	2.59	51.3	12.84	0.23	0
2018	4	8	362.01	2.29	125.87	24.82	0.28	0
2018	4	9	579.94	2.71	142.63	27.82	1.33	0
2018	4	10	911.55	6.77	288.8	57.26	4.95	0
2018	4	11	811.76	12.74	272.1	54.2	5.23	0
2018	4	12	2765.58	26.97	855.06	132.64	22.11	0.11
2018	4	13	1440.25	16.12	667.05	138.81	14.2	0
2018	4	14	1958.13	12.33	567.95	77.2	13.97	0
2018	4	15	569.97	2.66	92.39	21.16	0.04	0
2018	4	16	296.69	2.18	80.15	17.12	0.95	0
2018	4	17	235.89	0.98	61.69	15.02	0.03	0	22399.5	247.99	8961.27	1669.86	165.65	0.44
2018	5	1	894.09	0.53	3.48	1.04	2.01	0.13
2018	5	2	643.09	0.12	0.93	0.28	0.41	0
2018	5	3	364.53	0.15	1.4	0.43	0.99	0.04
2018	5	4	811.15	0.44	2.77	0.8	1.91	0.13
2018	5	5	277.06	0.08	0.85	0.29	0.8	0.02
2018	5	6	135.34	0.04	0.7	0.24	0.38	0
2018	5	7	226.57	0.08	0.72	0.25	0.05	0
2018	5	8	165.84	0.04	0.52	0.15	0.04	0
2018	5	9	142.09	0.02	0.14	0.05	0.28	0
2018	5	10	436.49	0.09	0.74	0.21	0.62	0
2018	5	11	333.93	0.15	1.71	0.52	0.35	0
2018	5	12	1175.61	0.26	4.44	0.86	0.84	0.02
2018	5	13	562.86	0.31	2.99	0.95	1.14	0
2018	5	14	776.87	0.08	2.8	0.36	0.39	0
2018	5	15	273.39	0.09	1.63	0.44	0.01	0
2018	5	16	128.95	0.04	0.7	0.2	0.05	0
2018	5	17	115.62	0.03	0.63	0.23	0.01	0	7463.48	2.55	27.15	7.3	10.28	0.34
2018	6	1	410.11	10.64	112.62	36.78	11.87	0.55
2018	6	2	184.93	2.3	32.07	10.36	1.95	0
2018	6	3	141.69	2.68	43.38	14.44	3.69	0.17
2018	6	4	359.43	9.29	87.78	27.29	11.13	0.5
2018	6	5	85.08	1.46	25.68	9.27	2.68	0.1
2018	6	6	40.6	0.54	19.61	7.68	1.46	0
2018	6	7	121.36	1.15	25.37	9.75	0.41	0
2018	6	8	84.48	0.61	17.86	5.66	0.22	0
2018	6	9	32.03	0.3	4.52	1.65	0.52	0
2018	6	10	125.94	1.75	17.74	6.37	2.25	0
2018	6	11	170.2	2.94	47.4	16.49	3.71	0
2018	6	12	441.75	3.84	50.7	16.59	4.89	0.1
2018	6	13	242.41	5.36	87.45	32.29	9.89	0
2018	6	14	285.91	0.51	4.31	0.61	0.58	0
2018	6	15	159.67	1.15	54.9	16.28	0.08	0
2018	6	16	65.17	0.8	23.02	7.26	0.81	0
2018	6	17	54.61	0.4	20.78	8.29	0.06	0	3005.37	45.72	675.19	227.06	56.2	1.42
2018	7	1	22.53	118.97	3216.87	582.67	95.25	0.79
2018	7	2	49.92	39.26	1671.85	304.08	18.46	0
2018	7	3	8.81	32.13	1193.81	223.92	16.15	0.24
2018	7	4	20.21	108.53	3133.64	565.07	92.69	0.7
2018	7	5	5.99	20.15	931.66	176.48	11.94	0.13
2018	7	6	6.18	8.73	538.5	103.94	5.65	0
2018	7	7	26.46	9.7	85.25	18.18	0.69	0
2018	7	8	18.31	7.13	237.2	44.38	0.57	0
2018	7	9	2.53	6.9	265.62	50.29	2.69	0
2018	7	10	37.13	15.95	522.51	100.62	10.2	0
2018	7	11	38.17	24.76	495.06	89.95	17.06	0
2018	7	12	122.16	45.23	1205.27	187.74	48.89	0.26
2018	7	13	41.17	39.1	1144.15	226.8	29.19	0
2018	7	14	83.26	17.68	693.59	96.2	25.82	0
2018	7	15	34.83	10.32	120.28	25.59	0.06	0
2018	7	16	16.23	6.19	139.47	27.79	2.07	0
2018	7	17	14.05	3.83	107.21	23.2	0.06	0	547.94	514.56	15701.9	2846.9	377.44	2.12
2018	8	1	233.1	34.82	653.76	114.88	44.22	1.18
2018	8	2	70.12	11.02	340.82	61.22	10.28	0
2018	8	3	71.87	8.53	236.02	43.11	10.92	0.36
2018	8	4	165.7	32.1	635.39	111.29	42.9	1.04
2018	8	5	36.94	4.44	175.36	32.64	8.3	0.2
2018	8	6	25.78	1.71	101.18	19.31	4.16	0
2018	8	7	103.96	2.35	19.73	3.97	0.27	0
2018	8	8	45.16	1.77	52.17	9.63	0.33	0
2018	8	9	14.74	1.03	45.3	8.45	2.04	0
2018	8	10	63.59	5.15	122.47	22.76	7.46	0
2018	8	11	55.08	8.61	139.35	24.38	6.62	0
2018	8	12	47.27	18.27	397.61	59.29	28.93	0.86
2018	8	13	216.46	11	269.98	51.08	21.24	0
2018	8	14	20.35	8.63	261.55	35.72	19.09	0
2018	8	15	131.74	2.65	30.18	6.09	0.03	0
2018	8	16	43.27	1.43	32.88	6.35	0.72	0
2018	8	17	54.03	0.96	25.42	5.34	0.04	0	1399.16	154.47	3539.17	615.51	207.55	3.64
2018	9	1	0	65.55	2560.91	482.3	120.69	2.26
2018	9	2	0	19.38	1349.67	260.36	26.85	0
2018	9	3	0	17.36	1008.13	192.94	31.18	0.69
2018	9	4	0	61.6	2489.9	469.03	117.2	2.04
2018	9	5	0	11.31	794.62	153.04	23.85	0.39
2018	9	6	0	4.9	466.26	90.64	11.51	0
2018	9	7	6.02	2.91	74.79	14.44	0.64	0
2018	9	8	3.31	3.07	217.03	41.86	0.88	0
2018	9	9	0	3.04	231.07	44.65	5.67	0
2018	9	10	0	12.34	496.2	95.41	17.09	0
2018	9	11	6.02	8.11	386.25	69.49	12.41	0
2018	9	12	11.8	18.36	754.14	119.3	37.41	0.49
2018	9	13	3.88	21.76	1077.34	203.61	55.46	0
2018	9	14	7.03	8.73	363.65	49.94	20.13	0
2018	9	15	11.53	2.8	118.18	23.06	0.07	0
2018	9	16	3.29	2.78	138.04	26.81	2.15	0
2018	9	17	5.87	1.42	105.74	21.23	0.11	0	58.75	265.42	12631.9	2358.11	483.3	5.87
2018	10	1	0	8.71	119.54	20.64	9.06	0.37
2018	10	2	0	2.41	61.37	11.31	1.93	0
2018	10	3	0	2.3	45.27	8.16	2.72	0.12
2018	10	4	0	7.66	115.23	19.84	8.74	0.34
2018	10	5	0	1.34	34.3	6.3	2.12	0.07
2018	10	6	0	0.58	20	3.79	1.05	0
2018	10	7	1.89	0.95	4.58	0.91	0.1	0
2018	10	8	0	0.57	10.26	1.9	0.1	0
2018	10	9	0	0.36	9.02	1.66	0.57	0
2018	10	10	0	1.46	19.78	3.58	1.54	0
2018	10	11	3	1.66	25.06	4.37	1.26	0
2018	10	12	4.04	2.87	43.14	6.47	3.87	0.15
2018	10	13	0	3.36	45.17	8.29	3.56	0
2018	10	14	3	1.01	18.56	2.27	2.15	0
2018	10	15	3.65	1.13	7.49	1.47	0.02	0
2018	10	16	0	0.5	7	1.3	0.19	0
2018	10	17	2.22	0.38	5.49	1.13	0.02	0	17.8	37.25	591.26	103.39	39	1.05
2018	11	1	0	12.05	188.88	33.01	9.4	0.22
2018	11	2	0	3.93	97.56	17.63	2.11	0
2018	11	3	0	3.08	66	12.23	2.26	0.07
2018	11	4	0	10.93	183.12	31.87	9.09	0.2
2018	11	5	0	1.69	48.22	9.15	1.67	0.03
2018	11	6	0	0.67	26.59	5.23	0.75	0
2018	11	7	0.46	1.01	5.95	1.25	0.07	0
2018	11	8	0.2	0.78	14.94	2.82	0.08	0
2018	11	9	0	0.44	12.2	2.33	0.4	0
2018	11	10	0.18	2.01	31.7	6.01	1.35	0
2018	11	11	0.21	2.51	38.95	6.76	1.34	0
2018	11	12	0.31	4.59	71.87	10.96	3.86	0.07
2018	11	13	0.67	4.12	71.53	13.59	3.85	0
2018	11	14	1.49	1.85	32.86	4.31	2.02	0
2018	11	15	1.7	1.12	8.19	1.74	0.01	0
2018	11	16	0.19	0.63	9.06	1.81	0.15	0
2018	11	17	0.86	0.43	6.45	1.43	0.01	0	6.27	51.84	914.07	162.13	38.42	0.59
2018	12	1	14.29	62.95	1280.19	229.84	36.14	0.26
2018	12	2	8.55	20.84	652.7	121.12	7.53	0
2018	12	3	3.94	17.14	475.76	88.98	8.66	0.08
2018	12	4	12.96	57.52	1243.92	223.03	35	0.24
2018	12	5	2.03	10.18	364.22	69.24	6.46	0.04
2018	12	6	1.7	4.29	209.6	40.78	3.01	0
2018	12	7	16.13	4.84	37.01	7.32	0.19	0
2018	12	8	10.05	3.91	99.52	18.84	0.25	0
2018	12	9	1.43	2.88	99.82	19.1	1.43	0
2018	12	10	6.59	9.3	206.66	39.38	4.45	0
2018	12	11	17.47	12.16	225	39.26	4.53	0
2018	12	12	6.64	20.43	399.85	62.57	10.85	0.05
2018	12	13	28.24	20.38	462.38	88.04	12.59	0
2018	12	14	5.49	7.27	170.41	23.16	4.85	0
2018	12	15	25.57	5.27	52.39	10.46	0.02	0
2018	12	16	8.5	3.24	60.56	11.69	0.66	0
2018	12	17	7.99	2.11	45.92	9.47	0.03	0	177.57	264.71	6085.91	1102.28	136.65	0.67
2019	1	1	675.37	69.55	1527.81	264.91	49.26	0.37
2019	1	2	220.95	22.59	792.84	143.24	10.81	0
2019	1	3	232.64	17.73	534.68	97.72	11.15	0.11
2019	1	4	554.01	64.83	1485.85	257.33	47.77	0.32
2019	1	5	120.19	10.55	403.82	75.26	8.38	0.05
2019	1	6	78.51	4.63	232.21	44.24	4.12	0
2019	1	7	398.82	3.96	43.19	8.23	0.22	0
2019	1	8	175.4	3.04	108.57	20.22	0.31	0
2019	1	9	77.51	2.71	110.88	21.03	1.85	0
2019	1	10	274.74	10	284.34	53.55	6.64	0
2019	1	11	437.62	14.61	249.7	40.8	5.23	0
2019	1	12	405.22	32.98	814.57	115.55	26.06	0.13
2019	1	13	631.71	20.44	579.17	108.86	17.53	0
2019	1	14	5.42	16.07	556.73	74.58	17.55	0
2019	1	15	529.33	4.34	50.4	9.81	0.02	0
2019	1	16	160.85	2.53	61.45	11.74	0.65	0
2019	1	17	163.08	1.44	45.23	9.08	0.03	0	5141.37	302	7881.44	1356.15	207.58	0.98
2019	2	1	977.03	29.8	835.82	147.22	24	0.14
2019	2	2	504.17	9.43	436.84	79.2	5.36	0
2019	2	3	333.78	7.93	302.1	55.93	5.38	0.04
2019	2	4	841.32	27.74	817.71	143.95	23.27	0.12
2019	2	5	217.77	5.1	237.9	44.74	4.04	0.02
2019	2	6	114.92	2.32	139.61	26.69	1.96	0
2019	2	7	470.29	1.7	18.63	3.62	0.1	0
2019	2	8	273.03	1.29	57.17	10.65	0.14	0
2019	2	9	133.69	1.43	66.35	12.71	0.87	0
2019	2	10	481.56	3.83	131.27	25.05	2.79	0
2019	2	11	655.67	5.72	126.43	21.31	2.69	0
2019	2	12	1118.61	14.17	408	58.67	12.8	0.06
2019	2	13	960.58	8.59	272.65	51.59	7.1	0
2019	2	14	411.69	7.38	275.32	36.95	8.48	0
2019	2	15	596.37	1.95	25.65	5.08	0.01	0
2019	2	16	234.17	1.11	31.16	6.04	0.29	0
2019	2	17	190.62	0.69	24.52	4.98	0.02	0	8515.27	130.18	4207.13	734.38	99.3	0.38
2019	3	1	2212.39	140.44	4048.49	720.89	94.95	0.32
2019	3	2	1364.93	42.95	2107.08	385.85	19.55	0
2019	3	3	852.4	38.72	1473.12	276	18.58	0.09
2019	3	4	2000.75	130.35	3956.22	703.33	92.25	0.26
2019	3	5	724.54	25.84	1165.18	221.45	13.77	0.04
2019	3	6	324.74	12.13	682.13	131.83	6.52	0
2019	3	7	650.6	8.69	93.79	18.8	0.35	0
2019	3	8	498.22	6.7	272.81	51.25	0.5	0
2019	3	9	338.53	8.05	334.05	64.34	2.87	0
2019	3	10	1284.24	19.66	698.61	134.41	10.5	0
2019	3	11	1022.38	26.84	588.53	99.95	12.56	0
2019	3	12	3467.26	63.67	2180.2	316.03	55.1	0.17
2019	3	13	1683.82	43.05	1459.62	281.24	28.15	0
2019	3	14	2551	31.8	1561.72	213.67	35.97	0
2019	3	15	787.33	10.18	125.75	25.4	0.04	0
2019	3	16	423.01	5.96	151.98	29.7	1.4	0
2019	3	17	320.02	3.55	116.65	24.02	0.05	0	20506.2	618.58	21015.9	3698.16	393.11	0.88
2019	4	1	1893.23	16.05	314.92	58.66	14.29	0.14
2019	4	2	1312.91	5.5	165.03	31.07	3.13	0
2019	4	3	748.5	4.01	115.29	22.35	3.48	0.04
2019	4	4	1713.66	14.88	306.19	56.68	13.84	0.12
2019	4	5	661.74	2.23	89.56	17.62	2.64	0.02
2019	4	6	311.52	0.85	52.84	10.71	1.22	0
2019	4	7	612.1	1.02	9.07	2.1	0.09	0
2019	4	8	387.87	0.79	23.47	4.57	0.1	0
2019	4	9	263.24	0.52	24.63	4.84	0.64	0
2019	4	10	978.81	1.63	51.75	10.26	1.89	0
2019	4	11	839.6	3.75	49.52	9.61	1.65	0
2019	4	12	2528.05	6.32	109.83	17.82	4.94	0.04
2019	4	13	1365.36	4.42	114.98	23.75	5.35	0
2019	4	14	1529.37	2.25	59.27	8.17	2.64	0
2019	4	15	705.61	1.11	12.57	2.85	0.01	0
2019	4	16	391.34	0.6	13.96	2.91	0.21	0
2019	4	17	262.97	0.4	11.68	2.68	0.01	0	16505.9	66.33	1524.56	286.65	56.13	0.36
2019	5	1	707.54	41.92	764.95	148.87	31.97	0.36
2019	5	2	407.73	13.12	384.63	73.55	6.72	0
2019	5	3	267.64	10.46	269.21	55.59	7.96	0.11
2019	5	4	636.92	38.45	732.58	139.32	30.88	0.32
2019	5	5	223.97	5.78	200.03	42.15	6.01	0.06
2019	5	6	130.02	2.39	119.76	27.09	2.98	0
2019	5	7	262.35	3	33.29	9.98	0.25	0
2019	5	8	147.38	2.06	59.15	12.66	0.23	0
2019	5	9	95.75	1.25	49.94	10.15	1.33	0
2019	5	10	374.14	4.76	118.99	25.23	3.79	0
2019	5	11	265.84	10.62	163	37.52	5	0
2019	5	12	770.68	17.39	299.33	55.25	12.89	0.12
2019	5	13	504.98	14.62	322.59	75.71	14.19	0
2019	5	14	550.16	5.76	134.85	18.06	6.23	0
2019	5	15	305.76	3.26	48.37	13.38	0.04	0
2019	5	16	150.63	1.76	40.74	10	0.6	0
2019	5	17	114.58	1.16	38.01	11.08	0.04	0	5916.07	177.76	3779.42	765.59	131.11	0.97
2019	6	1	923.89	165.21	6047.61	1324.05	180.61	1.03
2019	6	2	1120.11	46.76	2880.9	593.2	33.28	0
2019	6	3	253.37	43.36	2338.26	527.24	31.39	0.29
2019	6	4	1267.99	150.9	5726.59	1219.24	174.85	0.87
2019	6	5	108.3	27.59	1799.31	408.14	23.23	0.16
2019	6	6	34.67	12.84	1114.35	269.45	11.87	0
2019	6	7	131.5	12.83	323.82	106.59	2.33	0
2019	6	8	98.82	8.69	508.54	116.5	1.17	0
2019	6	9	30.51	8.4	467.32	98.33	4.53	0
2019	6	10	124.72	23.65	1022.51	234.06	20.14	0
2019	6	11	1107.72	39.14	1224.74	327.79	43.45	0
2019	6	12	1455.88	65.42	2136.39	452.18	93.73	0.56
2019	6	13	202.71	70.54	3515.25	917.28	86.71	0
2019	6	14	557.37	19.79	874.7	121.7	37.69	0
2019	6	15	234.93	12.78	474.43	138.64	0.17	0
2019	6	16	69.62	8.89	382.42	100.68	5.48	0
2019	6	17	54.02	4.82	362.51	114.23	0.19	0	7776.13	721.61	31199.6	7069.3	750.82	2.91
2019	7	1	82.29	23.11	370.64	70.79	25.55	0.57
2019	7	2	56.21	7.19	194.05	36.59	5.7	0
2019	7	3	28.07	5.8	131.08	26.26	6.47	0.18
2019	7	4	69.19	20.7	358.12	67.35	24.73	0.52
2019	7	5	15.91	3.14	96.73	19.77	4.93	0.1
2019	7	6	10.32	1.3	57.47	12.44	2.42	0
2019	7	7	66.71	2.18	13.22	3.67	0.18	0
2019	7	8	38.22	1.43	30.76	6.23	0.2	0
2019	7	9	10.27	0.73	24.1	4.82	1.16	0
2019	7	10	55.6	3.04	50.29	10.48	3.21	0
2019	7	11	35.95	5.64	80.26	17.77	3.77	0
2019	7	12	79.54	8.99	133.26	24.8	8.46	0.13
2019	7	13	75.99	9.07	135.69	31.63	9.95	0
2019	7	14	57.66	2.84	51.32	6.97	3.62	0
2019	7	15	82.65	2.53	23.02	5.85	0.03	0
2019	7	16	31.04	1.19	19	4.39	0.45	0
2019	7	17	33.37	0.91	17.87	4.88	0.03	0	828.99	99.79	1786.88	354.69	100.86	1.5
2019	8	1	329.8	13.11	187.23	33.08	14	0.49
2019	8	2	85.75	4.15	101.81	18.61	3.24	0
2019	8	3	96.51	3.28	65.21	11.99	3.72	0.16
2019	8	4	229.56	11.8	182.27	32.08	13.55	0.45
2019	8	5	48.56	1.72	48.69	9.14	2.84	0.1
2019	8	6	30.44	0.69	28.31	5.46	1.49	0
2019	8	7	142.24	1.18	5.44	1.13	0.11	0
2019	8	8	64.52	0.83	14.95	2.78	0.12	0
2019	8	9	18.69	0.37	12.76	2.45	0.63	0
2019	8	10	94.32	1.57	28.55	5.47	2.11	0
2019	8	11	52.12	2.89	32.47	5.75	1.69	0
2019	8	12	63.39	4.87	60.77	9.48	4.54	0.13
2019	8	13	289.33	3.72	58.3	11.67	5.04	0
2019	8	14	16.3	1.78	28.35	3.82	2.33	0
2019	8	15	158.73	1.45	8.19	1.71	0.02	0
2019	8	16	57.39	0.61	8.66	1.69	0.23	0
2019	8	17	65.19	0.52	7.03	1.5	0.02	0	1842.84	54.54	878.99	157.81	55.68	1.33
2019	9	1	335.06	189.26	7793.37	1463.42	262.42	2.96
2019	9	2	266.91	56.59	4141.3	798.82	58.63	0
2019	9	3	171.01	50.43	2991.97	573.98	65.02	0.9
2019	9	4	413.92	177.22	7606.4	1428.52	254.95	2.64
2019	9	5	116.73	33.02	2363.96	456.91	49.91	0.52
2019	9	6	65.95	14.61	1389.67	271.59	24.06	0
2019	9	7	49.52	9.23	194.66	38.01	1.13	0
2019	9	8	79.63	9.4	628.44	121.42	1.74	0
2019	9	9	49.12	8.88	683.46	133.06	11.38	0
2019	9	10	223.13	33.56	1412.73	273.99	34.5	0
2019	9	11	15.14	22.1	925.73	167.5	23.66	0
2019	9	12	162.52	47.55	2080.16	325.38	72.02	0.77
2019	9	13	189.5	60.96	2804.94	538.51	95.68	0
2019	9	14	182.53	21.9	1129.84	156.25	39.2	0
2019	9	15	49.64	9.31	304.12	60.4	0.14	0
2019	9	16	68.08	8.64	360.84	70.37	5.24	0
2019	9	17	43.33	4.6	294.92	59.69	0.19	0	2481.72	757.26	37106.5	6937.82	999.87	7.79
2019	10	1	354.73	254.39	11002.9	2054.43	253.7	1.33
2019	10	2	107.76	80.77	5742.85	1094.16	61.24	0
2019	10	3	114.46	65.3	4163.67	801.22	42.11	0.39
2019	10	4	257.44	236.5	10704.5	1997.5	247.33	1.15
2019	10	5	56.19	42.7	3281.96	636.63	30.79	0.2
2019	10	6	28.32	19.22	1921.55	376.8	14.15	0
2019	10	7	196.21	15.38	303.6	59.56	1.32	0
2019	10	8	85.69	13.59	847.58	163.01	1.84	0
2019	10	9	37.02	13.97	953.78	185.77	6.92	0
2019	10	10	133.57	45.76	2344.97	456.63	32.27	0
2019	10	11	108.78	37.61	1400.18	248.18	30.47	0
2019	10	12	115.77	103.91	5068.08	748.78	159.42	0.98
2019	10	13	284.1	83.56	4666.73	909.28	90.14	0
2019	10	14	1.93	57.56	3624.35	498.72	109.95	0
2019	10	15	257.88	15.16	386.3	77	0.1	0
2019	10	16	81.33	12.24	489.75	95.95	5.04	0
2019	10	17	84	6.59	363.62	73.97	0.12	0	2305.18	1104.21	57266.4	10477.6	1086.91	4.05
2019	11	1	470.97	73.14	2410.97	431.67	73.98	0.46
2019	11	2	211.92	22.56	1254.55	231.64	16.33	0
2019	11	3	170.08	19.31	899.54	168.1	16.96	0.13
2019	11	4	378.72	68.72	2357.2	421.81	71.8	0.39
2019	11	5	91.87	12.64	714.81	135	12.81	0.07
[truncated: 30 more rows]
[truncated: 20 more columns]

## Sheet: S4
2010	1	1	8201.9	0.13	1.23	0.18	0.83	0.02										Gizdepka loads [kg/month]											Błądzikowski loads [kg/month]											Płutnica loads [kg/month]
2010	1	2	4047.75	0.02	0.39	0.06	0.16	0										Year	month	no. of stream	NO3	Pmin	Norg	Porg	NH4	NO2			year	month	no. of stream	NO3	Pmin	Norg	Porg	NH4	NO2			year	month	no. of stream	NO3	Pmin	Norg	Porg	NH4	NO2
																	Precipitation				kg / month						runoff					kg / month											kg / month
2010	1	15	858.68	0	0	0	0	0									50.17	2011	1	13	3191.41	61.24	3548.58	645.71	49.69	0	1491186		2011	1	10	3622.88	27.28	1772.45	323.15	19.52	0			2011	1	1	7286.3	225.76	9998.97	1724.36	181.62	0.2
2010	1	16	959.03	0	0.01	0	0.02	0									82.44		2	13	11351.3	75.69	4590.33	846.23	49.62	0	2210803			2	10	12861.2	32.45	2285.18	418.36	19.35	0				2	1	28540.6	261.73	12238.5	2128.73	208.96	0.22
2010	1	17	630.91	0	0	0	0	0	14698.3	0.15	1.63	0.24	1.01	0.02			28.58		3	13	5230.1	19.96	1018.31	183.31	19.52	0	1075049			3	10	5803.7	8.86	515.19	93.11	7.4	0				3	1	11860.5	77.39	3017.94	517.31	60.38	0.17
2010	2	1	3918.33	87.26	3310.65	566.6	76.71	0.24									25.48		4	13	3021.11	3.6	129.93	23.42	4.79	0	513242			4	10	3365.36	1.56	67.02	12.1	2.04	0				4	1	7737.3	18.89	443.87	74.15	16.84	0.13
2010	2	2	2045.77	26.83	1723.37	303.85	16.57	0									48.47		5	13	1322.13	4.5	68.53	16.82	5.38	0	222080			5	10	1472.32	1.38	26.14	5.52	1.77	0				5	1	3141.33	13.17	188.14	35.73	13.68	0.32
2010	2	3	1636.58	23.64	1238.44	220.63	17.24	0.07									45.57		6	13	478.76	5.71	83.45	28.64	10.49	0	86117			6	10	508.01	1.75	18.36	6.06	2.23	0				6	1	1596.56	12.15	130.21	37.07	14.3	0.64
2010	2	4	3623.02	82.35	3240.57	554.55	74.4	0.21									172.08		7	13	205.26	94.66	4146.66	937.49	114	0	992428			7	10	140.79	31.97	1438.47	284.22	31.13	0				7	1	306.99	246.08	8521.1	1626.22	282.66	1.95
2010	2	5	1048.69	15.91	996.21	179.47	12.88	0.03									135.81		8	13	691.56	46.11	1810.74	319.61	69.53	0	623227			8	10	510.63	22.96	904.96	158.88	25.73	0				8	1	845.48	161.2	5327.72	894.04	202.11	2.44
2010	2	6	527.77	7.21	593.86	108.29	6.11	0									55.86		9	13	613.84	20.17	1982.85	357.78	70.88	0	320695			9	10	499.45	11.6	1039.4	189.97	26.83	0				9	1	877.04	103.17	5738.99	1004.18	195.71	2.19
2010	2	7	672.85	3.72	72.11	13.3	0.28	0									26.18		10	13	2831.41	0.67	78.61	13.9	3.98	0	106314			10	10	3169.56	0.27	40.29	7.29	1.52	0				10	1	7649.3	5.26	170.23	27.38	14.54	0.34
2010	2	8	711.64	3.3	227.7	40.79	0.45	0									23.08		11	13	288.94	5.97	267.68	46.13	9.87	0	109660			11	10	220.99	3.21	135.59	23.84	3.74	0				11	1	395.35	23.7	832.72	139.39	28.25	0.36
2010	2	9	434.57	4.54	283.8	51.94	2.73	0									63.96		12	13	1482.91	13.7	510.8	89.19	15.43	0	365878			12	10	1916.74	6.24	257.19	45.91	5.47	0				12	1	3550.94	56.69	1642.22	271.98	52	0.33
2010	2	10	1804.08	10.98	548.15	99.62	8.68	0									75.15	2012	1	13	5665.5	19.44	724.99	129.25	15.92	0	1104045		2012	1	10	6599.8	8.6	367.79	66.72	6.02	0			2012	1	1	13037.8	78.69	2308.04	387.25	56.97	0.28
2010	2	11	1091.01	15.42	440.38	72.91	7.44	0									66.16		2	13	5759.8	46.19	2844.02	520.45	37.26	0	1605519			2	10	6692.9	19.51	1378.55	251.23	13.99	0				2	1	13091.1	163.53	8030.93	1388.93	138.92	0.24
2010	2	12	1928.04	36.23	1523.51	218.33	32.21	0.07									27.48		3	13	5760.8	4.8	173.01	31.89	4.52	0	893212			3	10	6518.7	1.87	86.29	15.63	1.82	0				3	1	13984.9	21.78	557.61	95.62	15.08	0.06
2010	2	13	2098.88	24.45	1096.14	197.29	22.71	0									37.47		4	13	3158.6	8.04	241.68	44.51	7.83	0	553366			4	10	3454.39	3.12	113.07	20.35	2.86	0				4	1	7318.3	36.72	653.21	107.94	22.24	0.16
2010	2	14	636.06	17.49	1056.84	143.2	20.18	0									24.78		5	13	1545.87	2.82	39.66	10.57	3.01	0	216801			5	10	1715.58	0.9	14.66	3.36	1.18	0				5	1	3981.7	8.39	110.16	22.47	8.32	0.22
2010	2	15	772.85	4.73	101.79	19.18	0.03	0									90.64		6	13	558.07	27.95	646.32	182.68	32.87	0	175145			6	10	600.76	7.18	155.94	39.32	6.19	0				6	1	1612.92	59.66	1113.83	253.85	53.24	0.75
2010	2	16	560.11	3.03	126.13	23.24	1.16	0									156.99		7	13	239.76	124.85	5874.78	1465.42	169.52	0	1063867			7	10	179.47	37.87	1731.44	369.17	39.2	0				7	1	336.56	292.4	10384.4	2134.88	339.39	2.04
2010	2	17	373.2	1.59	100.6	19.28	0.05	0	23883.5	368.68	16680.2	2832.47	299.83	0.62			51.07		8	13	617.99	6.09	139.9	26.46	9.41	0	150190			8	10	292.15	2.96	66.95	11.89	3.84	0				8	1	788.43	20.8	373.25	62.76	24.93	0.58
2010	3	1	8060.1	133.51	4777.85	834.28	112.28	0.35									40.97		9	13	135.07	8.69	667.1	118.56	42.96	0	99161			9	10	83.74	4.75	348.36	63.15	15.45	0				9	1	185.3	45.91	1959.8	342.94	113.43	2.12
2010	3	2	3978.2	41.62	2462.01	439.96	21.41	0									54.96		10	13	4302.68	4.8	363.28	63.64	19.11	0	75444			10	10	4083.63	2.03	197.49	35.41	7.07	0				10	1	11950.3	24.72	889.2	148	56.61	1.09
2010	3	3	3068.3	32.18	1852.45	335.27	19.9	0.1									93.34		11	13	507.03	46.45	2498.93	449.24	42.28	0	738478			11	10	455.23	20.84	1234.14	222.01	15.44	0				11	1	692.94	167.75	7144.76	1217.37	149.95	0.63
2010	3	4	7255.1	126.94	4663.69	812.87	109.5	0.29									64.46		12	13	2905.62	52.19	3179.72	572.87	44.45	0	1125913			12	10	3054.23	24.37	1585.75	284.92	16.38	0				12	1	5980.6	187.29	8020.62	1376.67	144.91	0.21
2010	3	5	1875.42	20.16	1485.99	271.07	14.79	0.05									60.86	2013	1	13	5197.4	2.14	134.08	23.57	4.64	0	629968		2013	1	10	5873.5	1.54	75.14	13.03	1.91	0			2013	1	1	13162.4	9.16	181.13	28.17	7.91	0.1
2010	3	6	944.66	8.48	880.97	162.67	7.13	0									56.56		2	13	5853.9	54.04	2801.31	516.05	36.93	0	1528684			2	10	6360	23.52	1348.28	244.96	13.93	0				2	1	13202.2	177.17	7181.7	1242.47	119.96	0.22
2010	3	7	1052.51	5.33	117.44	22.52	0.43	0									43.97		3	13	6190.5	11.7	595.73	109.04	11.21	0	1006448			3	10	6996.1	5.27	295.62	53.8	4.25	0				3	1	15135.3	43.65	1830.87	314.48	38.5	0.09
2010	3	8	1356.13	4.84	351.45	63.43	0.6	0									48.57		4	13	4854.2	50.7	3080.31	636.94	54.81	0	1168292			4	10	5533.03	19.47	1306.51	248.51	18.39	0				4	1	11071.1	172.16	6923.41	1263.66	147.28	0.44
2010	3	9	782.93	5.86	430.48	78.84	3.08	0									75.05		5	13	4126.11	40.89	2466.43	638.4	70.67	0	897679			5	10	4452.87	10.17	756.53	165.09	17.01	0				5	1	8954.9	99.25	4325.29	913.69	130.31	0.64
2010	3	10	3500.9	13.63	832.56	152.36	12.21	0									53.36		6	13	1598.62	31.45	1941.53	617.85	66.21	0	374157			6	10	1732.49	9.14	371.34	112.66	10.17	0				6	1	4542.05	70.54	2446.89	659.42	79.84	0.79
2010	3	11	945.1	30.48	640.1	109.08	17.62	0									9.59		7	13	620.66	0.58	9.29	2.85	2.12	0	84619			7	10	654.92	0.24	2.47	0.59	0.89	0				7	1	1467.57	1.48	9.96	2.22	2.86	0.35
2010	3	12	1696.41	61.3	1978.62	288.42	60.47	0.2									52.26		8	13	491.48	4.56	62.21	12.13	5.59	0	69001			8	10	307.86	1.7	28.12	5	2.41	0				8	1	778.53	14.85	216.66	35.54	16.54	0.65
2010	3	13	3174.7	31.35	1718.86	317.34	33.35	0									94.24		9	13	333.14	41.28	2136.48	383.46	79.16	0	358542			9	10	460.75	21.73	1047.1	189.16	28.28	0				9	1	642.53	134.3	5581.79	986.65	192.64	1.85
2010	3	14	860.5	26.7	1307.37	176.46	36.75	0									47.47		10	13	57.04	15.65	947.25	168.42	26.63	0	184713			10	10	67.08	6.53	455.44	81.46	9.11	0				10	1	98.87	45.99	2140	372.2	51.57	0.52
2010	3	15	976.7	5.83	168	32.24	0.05	0									42.97		11	13	226.47	3.05	42.14	7.17	3.6	0	71572			11	10	121.05	1.29	18.22	3	1.69	0				11	1	286.8	10.87	137.29	20.97	11.84	0.29
2010	3	16	984.6	4.43	202.55	37.68	2.19	0									49.77		12	13	691.79	19.35	920.93	163.49	19.22	0	363064			12	10	264.29	8.74	443.45	78.71	7.35	0				12	1	631.01	64.94	2458.8	417.04	54.3	0.29
2010	3	17	655.45	1.99	160.67	31.34	0.06	0	41167.7	554.63	24031.1	4165.83	451.82	0.99			61.66	2014	1	13	2256.28	13.56	514.48	89.9	16.88	0	441882		2014	1	10	2234.81	6.25	255.82	45.32	6.42	0			2014	1	1	4814.14	54.31	1587.8	258.83	55.6	0.34
2010	4	1	5246.1	7.29	103.47	16.84	6.24	0.12									15.29		2	13	3416.64	12.41	623.81	110.53	16.38	0	531300			2	10	3464.59	6.17	298.42	53.07	5.78	0				2	1	7949.6	45.08	1688.95	283.61	51.07	0.29
2010	4	2	2713.08	2.37	56.09	9.5	1.39	0									53.86		3	13	2982.31	19.66	798.48	144.38	22.02	0	579485			3	10	3275	7.29	371.99	66.32	8.05	0				3	1	7182.8	81.01	2447.3	411.62	72.17	0.37
2010	4	3	2037.04	1.57	32.42	5.64	1.64	0.03									30.08		4	13	2753.35	6.07	183.42	34.14	7.42	0	374799			4	10	3262.06	2.34	84.86	15.31	2.68	0				4	1	7178.9	25.93	522.32	87.05	22.21	0.24
2010	4	4	5051.83	6.92	100.25	16.18	6.03	0.1									46.67		5	13	1406.37	14.62	449.45	103.6	20.87	0	233649			5	10	1546.11	4.53	147.75	30.04	5.52	0				5	1	3186.01	36.69	815.85	161.21	38.04	0.52
2010	4	5	1209.62	0.66	23.58	4.22	1.26	0.02									61.36		6	13	643.35	38.02	1870.78	476.24	51.57	0	305040			6	10	491.97	10.83	466.39	103.27	10.94	0				6	1	1425.71	79.24	2964.46	624.78	83.67	0.84
2010	4	6	581.63	0.19	13.2	2.47	0.61	0									21.89		7	13	147.4	3.81	34.87	9.89	5.15	0	33450			7	10	162.46	1.05	8.23	2.09	1.46	0				7	1	339.68	7.52	59.91	13.45	7.86	0.47
2010	4	7	697.75	0.29	3.36	0.72	0.05	0									77.25		8	13	116.35	20.08	662.42	120.45	23.32	0	267167			8	10	69.54	8.49	313.05	55.29	8.26	0				8	1	173.57	65.37	1971.98	333.71	60.68	0.65
2010	4	8	857.53	0.2	6.47	1.17	0.05	0									41.37		9	13	11.66	7.58	275.64	48.28	22.55	0	46902			9	10	15.56	2.99	134.04	23.88	7.86	0				9	1	24.83	26.88	807.03	139.85	58.51	1.32
2010	4	9	498.73	0.11	6.56	1.19	0.33	0									43.67		10	13	20.34	3.24	30.82	5.27	4.03	0	22345			10	10	16.44	1.27	14.26	2.37	1.69	0				10	1	29.18	8.01	75.37	11.84	10	0.49
2010	4	10	2541.89	0.75	33.04	5.86	1.33	0									23.88		11	13	11.18	1.89	16.97	2.75	1.86	0	14939			11	10	7.54	0.73	7.66	1.26	0.66	0				11	1	10.38	5.52	52.55	7.87	5.5	0.18
2010	4	11	613.23	2.29	18.98	3.13	0.83	0									105.93		12	13	166.2	38.18	1329.75	238.13	29.91	0	532653			12	10	67.51	16.99	637.74	113.3	10.48	0				12	1	132.01	135.4	4193.68	703.82	108.83	0.61
2010	4	12	1957.43	6.11	204.66	27.45	9.25	0.09									69.05	2015	1	13	3030.67	38.16	1666.62	296.82	32.04	0	831665		2015	1	10	3110.96	16.95	822.93	147.14	11.61	0			2015	1	1	5945.96	138.74	5089.36	855.97	114.72	0.31
2010	4	13	2270.05	1.42	61.33	11.27	3.19	0									11.19		2	13	4627.4	2.38	90.74	15.9	2.7	0	593551			2	10	5285.1	1.17	45.98	8.13	1.16	0				2	1	11652.2	9.22	206.47	32.91	7.49	0.07
2010	4	14	1316.78	3.34	186.68	24.74	7.24	0									56.06		3	13	5254.72	18.73	765.69	139.98	17.15	0	604066			3	10	4904.94	7.73	361.39	65.18	6.51	0				3	1	11488.1	64.36	1925.92	327.87	50.99	0.23
2010	4	15	626.36	0.28	3.28	0.74	0.01	0									41.47		4	13	2931.13	10.53	383.89	70.84	13.65	0	440588			4	10	3321.92	4.37	184.67	33.09	5	0				4	1	7021.57	39.55	903.23	150.48	36.61	0.3
2010	4	16	634.6	0.15	3.78	0.75	0.08	0									38.67		5	13	1568.88	7.9	225.18	47.11	11.01	0	230047			5	10	1849.75	2.61	96.54	18.31	3.58	0				5	1	3943.22	24	538.42	96.89	25.59	0.32
2010	4	17	392.54	0.08	2.77	0.63	0.01	0	29246.2	34.02	859.92	132.5	39.54	0.36			74.15		6	13	584.08	35.81	1420.72	410.66	57.46	0	207310			6	10	644.75	10.05	333.36	84.65	10.71	0				6	1	1946.99	77.25	1903.68	459.8	75.02	0.87
2010	5	1	1745.61	181.06	7027.14	1290.72	173.24	0.56									80.05		7	13	248.91	33.39	1144.7	292.05	44.96	0	213324			7	10	244.34	9.16	315.26	69.12	9.6	0				7	1	568.32	68.56	1940.06	407.35	71.59	1.12
2010	5	2	1078.17	50.1	3479.02	632.73	32.05	0									25.48		8	13	540.76	4.57	98.33	17.83	7.15	0	63032			8	10	357.09	2.31	49.49	8.76	2.77	0				8	1	974.45	19.33	395.87	66.6	26.24	0.69
2010	5	3	666.96	45.7	2774.04	527.68	31.73	0.16									47.17		9	13	39.26	8.94	388.21	68.32	27.74	0	60829			9	10	37.55	3.71	202.26	36	10.47	0				9	1	63.46	27.9	839.71	145.64	54.02	1.28
2010	5	4	1660.41	169.51	6789.26	1230.26	168.77	0.48									26.48		10	13	18.83	2.77	54.36	9.3	4.21	0	25792			10	10	15.64	1.16	26.92	4.6	1.65	0				10	1	24.22	8.38	148.86	24.25	10.59	0.33
2010	5	5	385.46	30.31	2198.77	421.26	23.49	0.08									129.51		11	13	121.09	46.86	1717.98	305.16	46.35	0	597703			11	10	54.45	20.78	845.85	149.88	16.3	0				11	1	119.96	150.82	5437.25	921.78	139.2	0.86
2010	5	6	185.39	13.67	1330.08	264.98	11.55	0									63.66		12	13	1898.98	39.47	2252.41	400.3	42.35	0	791500			12	10	2087.71	18.35	1135.55	202.57	15.67	0				12	1	3963.29	153.76	7029.45	1196.18	162.83	0.58
2010	5	7	347.05	9.7	241.92	62.2	0.92	0									61.26	2016	1	13	4845.7	62.32	3286.93	593.18	34.08	0	1360005		2016	1	10	5308.2	26	1616.85	292.05	13.31	0			2016	1	1	11276.3	181.51	7250.2	1255.8	127.35	0.12
2010	5	8	339.51	6.83	549.52	105.27	1.02	0									56.56		2	13	6344.8	26.28	1409.79	252.14	27.66	0	1084657			2	10	7505.2	11.91	727.13	128.92	10.5	0				2	1	15804.7	73.62	2707.79	453.33	62.03	0.25
2010	5	9	157.57	9.27	607.99	112.08	4.82	0									43.27		3	13	6660.3	11.26	426.94	77.17	10.5	0	815512			3	10	7916.5	4.84	211.38	37.99	3.94	0				3	1	16990.4	51.16	1395.39	235.74	37.03	0.22
2010	5	10	840.27	17.84	1113.7	212.82	17.66	0									20.69		4	13	4162.59	4.36	153.05	29.63	5.29	0	463709			4	10	4861	1.61	69.23	12.62	1.93	0				4	1	10795.7	18.1	522.13	89.95	17.28	0.09
2010	5	11	670.82	42.12	1212.66	255.7	29.17	0									45.77		5	13	1796.84	25.78	1277.19	301.96	31.92	0	402412			5	10	2088.96	6.95	419.86	84.66	8.43	0				5	1	4162.11	62.19	2512.54	489.54	59.96	0.44
2010	5	12	687.35	70.21	2462.94	422.3	67.35	0.24									81.55		6	13	592.12	87.72	4753.98	1377.26	101.43	0	595260			6	10	632.02	23.03	1122.2	282.74	18.95	0				6	1	1701.62	176.58	6138.09	1486.57	143.52	0.78
2010	5	13	829.37	57.44	2814.2	595.2	55.36	0									134.31		7	13	303.62	68.38	2821.21	589.79	77.01	0	726479			7	10	298.26	24.61	1144.9	214.26	23.61	0				7	1	553.87	183.55	6399.87	1160.83	214.97	1.58
2010	5	14	225.78	21.85	1208.83	162.99	30.5	0									85.04		8	13	1198.43	28.81	992.96	174.34	44.93	0	334892			8	10	576.1	13.68	482.1	83.39	16.11	0				8	1	853.97	99.3	3023.07	500.68	130.83	1.74
2010	5	15	346.34	11.53	370.77	87.13	0.11	0									32.88		9	13	2613.37	4.37	223.79	39.47	11.38	0	95107			9	10	2983.56	1.84	126.91	22.87	4.73	0				9	1	8099.82	22.53	769.77	128.11	49.64	0.75
2010	5	16	244	7.61	359.08	75.9	4.42	0									92.84		10	13	523.52	30.14	1677.32	294.11	54.85	0	383675			10	10	668.45	13.07	859.64	151.63	19.54	0				10	1	851.19	105.1	4648.05	783.52	152.94	1.32
2010	5	17	168.52	3.83	321.74	78.25	0.14	0	10578.6	748.58	34861.7	6537.47	652.3	1.52			114.12		11	13	4941.55	61.11	3562.77	630.34	65.77	0	1241905			11	10	6479.09	27.32	1798.82	319.42	23.85	0				11	1	12119	215.63	9701.3	1637.21	213.92	0.56
2010	6	1	998.03	55	1674.59	340.21	63.01	0.88									42.17		12	13	9501.6	11.97	524.49	91.81	12.13	0	1069174			12	10	11634.7	5.47	268.68	47.62	4.7	0				12	1	25526.9	49.6	1483.17	244.62	38.94	0.22
2010	6	2	604.01	16.62	816.6	154.87	15.11	0									62.06	2017	1	13	10026.8	23.21	1036.03	182.71	20.25	0	1171679		2017	1	10	11883.1	9.83	529.76	94.78	7.9	0			2017	1	1	25278.7	82.05	2934.45	493.05	65.41	0.19
2010	6	3	336.88	14.09	587.34	124.67	13.48	0.25									70.95		2	13	8381.8	57.53	3412.98	613.35	43.57	0	1597156			2	10	10004.7	23.7	1667.18	297.6	16.51	0				2	1	19526.2	202.87	9970.65	1694.93	168.82	0.2
2010	6	4	1017.01	51.25	1572	309.11	60.67	0.74									54.06		3	13	12740.2	17.15	770.06	138.34	15.75	0	1426766			3	10	14346.6	7.68	390.06	69.54	6.46	0				3	1	29887.6	62.53	2236.38	377.16	52.31	0.16
2010	6	5	151.85	8.56	432.3	93.15	9.88	0.13									87.34		4	13	7971.7	29.59	1178.25	223.89	25.45	0	1150399			4	10	9401	10.48	532.34	95.69	9.04	0				4	1	19313.7	107.09	3377.77	576.36	80.84	0.28
2010	6	6	66.68	3.81	263.21	61.61	4.81	0									22.48		5	13	6769.9	7.77	310.77	64.33	8.99	0	756924			5	10	7808.4	2.68	129.18	24.05	3.14	0				5	1	16937.4	27.22	925.07	163.26	29.19	0.15
2010	6	7	190.63	3	104.7	31.93	0.7	0									88.44		6	13	2658.8	67.48	3138.64	903.53	85.35	0	648976			6	10	3010.49	17.25	779.71	191.17	16.94	0				6	1	7517.9	133.33	5137.97	1163.17	139.45	0.76
2010	6	8	177.73	2.04	137.55	29.88	0.52	0									150.5		7	13	1139.43	133.14	6418.98	1724.37	162.41	0	1179747			7	10	1055.22	37.74	1795.88	405.76	36.54	0				7	1	2022.23	282.29	11120.7	2407.21	290.55	1.61
2010	6	9	61.66	2.2	109.65	21.65	2.14	0									58.06		8	13	2361.26	17.39	647.44	110.39	31.68	0	301634			8	10	1389.65	8.57	320.96	53.35	12.05	0				8	1	3066.81	56.84	1471.74	236.67	77.72	1.13
2010	6	10	312.54	7.3	348.87	71.48	10.62	0									126.22		9	13	1354.74	100.29	8628.82	1551.24	193.83	0	1130681			9	10	1489.01	49.73	4426.72	795.14	72.01	0				9	1	2772.96	368.33	22767.6	3950.12	559.93	2.12
2010	6	11	553.69	14.19	348.23	86.88	10.98	0									104.83		10	13	16584	39.05	2655.49	470.61	69.03	0	960932			10	10	18771.4	15.29	1346.17	239.72	25.71	0				10	1	42486.1	160.34	8033.66	1362.07	237.68	1.08
2010	6	12	641.86	27.15	841.47	152.15	36.76	0.45									61.66		11	13	9052.2	21.24	876.18	154.31	17.65	0	1192424			11	10	10510	9.19	440.28	77.58	6.91	0				11	1	21657.7	77.43	2642.31	441.82	58.89	0.2
2010	6	13	358.95	23.85	1038.41	255.76	41.68	0									91.94		12	13	13330.2	47.6	2213.79	391.7	34.02	0	2166782			12	10	15150.8	20.69	1116.25	197.05	13.87	0				12	1	30890.5	168.16	5399.96	902.31	105.34	0.22
2010	6	14	186.33	10.31	487.24	65.39	21.12	0									54.16	2018	1	13	14549.6	20.34	957.46	170.72	15.67	0	1670138		2018	1	10	16429.1	8.75	479.3	85.32	6.28	0			2018	1	1	36272.5	72.13	2959.39	500.18	53.99	0.17
2010	6	15	221.3	2.95	135.92	38.67	0.08	0									30.98		2	13	11666.5	3.52	158.74	28.01	3.78	0	1159661			2	10	13144.4	1.73	83.94	14.75	1.72	0				2	1	30608.5	13.54	360.95	58.51	10.05	0.06
2010	6	16	122	2.39	105.03	26.28	2.2	0									33.08		3	13	9220.4	15.52	762.47	137.94	13.07	0	1061303			3	10	10113.2	6.85	367.98	65.21	5.15	0				3	1	24445.6	49.4	1611.84	273.16	31.21	0.1
2010	6	17	96.27	0.95	92.47	28.63	0.07	0	6097.42	245.66	9095.58	1892.32	293.83	2.45			39.27		4	13	7153	13	447.96	93.49	10.11	0	815590			4	10	8057	4.85	169.8	32.23	3.25	0				4	1	18898.5	51.68	1522.06	268.74	34.13	0.14
2010	7	1	226.01	185.75	5973.72	1062.25	188.09	1.58									8.29		5	13	3432.61	0.31	2.94	0.93	1.14	0	274081			5	10	4076.86	0.09	0.71	0.21	0.62	0				5	1	9523.4	0.53	3.48	1.04	2.01	0.13
2010	7	2	123.08	57.06	3074.8	542.29	36.37	0									28.28		6	13	1195.72	5.36	87.45	32.29	9.89	0	105263			6	10	1404.77	1.75	17.74	6.37	2.25	0				6	1	3292.1	10.64	112.64	36.78	11.89	0.55
2010	7	3	76.05	46.56	2222.16	409.7	31.41	0.46									75.25		7	13	375.55	37.61	1302.28	240.44	32.05	0	534679			7	10	461.57	14.14	602.6	107.51	11.52	0				7	1	1008.43	118.99	4047.25	689.02	121	0.91
2010	7	4	192.49	170.68	5786.98	1018.94	183.13	1.33									52.76		8	13	341.08	9.35	220.6	39.5	18.76	0	106945			8	10	209.13	3.97	97.68	16.85	6.72	0				8	1	528.4	28.97	436.1	71.52	31.57	0.94
2010	7	5	40.45	28.48	1704.5	317.32	22.91	0.25									38.47		9	13	43.43	11.16	943.57	165.81	51.31	0	91580			9	10	48.52	4.07	422.14	75.18	15.88	0				9	1	94.85	43.92	2219.49	388.4	110.28	2.21
2010	7	6	19.75	12.36	996.33	191.89	11.08	0									35.48		10	13	310.39	2.56	39.77	6.88	3.09	0	29089			10	10	726.57	0.54	24.35	4.25	1.31	0				10	1	1265	6.78	93.19	14.84	7.76	0.35
2010	7	7	76.26	13.61	190.47	44.46	1.2	0									21.49		11	13	11.99	4.1	110.55	18.92	5.74	0	42393			11	10	11.58	1.71	46.4	7.96	1.98	0				11	1	7.58	11.44	218.42	35.65	11.04	0.24
2010	7	8	57.1	9.83	472.52	87.3	1.16	0									88.24		12	13	36.66	18.04	460.31	80.83	11.79	0	210057			12	10	19.61	7.19	196.43	34.12	4.02	0				12	1	27.36	55.46	1218.44	202.33	33.09	0.26
2010	7	9	19.17	8.9	465.23	84.43	4.88	0									66.66	2019	1	13	1360.41	17.31	482.39	83.56	15.33	0	355029		2019	1	10	1003.75	7.45	225.22	38.54	5.73	0			2019	1	1	1685.33	61.03	1340.53	216.55	43.34	0.26
2010	7	10	99.49	23.56	1000.96	186.24	20.93	0									26.48		2	13	2654.42	7.83	275.23	48.23	7.27	0	425320			2	10	3063.76	3.15	128.67	22.46	2.73	0				2	1	6355.7	27.4	845.52	139.36	24.27	0.13
2010	7	11	60.71	46.25	1050.46	209.27	38.95	0									84.74		3	13	6371.4	41.37	1752.12	311.15	32.89	0	1177140			3	10	7779.3	16.93	831.23	146.25	12.3	0				3	1	15535.1	138.46	4850.93	805.49	113.93	0.36
2010	7	12	73.45	79.95	2196.9	364.24	95.89	0.74									13.29		4	13	6457.9	4.03	111.41	21.52	5.23	0	566577			4	10	7245.6	1.32	49.31	8.96	1.84	0				4	1	16419.8	15	314.93	54.44	14.1	0.13
2010	7	13	120.82	62.37	2417.65	489.92	66.52	0									49.27		5	13	2596.76	13.62	317.15	71.52	13.97	0	281845			5	10	2952.11	4.11	115.51	22.88	3.71	0				5	1	6358.3	39.41	737.94	136.17	31.12	0.35
2010	7	14	15.7	27.85	1099.65	149.53	48.18	0									57.26		6	13	829.49	65.55	3397.9	870.43	82.28	0	610665			6	10	933.53	19.62	955.29	208	18.43	0				6	1	2625.32	138.34	4218.95	939.53	124.87	0.83
2010	7	15	99.51	15.24	285.33	64.36	0.12	0									43.87		7	13	302.33	8.52	122.93	28.06	9.46	0	78552			7	10	368.86	2.53	43.61	8.6	2.78	0				7	1	732.49	20.82	302.84	55.02	21.48	0.53
2010	7	16	46.97	9.08	293.13	59.97	4.53	0									26.68		8	13	357.37	2.78	28.05	5.82	2.73	0	34713			8	10	186.73	1.01	12.75	2.34	1.33	0				8	1	514.16	10.46	108.2	17.53	9.32	0.42
2010	7	17	42.86	5.36	238.27	55.76	0.14	0	1389.87	802.89	29469.1	5337.87	755.49	4.36			112.32		9	13	131.34	34.35	2056.02	363.54	65.8	0	241037			9	10	348.52	12.74	998.19	177.71	23.12	0				9	1	585.03	114.22	5736.77	992.37	189.74	2.1
2010	8	1	380.3	146.17	3746.46	635.27	182.35	2.52									106.93		10	13	672.31	69.11	5989.14	1059.95	108.65	0	890315			10	10	897.57	26.34	2941.27	520.81	37.62	0				10	1	2309.59	227.86	13568.7	2334.99	309.9	1.2
2010	8	2	325.44	46.92	1961.71	336.24	39.77	0									54.16		11	13	821.11	16.01	627.15	107.84	18.67	0	317034			11	10	392.87	7	311.8	53.77	7.22	0				11	1	827.68	56.13	1766.76	288.79	57.47	0.43
2010	8	3	132.06	37.26	1373.74	240.72	38.69	0.73									48.57		12	13	2296.34	8.2	276.23	46.61	9.65	0	375339			12	10	2673.35	3.77	140.57	24.15	3.82	0				12	1	5419.65	36.29	963.66	153.47	35.28	0.24
2010	8	4	288.01	135.68	3644.19	615.9	177.41	2.16
2010	8	5	56.65	21.86	1041.33	184.87	29.03	0.39
2010	8	6	68.12	9.15	593.26	107.5	14.24	0
2010	8	7	266.3	9.11	106.8	20.63	0.81	0
2010	8	8	146.35	7.53	295.17	51.66	1.17	0
2010	8	9	63.49	5.96	289.28	51.08	6.36	0
2010	8	10	271.61	19.52	658.65	116.51	23.28	0
2010	8	11	73.74	35.97	684.88	116.8	28.26	0
2010	8	12	104.1	63.93	1485.48	224.35	77.53	0.9
2010	8	13	417.02	43.8	1417.16	257.68	66.01	0
2010	8	14	152.49	22.95	783	105.94	40.37	0
2010	8	15	342.73	10.63	159.27	30.77	0.1	0
2010	8	16	168.73	6.25	178.43	32.89	3.29	0
2010	8	17	171.69	3.71	132.76	26.2	0.12	0	3428.83	626.4	18551.6	3155.01	728.79	6.7
2010	9	1	113749	451.42	46060.6	8285.98	1161.69	3.11
2010	9	2	54638.2	116.35	23400.2	4274.91	248.12	0
2010	9	3	44026	99.43	17912.2	3282.34	197.93	0.84
2010	9	4	105021	430.51	44860.9	8070.07	1124.89	2.51
2010	9	5	27770.6	67.77	14128.3	2601.08	131.39	0.4
2010	9	6	13545.6	27.94	8105.42	1503.73	48.86	0
2010	9	7	11281.8	12.92	1207.44	222.75	5.87	0
2010	9	8	17035.9	10.16	3737.35	683.51	7.93	0
2010	9	9	10991.9	18.42	4318.28	797.56	23.51	0
2010	9	10	48279.5	34.49	8479.83	1574.29	90.63	0
2010	9	11	4365.8	71.87	5441.14	934.76	131.24	0
2010	9	12	3764.22	156.11	13240.3	2001.96	417.03	1.47
2010	9	13	40816.8	124.32	16524.9	3044.59	339.53	0
2010	9	14	157.03	64.71	7544.04	1038.92	232.83	0
2010	9	15	5565.38	15.92	1798.77	337.02	0.36	0
2010	9	16	8350.49	12.59	2178.26	405.67	21.06	0
2010	9	17	5491.55	4.96	1720.93	328.42	0.9	0	514851	1719.89	220659	39387.6	4183.77	8.33
2010	10	1	1725.04	30.44	948.83	158.9	33.29	0.44
2010	10	2	907.47	9.44	499.01	86.68	8.06	0
2010	10	3	715.52	7.34	327.76	57.21	6.88	0.13
2010	10	4	1513.25	28.71	914.41	152.94	32.18	0.38
2010	10	5	437.71	4.26	245.97	43.56	4.99	0.07
2010	10	6	224.77	1.79	141.27	25.46	2.29	0
2010	10	7	398.91	1.3	35.23	6.37	0.23	0
2010	10	8	332.19	1.09	70.53	12.55	0.22	0
2010	10	9	228.47	1.04	69.91	12.53	1.15	0
2010	10	10	3727.92	3.87	486.36	85.75	12.94	0
2010	10	11	357.38	6.52	134.14	21.43	3.32	0
2010	10	12	339	24.61	1873.6	252.63	73.23	0.81
2010	10	13	2198.03	7.93	802.03	143.75	32.26	0
2010	10	14	11.31	14.15	1746.37	234.23	60.35	0
2010	10	15	432.9	1.42	29.35	5.5	0.02	0
2010	10	16	403.39	0.97	40.92	7.41	0.64	0
2010	10	17	260.29	0.5	26.47	5.06	0.02	0	14213.5	145.38	8392.16	1311.96	272.07	1.83
2010	11	1	2233.75	166.17	6542.43	1113.57	165.32	0.71
2010	11	2	1332.24	53	3408.33	594.44	36.45	0
2010	11	3	1064.42	43.95	2407.83	425.22	35.19	0.2
2010	11	4	2005.35	157.24	6390.35	1087.16	160.29	0.59
2010	11	5	653.19	29.19	1904.78	339.91	25.99	0.1
2010	11	6	305.97	13.02	1120.02	202.24	12.26	0
2010	11	7	541.95	6.72	156.15	28.43	0.65	0
2010	11	8	590.36	6.09	464.73	82.56	0.98	0
2010	11	9	317.93	8.49	544.83	98.39	5.43	0
2010	11	10	1642.03	21.58	1149.86	206.88	20.09	0
2010	11	11	644.24	30.77	872.84	143.02	16.85	0
2010	11	12	876.77	78.18	3361	476.74	86.38	0.34
2010	11	13	1325.48	46.63	2287.92	409.44	54.12	0
2010	11	14	321.21	40.41	2442.48	330.21	57.94	0
2010	11	15	534.07	8.07	211.01	39.38	0.07	0
2010	11	16	409.04	5.81	258.86	47.19	3.01	0
2010	11	17	272.72	2.68	200.57	37.99	0.1	0	15070.7	718	33724	5662.77	681.12	1.94
2010	12	1	9553.3	3.14	54.76	8.63	2.64	0.03
2010	12	2	5047.9	1.11	28.93	4.79	0.56	0
2010	12	3	4005.52	0.74	18.57	3.14	0.83	0.01
2010	12	4	9642.2	2.98	54.1	8.54	2.55	0.03
2010	12	5	2416.69	0.42	15.14	2.63	0.66	0
2010	12	6	1119.06	0.16	8.83	1.56	0.33	0
2010	12	7	1357.43	0.12	0.7	0.12	0.02	0
2010	12	8	1722.18	0.1	2.47	0.41	0.02	0
2010	12	9	931.46	0.1	4.61	0.85	0.18	0
2010	12	10	4833.9	0.25	8.14	1.47	0.38	0
2010	12	11	1115.96	0.75	9.1	1.35	0.32	0
2010	12	12	2114.77	2.31	74.03	9.7	2.42	0.01
2010	12	13	3896.94	0.5	13.75	2.4	0.72	0
2010	12	14	949.85	1.4	64.58	8.41	1.79	0
2010	12	15	1248.74	0.13	0.94	0.16	0	0
2010	12	16	1278.32	0.07	1.11	0.19	0.03	0
2010	12	17	789.01	0.04	0.93	0.17	0	0	52023.2	14.32	360.69	54.52	13.45	0.08
2011	1	1	7286.3	225.76	9998.97	1724.36	181.62	0.2
2011	1	2	4031.73	66.45	5188.57	919.46	35	0
2011	1	3	2819.29	58.32	3769.71	677.08	32.21	0.05
2011	1	4	6776.3	214.35	9768.72	1683.54	176.71	0.16
2011	1	5	1758.83	41.22	3012.73	546.16	23.34	0.03
2011	1	6	857.2	18.88	1769.08	323.97	10.81	0
2011	1	7	1190.21	8.93	234.81	43.12	0.65	0
2011	1	8	1333.27	7.7	711.15	127.56	1	0
2011	1	9	719.63	13.91	879.74	160.93	4.81	0
2011	1	10	3622.88	27.28	1772.45	323.15	19.52	0
2011	1	11	1213.07	38.39	1273.15	210.5	21.56	0
2011	1	12	1933.4	98.54	4524.97	644.13	103.16	0.18
2011	1	13	3191.41	61.24	3548.58	645.71	49.69	0
2011	1	14	920.51	51.92	3175.68	426.35	70.95	0
2011	1	15	1145.55	11.22	322.36	60.47	0.07	0
2011	1	16	1044.77	8.25	403.07	73.94	3.83	0
2011	1	17	701.98	3.65	311.12	59.37	0.1	0	40546.3	956.01	50664.9	8649.8	735.03	0.62
2011	2	1	28540.6	261.73	12238.5	2128.73	208.96	0.22
2011	2	2	14274	78.53	6265.36	1113.74	45.25	0
2011	2	3	10871.4	66.64	4654.76	841.57	29.77	0.06
2011	2	4	26107.2	245.52	11932.3	2073.4	203.93	0.17
2011	2	5	6963.21	47.22	3699	674.38	21.51	0.03
2011	2	6	3428.96	22.02	2160.39	397.91	9.86	0
2011	2	7	3362.28	13.88	307.34	57.25	1.02	0
2011	2	8	4545.62	10.35	898.13	161.88	0.96	0
2011	2	9	2740.16	16.81	1088.78	199.28	4.46	0
2011	2	10	12861.2	32.45	2285.18	418.36	19.35	0
2011	2	11	2533.99	47.43	1569.01	261.85	29.82	0
2011	2	12	13713.5	113.62	5492.22	789.95	127.27	0.27
2011	2	13	11351.3	75.69	4590.33	846.23	49.62	0
2011	2	14	11489	54.06	3836.51	520.67	80.79	0
2011	2	15	2774.66	17.07	420.54	79.6	0.07	0
2011	2	16	3001.89	10.7	520.51	96.26	3.85	0
2011	2	17	1838.52	5.53	396.19	76.23	0.09	0	160397	1119.25	62355.1	10737.3	836.58	0.75
2011	3	1	11860.5	77.39	3017.94	517.31	60.38	0.17
2011	3	2	6347.1	25.99	1567.81	274.4	13.78	0
2011	3	3	4673.16	19.5	1127.58	200.45	12.32	0.05
2011	3	4	10889.6	73.14	2950.14	505.23	58.54	0.14
2011	3	5	2910.67	12.26	900.54	161.77	9.02	0.02
2011	3	6	1534.34	5.13	529.94	96.38	4.16	0
2011	3	7	1634.42	3.32	69.51	12.88	0.26	0
2011	3	8	2135.4	2.87	212.74	37.77	0.38	0
2011	3	9	1371.22	3.51	261.23	47.44	1.95	0
2011	3	10	5803.7	8.86	515.19	93.11	7.4	0
2011	3	11	1318.89	16	392.26	64.8	6.58	0
2011	3	12	2944.8	36.72	1451.31	205.95	34.88	0.15
2011	3	13	5230.1	19.96	1018.31	183.31	19.52	0
2011	3	14	1773.02	17.74	1037.73	139.53	23.57	0
2011	3	15	1548.48	3.86	97.28	18.26	0.03	0
2011	3	16	1588.61	2.67	119.17	21.73	1.17	0
2011	3	17	1019.16	1.28	94.41	17.99	0.04	0	64583.2	330.2	15363.1	2598.31	253.98	0.53
2011	4	1	7737.3	18.89	443.87	74.15	16.84	0.13
2011	4	2	3788.66	6.48	233.78	40.09	3.72	0
2011	4	3	2927.61	4.27	161.77	28.43	3.88	0.04
2011	4	4	7048.9	17.9	434.86	72.49	16.32	0.11
2011	4	5	1885.55	2.3	129.36	23.07	2.9	0.02
2011	4	6	970.07	0.81	76.64	13.92	1.33	0
2011	4	7	981.84	0.77	9.45	1.86	0.08	0
2011	4	8	1275.37	0.63	29.17	5.14	0.11	0
2011	4	9	779.54	0.5	36.91	6.69	0.69	0
2011	4	10	3365.36	1.56	67.02	12.1	2.04	0
2011	4	11	792.3	4.64	64.67	10.57	1.94	0
2011	4	12	1353.09	9.96	247.39	34.42	10.26	0.08
2011	4	13	3021.11	3.6	129.93	23.42	4.79	0
2011	4	14	510.99	4.7	179.8	23.73	7.03	0
2011	4	15	912.55	0.82	13.58	2.65	0.01	0
2011	4	16	935.62	0.48	15.8	2.94	0.21	0
2011	4	17	616.04	0.25	13.19	2.59	0.01	0	38901.9	78.56	2287.19	378.26	72.16	0.38
2011	5	1	3141.33	13.17	188.14	35.73	13.68	0.32
2011	5	2	1588.28	3.98	91.76	16.76	2.82	0
2011	5	3	1184.33	3.13	65.11	13.24	3.64	0.09
2011	5	4	2828.21	11.94	176.95	32.42	13.17	0.28
2011	5	5	741.92	1.62	46.55	9.7	2.77	0.05
2011	5	6	381.44	0.63	28.07	6.42	1.49	0
2011	5	7	451.92	1.07	11.61	3.45	0.16	0
2011	5	8	555.37	0.67	15.6	3.33	0.12	0
2011	5	9	309.34	0.32	11.39	2.26	0.58	0
2011	5	10	1472.32	1.38	26.14	5.52	1.77	0
2011	5	11	330.97	3.69	47.72	10.97	2.66	0
2011	5	12	541.86	5.72	80.45	15.02	5.74	0.08
2011	5	13	1322.13	4.5	68.53	16.82	5.38	0
2011	5	14	187.06	1.71	33	4.3	2.37	0
2011	5	15	430.4	1.23	17.48	4.74	0.03	0
2011	5	16	416.3	0.58	11.79	2.93	0.29	0
2011	5	17	276.98	0.4	11.56	3.39	0.02	0	16160.2	55.74	931.85	187	56.69	0.82
2011	6	1	1596.56	12.15	130.21	37.07	14.3	0.64
2011	6	2	816.7	2.82	43.39	11.67	2.6	0
2011	6	3	497.55	3.07	45.5	13.8	4.15	0.2
2011	6	4	1491.43	10.67	105.76	28.25	13.45	0.58
2011	6	5	274.21	1.64	27.57	8.92	3.07	0.12
2011	6	6	116.14	0.59	20.17	7.33	1.7	0
2011	6	7	179.58	1.25	25.17	9.14	0.45	0
2011	6	8	228.28	0.67	17.27	5.28	0.22	0
2011	6	9	97.8	0.34	4.71	1.54	0.57	0
2011	6	10	508.01	1.75	18.36	6.06	2.23	0
2011	6	11	372.2	3.49	57.75	18.04	4.63	0
2011	6	12	553.85	4.56	64.5	18.59	6.37	0.13
2011	6	13	478.76	5.71	83.45	28.64	10.49	0
2011	6	14	179.67	0.57	8.25	1.24	0.88	0
2011	6	15	171.5	1.3	42.74	13.32	0.07	0
2011	6	16	157.75	0.84	20.3	6.43	0.75	0
2011	6	17	102.2	0.44	21.19	8.04	0.06	0	7822.19	51.86	736.29	223.36	65.99	1.67
2011	7	1	306.99	246.08	8521.1	1626.22	282.66	1.95
2011	7	2	156.73	76.8	4189.8	768.27	69.65	0
2011	7	3	113.1	62.29	3264.77	644.88	51.56	0.55
2011	7	4	262.07	225.91	8157.27	1524.81	274.43	1.65
2011	7	5	59.71	38.67	2494.48	496.5	38.2	0.3
2011	7	6	43.2	17.26	1506.66	317.35	18.9	0
2011	7	7	123.28	17.74	370.11	103.81	2.45	0
2011	7	8	77.36	12.13	717.77	143.6	1.81	0
2011	7	9	30.86	11.32	672.53	126.03	7.74	0
2011	7	10	140.79	31.97	1438.47	284.22	31.13	0
2011	7	11	116.69	63.74	1834.82	412	55.57	0
2011	7	12	115.96	106.92	3340.76	614.54	125.47	0.77
2011	7	13	205.26	94.66	4146.66	937.49	114	0
2011	7	14	26.69	32.64	1357.13	183.66	54.09	0
2011	7	15	173.31	19.58	620	156.78	0.24	0
2011	7	16	81.1	12.26	513.41	117.21	7.43	0
2011	7	17	68.4	6.87	441.41	119.96	0.26	0	2101.5	1076.84	43587.2	8577.33	1135.59	5.22
2011	8	1	845.48	161.2	5327.72	894.04	202.11	2.44
2011	8	2	646.9	53.16	2786	475.59	46.32	0
2011	8	3	302.49	42.36	1970.31	340.34	45.9	0.71
2011	8	4	682.55	150.92	5200.09	871.51	196.3	2.1
2011	8	5	175.5	25.79	1531.08	267.21	34.48	0.38
2011	8	6	114.42	10.81	891.06	157.57	16.24	0
2011	8	7	321.94	8.45	134.13	24.26	0.87	0
2011	8	8	228.31	7.98	403.47	69.87	1.33	0
2011	8	9	99.59	7.03	435.16	76.41	7.82	0
2011	8	10	510.63	22.96	904.96	158.88	25.73	0
2011	8	11	253.04	33.07	808.93	132.49	23.08	0
2011	8	12	650.31	68.43	2175.03	315.48	86.89	0.78
2011	8	13	691.56	46.11	1810.74	319.61	69.53	0
2011	8	14	496.34	29.92	1336.89	180.29	52.82	0
2011	8	15	390.88	9.55	196.36	35.95	0.1	0
2011	8	16	207.24	6.76	229.83	40.88	3.94	0
2011	8	17	176.9	3.63	181.13	33.5	0.14	0	6794.08	688.13	26322.9	4393.88	813.6	6.41
2011	9	1	877.04	103.17	5738.99	1004.18	195.71	2.19
2011	9	2	493.72	28.28	3026.55	543.83	44.47	0
2011	9	3	326.1	23.02	2187.25	393.31	46.57	0.64
2011	9	4	781.12	98.35	5604.47	980.7	190.12	1.9
2011	9	5	190.59	14.44	1742.39	315.32	35.32	0.33
2011	9	6	99.29	4.96	1021.21	186.25	16.92	0
2011	9	7	234.54	2.8	140.67	25.71	0.79	0
2011	9	8	196.76	2.92	445.2	80.8	1.19	0
2011	9	9	121.36	3.69	517.58	95.02	7.65	0
2011	9	10	499.45	11.6	1039.4	189.97	26.83	0
2011	9	11	341.14	13.64	645.32	108.07	16.67	0
2011	9	12	600.67	37.99	2329.29	334.19	98.93	1.22
2011	9	13	613.84	20.17	1982.85	357.78	70.88	0
2011	9	14	221.19	19.77	1654.2	224	70.12	0
2011	9	15	291.6	2.81	198.83	37.2	0.09	0
2011	9	16	139.86	3.36	246.09	45.36	3.97	0
2011	9	17	132.39	1.21	200.32	38.16	0.12	0	6160.66	392.18	28720.6	4959.85	826.35	6.28
2011	10	1	7649.3	5.26	170.23	27.38	14.54	0.34
2011	10	2	3682.76	0.77	92.71	16.11	2.71	0
2011	10	3	2973.53	1.13	65.55	11.12	4.1	0.1
2011	10	4	7121.87	4.86	167.26	26.93	14.1	0.31
2011	10	5	1985.19	0.52	55.81	9.64	3.13	0.06
2011	10	6	963.24	0.13	33.53	5.89	1.53	0
2011	10	7	724.29	0.25	3.52	0.62	0.06	0
2011	10	8	1051.2	0.16	10.14	1.77	0.08	0
2011	10	9	795.84	0.09	17.5	3.14	0.72	0
2011	10	10	3169.56	0.27	40.29	7.29	1.52	0
2011	10	11	384.31	0.81	20.35	3.25	1.25	0
2011	10	12	428.82	2.6	73.39	9.61	7.27	0.14
2011	10	13	2831.41	0.67	78.61	13.9	3.98	0
2011	10	14	15.96	1.51	52.65	6.46	5.22	0
2011	10	15	651.31	0.34	4.69	0.84	0.01	0
2011	10	16	793.83	0.09	8.06	1.45	0.15	0
2011	10	17	527.22	0.11	4.64	0.86	0.01	0	35749.6	19.57	898.93	146.26	60.38	0.95
2011	11	1	395.35	23.7	832.72	139.39	28.25	0.36
2011	11	2	374.81	6.98	433.89	75.63	5.99	0
2011	11	3	151.29	5.98	318.37	55.35	6.99	0.11
2011	11	4	566.15	22.47	814.39	136.33	27.42	0.33
2011	11	5	139.75	3.82	255.12	44.76	5.29	0.06
2011	11	6	81.98	1.59	153.37	27.27	2.48	0
2011	11	7	79.71	0.87	19.09	3.4	0.13	0
2011	11	8	85.77	0.83	61.74	10.93	0.17	0
2011	11	9	72.23	0.96	71.41	12.72	1.2	0
2011	11	10	220.99	3.21	135.59	23.84	3.74	0
2011	11	11	81.03	3.83	111.65	18.25	2.79	0
2011	11	12	4728.6	8.46	380.09	55.59	13.39	0.13
2011	11	13	288.94	5.97	267.68	46.13	9.87	0
2011	11	14	4674.97	3.59	264.15	37.38	8.45	0
2011	11	15	74.35	0.91	28.44	5.21	0.02	0
2011	11	16	52.84	0.74	34.42	6.2	0.38	0
2011	11	17	43.33	0.38	28.28	5.28	0.02	0	12112.1	94.29	4210.4	703.66	116.58	0.99
2011	12	1	3550.94	56.69	1642.22	271.98	52	0.33
2011	12	2	1724.6	18.5	864.97	148.51	11.18	0
2011	12	3	1466.26	14.5	596.05	103.42	12.1	0.1
2011	12	4	3150.39	53.82	1610.34	266.66	50.48	0.29
2011	12	5	886.62	9.32	478	83.97	9.17	0.05
2011	12	6	443.2	4.03	284.71	50.64	4.51	0
2011	12	7	568.11	2.14	33.33	6	0.18	0
2011	12	8	694.48	1.92	107.29	18.86	0.27	0
2011	12	9	369.44	2.53	135.21	24.25	1.96	0
2011	12	10	1916.74	6.24	257.19	45.91	5.47	0
2011	12	11	519.92	10.97	228.45	36.6	5.36	0
2011	12	12	980.06	27.06	855.58	119.07	26.83	0.15
2011	12	13	1482.91	13.7	510.8	89.19	15.43	0
2011	12	14	467.28	13.95	615.15	81.81	17.84	0
2011	12	15	522.9	2.51	47.57	8.81	0.02	0
2011	12	16	501.11	1.63	58.11	10.54	0.58	0
2011	12	17	303.55	0.83	46.76	8.79	0.03	0	19548.5	240.34	8371.73	1375.01	213.41	0.92
2012	1	1	13037.8	78.69	2308.04	387.25	56.97	0.28
2012	1	2	6699.7	27.2	1211.28	209.24	12.29	0
2012	1	3	5156.65	20.73	829.11	145.96	12.44	0.08
2012	1	4	11736.9	74.5	2264.46	379.95	55.29	0.24
2012	1	5	3181.1	13.76	669.03	119.49	9.37	0.04
2012	1	6	1669.12	6	395.42	71.47	4.47	0
2012	1	7	1874.83	3.31	44.93	8.15	0.19	0
2012	1	8	2399.28	2.71	139.53	24.63	0.28	0
2012	1	9	1277.16	4.22	195.61	35.65	1.97	0
2012	1	10	6599.8	8.6	367.79	66.72	6.02	0
2012	1	11	1662.8	15.12	315.21	50.49	6.04	0
2012	1	12	3512.73	36.14	1268.33	177.56	30.51	0.12
2012	1	13	5665.5	19.44	724.99	129.25	15.92	0
2012	1	14	1854.22	18.33	936.74	126.04	20.34	0
2012	1	15	1725.48	3.99	61.6	11.42	0.02	0
2012	1	16	1783.47	2.56	76.05	13.76	0.91	0
2012	1	17	1141.52	1.25	59.79	11.32	0.03	0	70978.1	336.55	11867.9	1968.35	233.06	0.76
2012	2	1	13091.1	163.53	8030.93	1388.93	138.92	0.24
2012	2	2	6620.8	45.26	4136.61	733.5	25.21	0
2012	2	3	5130.4	39.85	3060.22	550.44	22.54	0.06
2012	2	4	11987.3	154.18	7841.6	1354.5	135.46	0.2
2012	2	5	3281.79	27.76	2440.28	442.85	16.32	0.03
2012	2	6	1811.48	12.84	1439.2	264.09	7.62	0
2012	2	7	1837.33	7.67	192.09	35.87	0.49	0
2012	2	8	2336.37	5.92	581.93	104.33	0.73	0
2012	2	9	1397.77	9.3	703.54	128.3	3.33	0
2012	2	10	6692.9	19.51	1378.55	251.23	13.99	0
2012	2	11	1319.11	31.45	1085.36	180.41	23.9	0
2012	2	12	3158.94	69.09	3284.67	476.32	75.93	0.14
2012	2	13	5759.8	46.19	2844.02	520.45	37.26	0
2012	2	14	1838.41	31.68	2136.03	289.09	45	0
2012	2	15	1709.07	9.6	277.84	52.52	0.05	0
2012	2	16	1891.47	6.36	332.43	61.18	2.98	0
2012	2	17	1120.71	3.08	259.15	49.75	0.07	0	70984.8	683.27	40024.4	6883.76	549.8	0.67
2012	3	1	13984.9	21.78	557.61	95.62	15.08	0.06
2012	3	2	7146	7.72	284.22	49.54	3.25	0
2012	3	3	5708.2	5.32	211.13	37.73	3.51	0.02
2012	3	4	12839.3	20.49	545.72	93.35	14.6	0.05
2012	3	5	3583.64	3.05	168.39	30.5	2.61	0.01
2012	3	6	1855.29	1.13	99.94	18.44	1.23	0
2012	3	7	1758.04	1.08	12.23	2.45	0.07	0
2012	3	8	2395.61	0.9	38.95	6.94	0.1	0
2012	3	9	1535.53	0.75	47.18	8.6	0.59	0
2012	3	10	6518.7	1.87	86.29	15.63	1.82	0
2012	3	11	1419.98	5.47	88.65	15.3	2.01	0
2012	3	12	3485.48	10.62	344.11	49.2	10.15	0.05
2012	3	13	5760.8	4.8	173.01	31.89	4.52	0
2012	3	14	1928.03	4.38	251.75	33.75	6.77	0
2012	3	15	1618.86	1.24	20.26	3.99	0.01	0
2012	3	16	1756.57	0.7	22.03	4.15	0.21	0
2012	3	17	1137.25	0.4	18.66	3.74	0.01	0	74432.2	91.7	2970.13	500.82	66.54	0.19
2012	4	1	7318.3	36.72	653.21	107.94	22.24	0.16
2012	4	2	3753.74	13.14	346.53	58.56	5.1	0
2012	4	3	2867.65	8.32	217	38.14	4.59	0.05
2012	4	4	6693.2	34.69	636.42	104.62	21.54	0.14
2012	4	5	1832.99	4.24	164.69	29.61	3.38	0.02
2012	4	6	996.79	1.49	94.3	17.53	1.59	0
2012	4	7	1003.32	1.68	17.24	3.6	0.11	0
2012	4	8	1269.92	1.32	41.6	7.36	0.14	0
2012	4	9	784.05	0.94	45.22	8.19	0.76	0
2012	4	10	3454.39	3.12	113.07	20.35	2.86	0
2012	4	11	874.46	10.29	111.64	18.46	3	0
2012	4	12	1768.79	20.79	479.52	66.62	16.1	0.1
2012	4	13	3158.6	8.04	241.68	44.51	7.83	0
2012	4	14	871.71	9.23	364.23	48.21	11.02	0
2012	4	15	923.56	1.78	22.3	4.65	0.01	0
2012	4	16	975.25	0.99	23.57	4.53	0.28	0
2012	4	17	606.38	0.54	17.45	3.69	0.02	0	39153.1	157.32	3589.67	586.57	100.57	0.47
2012	5	1	3981.7	8.39	110.16	22.47	8.32	0.22
2012	5	2	1957.14	2.43	51.11	9.89	1.67	0
2012	5	3	1455.68	2.11	39.92	8.74	2.59	0.07
2012	5	4	3610.78	7.55	102.77	20.07	8	0.21
2012	5	5	889.46	1.12	28.86	6.42	2.01	0.04
2012	5	6	442.35	0.44	17.91	4.42	1.08	0
2012	5	7	524.97	0.74	7.63	2.51	0.11	0
2012	5	8	666.24	0.46	9.88	2.33	0.08	0
2012	5	9	362.78	0.25	6.61	1.36	0.48	0
2012	5	10	1715.58	0.9	14.66	3.36	1.18	0
2012	5	11	503.56	2.18	31.02	8	1.51	0
2012	5	12	920.48	3.3	50.46	10.39	3.3	0.04
2012	5	13	1545.87	2.82	39.66	10.57	3.01	0
2012	5	14	364.11	0.9	19.56	2.57	1.35	0
2012	5	15	485.53	0.86	14.06	4.02	0.02	0
2012	5	16	488.66	0.43	9.12	2.46	0.21	0
2012	5	17	317.15	0.29	8.39	2.77	0.02	0	20232	35.17	561.78	122.35	34.94	0.58
2012	6	1	1612.92	59.66	1113.83	253.85	53.24	0.75
2012	6	2	870.62	16.82	489.23	102	10.04	0
2012	6	3	555.64	15.26	412.16	98.74	14	0.23
2012	6	4	1517.73	54.09	1021.1	221.46	50.97	0.67
2012	6	5	311.48	8.62	294.2	71.7	10.4	0.13
2012	6	6	140.5	3.67	191.05	51.69	5.67	0
2012	6	7	203.12	4.76	94.46	33.22	0.85	0
2012	6	8	251.85	3.03	108.43	27.18	0.49	0
2012	6	9	116.43	1.72	64.45	14.17	1.78	0
2012	6	10	600.76	7.18	155.94	39.32	6.19	0
2012	6	11	383.87	16.71	331.45	95.22	11.85	0
2012	6	12	591.94	23.52	421.05	106.04	18.91	0.15
2012	6	13	558.07	27.95	646.32	182.68	32.87	0
2012	6	14	224.66	4.95	83.15	11.15	4.4	0
2012	6	15	206.56	5.15	173	50.99	0.15	0
2012	6	16	178.04	3.23	101.94	28.83	1.88	0
2012	6	17	119.04	1.86	99.1	34.6	0.12	0	8443.23	258.18	5800.86	1422.84	223.81	1.93
2012	7	1	336.56	292.4	10384.4	2134.88	339.39	2.04
2012	7	2	188.68	82.97	4957.89	956.3	66.11	0
2012	7	3	126.8	73.81	4015.6	850.51	67.04	0.57
2012	7	4	276.5	270.2	9831.1	1959.83	328.97	1.71
2012	7	5	69.66	46.41	3051.34	650.86	49.47	0.29
2012	7	6	41.5	21.4	1892.46	432.94	24.86	0
2012	7	7	160.34	18.89	563.22	178.36	2.84	0
2012	7	8	104.07	13.16	908.77	195.97	2.39	0
2012	7	9	42.61	12.64	794.62	155.62	9.82	0
2012	7	10	179.47	37.87	1731.44	369.17	39.2	0
2012	7	11	151.41	81.4	2585.94	612.15	85.13	0
2012	7	12	111.58	129.64	4393.79	857.31	159.08	0.94
2012	7	13	239.76	124.85	5874.78	1465.42	169.52	0
2012	7	14	5.83	36.32	1519.21	205.94	56.3	0
2012	7	15	215.55	20.54	1056.35	280.1	0.42	0
2012	7	16	92.33	15.24	722.59	178.34	12.29	0
2012	7	17	85.32	7.19	610.57	184.17	0.34	0	2427.97	1284.93	54894.1	11667.9	1413.17	5.55
2012	8	1	788.43	20.8	373.25	62.76	24.93	0.58
2012	8	2	339.73	6.57	197.04	33.78	5.58	0
2012	8	3	263.94	5.29	130.45	22.99	6.15	0.18
2012	8	4	597.65	19.18	362.07	60.39	24.18	0.52
2012	8	5	129.68	2.97	96.01	17.24	4.7	0.1
2012	8	6	71.04	1.26	54.9	10.24	2.4	0
2012	8	7	323.06	1.39	11.96	2.59	0.16	0
2012	8	8	186.71	1.12	29.41	5.28	0.18	0
2012	8	9	71.74	0.68	24.93	4.45	1.07	0
2012	8	10	292.15	2.96	66.95	11.89	3.84	0
2012	8	11	287.77	4.59	73.39	13.07	3.54	0
2012	8	12	357.86	9.43	207.02	30.54	14.17	0.25
2012	8	13	617.99	6.09	139.9	26.46	9.41	0
2012	8	14	57.17	4.19	132.26	17.5	9.02	0
2012	8	15	391.56	1.59	18.29	3.9	0.02	0
2012	8	16	151.03	0.9	17.88	3.49	0.39	0
2012	8	17	154.33	0.6	14.2	3.11	0.02	0	5081.84	89.61	1949.91	329.68	109.76	1.63
2012	9	1	185.3	45.91	1959.8	342.94	113.43	2.12
2012	9	2	69.78	11.11	1068.57	194.28	25.56	0
2012	9	3	61.64	9.09	755.64	135.69	29.81	0.64
2012	9	4	141.09	43.58	1916.88	335.53	110.25	1.9
2012	9	5	30.96	5.2	600.01	108.49	23.25	0.38
2012	9	6	20.09	1.27	353.68	64.65	11.56	0
2012	9	7	105.8	1.28	47.1	8.66	0.45	0
2012	9	8	48.54	1.14	160.22	29.29	0.77	0
2012	9	9	17.28	0.97	177.19	32.55	5	0
2012	9	10	83.74	4.75	348.36	63.15	15.45	0
2012	9	11	75.25	5.72	221.73	37.78	8.96	0
2012	9	12	109.52	13.31	581.05	84.47	37.88	0.7
2012	9	13	135.07	8.69	667.1	118.56	42.96	0
2012	9	14	24.53	6.07	354.71	46.81	24.42	0
2012	9	15	123.44	1.35	75.32	14.2	0.06	0
2012	9	16	45.07	1.2	90.48	16.8	1.64	0
2012	9	17	48.54	0.52	78.21	14.98	0.08	0	1325.64	161.16	9456.05	1648.83	451.53	5.74
2012	10	1	11950.3	24.72	889.2	148	56.61	1.09
2012	10	2	5823.78	5.64	487.08	85.78	11.6	0
2012	10	3	4541.41	5.14	334.41	57.78	15.38	0.33
2012	10	4	11013.5	23.18	869.4	144.69	55.02	0.99
2012	10	5	2979.94	2.75	270.95	47.36	11.96	0.18
2012	10	6	1475.48	0.71	161.32	28.69	5.83	0
2012	10	7	983.48	0.95	21.8	3.98	0.22	0
2012	10	8	1589.66	0.67	62.74	11.17	0.33	0
2012	10	9	1139.14	0.55	80.17	14.3	2.8	0
2012	10	10	4083.63	2.03	197.49	35.41	7.07	0
2012	10	11	378.73	3.84	110.07	18.05	4.74	0
2012	10	12	376.11	10.29	375.66	51.79	24.41	0.35
2012	10	13	4302.68	4.8	363.28	63.64	19.11	0
2012	10	14	15.6	5.31	263.83	34.13	16.58	0
2012	10	15	103.32	1.43	28.45	5.3	0.03	0
2012	10	16	69.71	0.82	34.39	6.23	0.67	0
2012	10	17	68.63	0.49	28.42	5.41	0.03	0	50895.1	93.32	4578.66	761.71	232.39	2.94
2012	11	1	692.94	167.75	7144.76	1217.37	149.95	0.63
2012	11	2	391.72	49.24	3718.84	651.15	29.34	0
2012	11	3	315.73	42.3	2679.69	473.76	30.06	0.19
2012	11	4	634.63	157.87	6974.86	1187.3	145.76	0.56
2012	11	5	176.35	28.36	2128.92	379.61	22.72	0.1
2012	11	6	85.91	12.35	1253.93	226.16	10.86	0
2012	11	7	221.04	8.01	173.05	31.77	0.73	0
2012	11	8	181.98	6.72	520.3	92.2	0.79	0
2012	11	9	102.7	8.94	609.3	109.43	4.85	0
2012	11	10	455.23	20.84	1234.14	222.01	15.44	0
2012	11	11	223.55	30.96	964.99	159.15	20.16	0
2012	11	12	390.22	73.89	2937.52	421.05	81.76	0.24
2012	11	13	507.03	46.45	2498.93	449.24	42.28	0
2012	11	14	163.52	36.25	1920.56	257.46	51.5	0
2012	11	15	279.48	9.19	240.41	45.06	0.06	0
2012	11	16	147.85	6.32	294.93	53.84	2.43	0
2012	11	17	118.18	3.23	226.36	43.01	0.08	0	5088.06	708.67	35521.5	6019.57	608.77	1.72
2012	12	1	5980.6	187.29	8020.62	1376.67	144.91	0.21
2012	12	2	2890.53	55.13	4169.13	735.66	26.22	0
2012	12	3	2338.57	48.11	3038.28	540.33	24.27	0.06
2012	12	4	5452.9	177.23	7818.72	1341.43	141.2	0.17
2012	12	5	1361.28	33.02	2419.42	433.78	17.65	0.03
2012	12	6	691.05	14.87	1421.84	257.27	8.1	0
2012	12	7	987.55	8.3	203.73	36.76	0.52	0
2012	12	8	1139.69	7.33	586.35	104.01	0.74	0
2012	12	9	579.86	11.24	706.95	127.53	3.73	0
2012	12	10	3054.23	24.37	1585.75	284.92	16.38	0
2012	12	11	1013.96	35.4	1019.93	166.91	21.84	0
2012	12	12	2198.85	89.51	3885.73	549.84	97.38	0.2
2012	12	13	2905.62	52.19	3179.72	572.87	44.45	0
2012	12	14	1116.09	46.36	2814.63	378.84	64.29	0
2012	12	15	1004.48	9.43	262.47	48.43	0.05	0
2012	12	16	908.35	7.16	336.5	60.93	2.88	0
2012	12	17	595.41	3.39	252.14	47.24	0.07	0	34219	810.33	41721.9	7063.42	614.68	0.67
2013	1	1	13162.4	9.16	181.13	28.17	7.91	0.1
2013	1	2	6158.6	3.02	96.66	15.88	1.72	0
2013	1	3	5076.9	2.06	54.49	9.07	1.86	0.03
2013	1	4	11723.3	8.75	177.27	27.56	7.67	0.08
2013	1	5	3053.08	1.08	41.26	7.08	1.44	0.01
2013	1	6	1464.49	0.42	23.64	4.13	0.71	0
2013	1	7	1729.84	0.3	4.04	0.69	0.04	0
2013	1	8	2152.48	0.21	7.65	1.3	0.04	0
2013	1	9	1233.32	0.24	12.46	2.24	0.34	0
2013	1	10	5873.5	1.54	75.14	13.03	1.91	0
2013	1	11	1344.5	2.34	30.52	4.41	0.91	0
2013	1	12	3336.91	11.33	603.22	80.49	18.06	0.11
2013	1	13	5197.4	2.14	134.08	23.57	4.64	0
2013	1	14	1797.23	7.93	574.27	76.95	14.67	0
2013	1	15	1580.2	0.3	2.67	0.47	0	0
2013	1	16	1571.2	0.16	3.85	0.68	0.07	0
2013	1	17	1014.6	0.08	2.26	0.43	0	0	67469.9	51.06	2024.61	296.15	61.99	0.33
2013	2	1	13202.2	177.17	7181.7	1242.47	119.96	0.22
2013	2	2	6631	55.48	3720.36	656.95	23.63	0
2013	2	3	5095.3	48.99	2680.66	481.16	21.88	0.06
2013	2	4	11974.6	166.44	7001	1209.04	116.58	0.18
2013	2	5	3225.52	34.32	2128.16	385.61	15.93	0.03
2013	2	6	1607.25	15.77	1247.51	229.21	7.41	0
2013	2	7	1910.11	9.02	183.33	34.97	0.48	0
2013	2	8	2282.6	7.33	513.56	92.06	0.65	0
2013	2	9	1349.11	11.95	617.76	112.39	3.27	0
2013	2	10	6360	23.52	1348.28	244.96	13.93	0
2013	2	11	1553.38	33.29	979.43	165.68	17.19	0
2013	2	12	3378.53	83.62	3658.6	524.14	81.4	0.16
2013	2	13	5853.9	54.04	2801.31	516.05	36.93	0
2013	2	14	1759.1	42.8	2625.92	354.16	54.06	0
2013	2	15	1823.83	10.48	250.87	48.41	0.05	0
2013	2	16	1808.11	7.39	299.23	55.49	2.67	0
2013	2	17	1169.23	3.66	224.25	43.94	0.07	0	70983.8	785.27	37461.9	6396.69	516.09	0.65
2013	3	1	15135.3	43.65	1830.87	314.48	38.5	0.09
2013	3	2	7570.7	14.02	947.04	166.23	8.29	0
2013	3	3	5620.2	11.04	685.26	122.45	8.44	0.02
2013	3	4	13943.7	41.26	1790.47	306.95	37.33	0.07
2013	3	5	3624.32	7.2	551.2	99.54	6.27	0.01
2013	3	6	2106.48	3.17	329.56	60.41	2.98	0
2013	3	7	1954.61	1.79	41.08	8.08	0.15	0
2013	3	8	2601.42	1.53	125.66	22.54	0.23	0
2013	3	9	1586.46	1.99	156.85	28.62	1.3	0
2013	3	10	6996.1	5.27	295.62	53.8	4.25	0
2013	3	11	1508.03	7.98	246.25	41.84	4.02	0
2013	3	12	3239.28	20.08	879.85	126.46	18.72	0.05
2013	3	13	6190.5	11.7	595.73	109.04	11.21	0
2013	3	14	1665.18	10.36	617.61	83.24	12.09	0
2013	3	15	1803.41	2.05	65.51	12.83	0.02	0
2013	3	16	1889.52	1.55	71.25	13.26	0.79	0
2013	3	17	1218.14	0.71	57.53	11.35	0.02	0	78653.4	185.35	9287.34	1581.12	154.61	0.24
2013	4	1	11071.1	172.16	6923.41	1263.66	147.28	0.44
2013	4	2	5636.1	51.43	3427.56	622.19	29.58	0
2013	4	3	4385.16	42.19	2669.61	508.85	28.96	0.12
2013	4	4	10196.8	163.01	6684.6	1204.85	142.83	0.37
2013	4	5	2888.5	27.6	2076.96	400.28	20.96	0.06
2013	4	6	1542.19	11.95	1198.64	241.38	9.63	0
2013	4	7	1585.58	6.98	243	60.95	0.83	0
2013	4	8	2027.91	5.63	554.36	106.33	0.98	0
2013	4	9	1268.87	8.09	617.85	115.2	4.54	0
2013	4	10	5533.03	19.47	1306.51	248.51	18.39	0
2013	4	11	1376.66	35.13	1234.6	245.01	19.71	0
2013	4	12	3893.38	75.88	3930.92	609.6	84.1	0.28
2013	4	13	4854.2	50.7	3080.31	636.94	54.81	0
2013	4	14	2423.34	33.66	2595.4	353.44	53.22	0
2013	4	15	1499.42	7.87	484.22	109.03	0.14	0
2013	4	16	1487.3	6.36	379.16	79.57	3.85	0
2013	4	17	955.2	2.56	261.92	64.64	0.11	0	62624.7	720.67	37669	6870.43	619.92	1.27
2013	5	1	8954.9	99.25	4325.29	913.69	130.31	0.64
2013	5	2	4515.07	27.85	2012.33	395.78	27.97	0
2013	5	3	3522.22	25.68	1664.63	360.29	28.95	0.18
2013	5	4	8144.8	92.43	4071.35	832.64	125.43	0.54
2013	5	5	2263.77	16.69	1249.05	271.94	21.18	0.09
2013	5	6	1176.5	7.67	766.8	179.74	10.59	0
2013	5	7	1332.05	5.28	257.7	82.65	1.37	0
2013	5	8	1687.81	3.26	392.06	86.91	1.05	0
2013	5	9	968.34	4.35	332.38	66.53	4.09	0
2013	5	10	4452.87	10.17	756.53	165.09	17.01	0
2013	5	11	1014.82	26.69	1078.96	264.09	27.65	0
2013	5	12	2063.14	44.38	2076.76	398.76	67.18	0.33
2013	5	13	4126.11	40.89	2466.43	638.4	70.67	0
2013	5	14	943.57	13.2	886.78	120.27	30.61	0
2013	5	15	1269.21	5.46	508.79	135.69	0.22	0
2013	5	16	1232.25	4.87	325.44	81.49	5.75	0
2013	5	17	796.56	1.8	271.37	84.58	0.17	0	48464	429.92	23442.6	5078.54	570.2	1.78
2013	6	1	4542.05	70.54	2446.89	659.42	79.84	0.79
2013	6	2	2146.48	19.6	1030.12	242.26	16.62	0
2013	6	3	1562.76	18.07	866.7	242.6	18.66	0.23
2013	6	4	4121.71	64.88	2169.58	555.54	75.98	0.69
2013	6	5	889.83	11.13	615.2	173.08	13.8	0.13
2013	6	6	417.08	5.18	445.76	132.3	7.77	0
2013	6	7	645.71	4.5	279.48	105.18	1.67	0
2013	6	8	701.74	2.91	238.74	69.48	0.75	0
2013	6	9	357.82	2.42	114.57	31.22	2.03	0
2013	6	10	1732.49	9.14	371.34	112.66	10.17	0
2013	6	11	762.57	21.25	861.65	259.32	23.88	0
2013	6	12	1205.15	30.7	1177.68	302.31	37.8	0.23
2013	6	13	1598.62	31.45	1941.53	617.85	66.21	0
2013	6	14	386.21	6.43	192.4	26.26	8.55	0
2013	6	15	625.24	4.09	547.06	165.87	0.28	0
2013	6	16	506.86	4.62	260.04	80.15	5.11	0
2013	6	17	345.84	1.56	267.22	98.52	0.19	0	22548.2	308.47	13826	3874.02	369.31	2.07
2013	7	1	1467.57	1.48	9.96	2.22	2.86	0.35
2013	7	2	697.17	0.36	3.18	0.67	0.65	0
2013	7	3	533.74	0.35	2.99	0.68	1.15	0.12
2013	7	4	1262.4	1.26	8.1	1.59	2.72	0.33
2013	7	5	311.01	0.15	1.42	0.36	0.9	0.07
2013	7	6	155.6	0.05	0.78	0.24	0.45	0
2013	7	7	254.88	0.2	1.92	0.65	0.08	0
2013	7	8	271.75	0.1	1.1	0.28	0.06	0
2013	7	9	126.32	0.04	0.27	0.08	0.32	0
2013	7	10	654.92	0.24	2.47	0.59	0.89	0
2013	7	11	173.86	0.46	3.98	0.86	0.64	0
2013	7	12	291.5	0.93	12.23	1.86	2.02	0.07
2013	7	13	620.66	0.58	9.29	2.85	2.12	0
2013	7	14	86.93	0.41	8.44	1.06	1.18	0
2013	7	15	256.74	0.23	3.41	0.9	0.02	0
2013	7	16	198.36	0.09	1.13	0.3	0.09	0
2013	7	17	146.06	0.07	0.88	0.3	0.01	0	7509.47	7	71.55	15.49	16.16	0.94
2013	8	1	778.53	14.85	216.66	35.54	16.54	0.65
2013	8	2	318.58	4.61	114.2	19.16	3.76	0
2013	8	3	259.79	3.57	73.38	12.6	4.19	0.21
2013	8	4	610.58	13.3	210.12	34.19	16	0.59
2013	8	5	132.18	1.76	52.87	9.28	3.15	0.11
2013	8	6	77.17	0.61	29.25	5.34	1.51	0
2013	8	7	207.7	1.4	7.08	1.49	0.14	0
2013	8	8	147.68	0.95	17.64	3.06	0.16	0
2013	8	9	62.22	0.38	13.28	2.33	0.81	0
2013	8	10	307.86	1.7	28.12	5	2.41	0
2013	8	11	104.44	3.75	46.3	8.04	2.55	0
2013	8	12	131.06	6.17	79.69	12.32	6.07	0.15
2013	8	13	491.48	4.56	62.21	12.13	5.59	0
2013	8	14	33.04	2.15	33.43	4.41	2.79	0
2013	8	15	215.14	1.79	11.74	2.39	0.02	0
2013	8	16	118.68	0.71	10.42	1.95	0.3	0
2013	8	17	109.2	0.58	8.22	1.76	0.02	0	4105.33	62.84	1014.61	170.99	66.01	1.71
2013	9	1	642.53	134.3	5581.79	986.65	192.64	1.85
2013	9	2	584.23	42.97	2936.16	530.42	42.57	0
2013	9	3	284.44	34.84	2159.02	388.16	46.79	0.55
2013	9	4	584.14	125.54	5445.43	962.52	186.87	1.63
2013	9	5	182.34	21.47	1703.26	308.26	35.21	0.29
2013	9	6	83.66	8.69	1000.46	182.73	16.67	0
2013	9	7	134.7	6.95	143.16	26.04	0.9	0
2013	9	8	163.63	6.77	452.55	81.72	1.3	0
2013	9	9	71.64	5.93	495.9	90.25	7.66	0
2013	9	10	460.75	21.73	1047.1	189.16	28.28	0
2013	9	11	15.61	21.37	753.3	128.52	18.75	0
2013	9	12	280.26	44.2	1616.14	244.2	63.79	0.73
2013	9	13	333.14	41.28	2136.48	383.46	79.16	0
2013	9	14	311.87	19.8	848.25	114.92	36.86	0
2013	9	15	138.55	7.04	230.45	42.38	0.1	0
2013	9	16	131.53	6.31	268.15	48.61	5.14	0
2013	9	17	78.29	3.14	210.95	39.65	0.14	0	4481.31	552.33	27028.5	4747.65	762.83	5.05
2013	10	1	98.87	45.99	2140	372.2	51.57	0.52
2013	10	2	43.88	13.41	1058.88	188.68	11.22	0
2013	10	3	36.05	11.66	866.6	154.69	12.09	0.15
2013	10	4	79.78	42.84	2076.7	361.05	49.93	0.46
2013	10	5	23.85	7.34	666.53	119.97	8.89	0.08
2013	10	6	12.38	3.06	358.51	65.42	3.86	0
2013	10	7	53.54	2.48	64.99	11.85	0.32	0
2013	10	8	28.15	1.87	193.28	34.73	0.4	0
2013	10	9	12.81	2.04	215.52	38.92	2.26	0
2013	10	10	67.08	6.53	455.44	81.46	9.11	0
2013	10	11	18.61	8.45	356.33	60.1	6.52	0
2013	10	12	15.43	17.8	794.88	118.3	25.02	0.33
2013	10	13	57.04	15.65	947.25	168.42	26.63	0
2013	10	14	32.59	7.77	429.75	57.74	15.26	0
2013	10	15	89.12	2.72	96.22	17.83	0.03	0
2013	10	16	89.96	2.03	116.79	21.08	1.53	0
2013	10	17	43.85	0.97	72.42	13.79	0.04	0	802.99	192.61	10910.1	1886.23	224.68	1.54
2013	11	1	286.8	10.87	137.29	20.97	11.84	0.29
2013	11	2	89.02	3.37	72.67	11.99	2.71	0
2013	11	3	102.32	2.53	46.17	7.52	3.14	0.09
2013	11	4	217.32	9.95	133.04	20.25	11.48	0.26
2013	11	5	50.29	1.39	33.37	5.58	2.41	0.05
2013	11	6	29.26	0.53	18.6	3.21	1.25	0
2013	11	7	149.46	0.78	4.58	0.84	0.07	0
2013	11	8	68.42	0.5	10.37	1.76	0.09	0
2013	11	9	30.78	0.3	8.48	1.46	0.54	0
2013	11	10	121.05	1.29	18.22	3	1.69	0
2013	11	11	80.48	2.44	30.45	4.78	1.6	0
2013	11	12	78.48	4.22	54.31	7.56	4.35	0.07
2013	11	13	226.47	3.05	42.14	7.17	3.6	0
2013	11	14	3.87	1.5	23.73	2.88	2.23	0
2013	11	15	182.66	0.95	7.21	1.32	0.01	0
2013	11	16	63.14	0.42	6.49	1.12	0.17	0
2013	11	17	62.52	0.29	5.09	0.98	0.01	0	1842.34	44.38	652.21	102.39	47.19	0.76
2013	12	1	631.01	64.94	2458.8	417.04	54.3	0.29
2013	12	2	182.81	20.33	1255.13	218.6	11.66	0
2013	12	3	206.92	16.94	926.64	162.86	12.4	0.09
2013	12	4	462.26	60.99	2396	406.08	52.66	0.26
2013	12	5	112.52	10.8	722.42	128.29	9.33	0.05
2013	12	6	56.19	4.7	413.41	74.47	4.4	0
2013	12	7	272.2	3.12	63.86	11.68	0.24	0
2013	12	8	124.5	2.62	188.08	33.34	0.35	0
2013	12	9	65.56	3.02	211.68	37.84	2.15	0
2013	12	10	264.29	8.74	443.45	78.71	7.35	0
2013	12	11	630.05	13.32	390.29	64.37	5.96	0
2013	12	12	822.68	29.08	1077.09	155.22	26.37	0.12
2013	12	13	691.79	19.35	920.93	163.49	19.22	0
2013	12	14	27.37	13.09	668.37	89.28	17.07	0
2013	12	15	385.86	3.66	92.3	17.17	0.03	0
2013	12	16	122.03	2.55	109	19.65	1.18	0
2013	12	17	121.43	1.21	78.19	14.86	0.04	0	5179.47	278.46	12415.6	2092.95	224.71	0.81
2014	1	1	4814.14	54.31	1587.8	258.83	55.6	0.34
2014	1	2	1998.04	17.01	837.67	141.78	11.92	0
2014	1	3	1881.33	13.55	556.74	95.28	13.13	0.1
2014	1	4	4157.39	51.29	1553.97	253.2	53.97	0.3
2014	1	5	1092.53	8.44	437.85	76.01	9.95	0.05
2014	1	6	511.19	3.58	257.43	45.37	4.81	0
2014	1	7	887.12	2.29	35.09	6.29	0.2	0
2014	1	8	862.13	1.86	103.66	18.06	0.32	0
2014	1	9	472.67	2.11	122.59	21.77	2.16	0
2014	1	10	2234.81	6.25	255.82	45.32	6.42	0
2014	1	11	1178.29	10.65	233.9	36.8	5.32	0
2014	1	12	1865.98	27.63	1047.54	144.89	32.01	0.13
2014	1	13	2256.28	13.56	514.48	89.9	16.88	0
2014	1	14	481.12	14.64	801.11	107.41	22.5	0
2014	1	15	926.46	2.75	45.58	8.38	0.02	0
2014	1	16	621.45	1.57	54.76	9.87	0.64	0
2014	1	17	426.19	0.83	42.01	7.9	0.03	0	26667.1	232.32	8488	1367.06	235.88	0.92
2014	2	1	7949.6	45.08	1688.95	283.61	51.07	0.29
2014	2	2	3781.34	13.07	873.22	152.62	10.53	0
2014	2	3	2976.54	11.37	645.14	112.44	12.44	0.08
2014	2	4	7142.3	42.53	1644.83	276.21	49.52	0.25
2014	2	5	1823.42	7.32	513.58	90.42	9.47	0.04
2014	2	6	869.21	3.11	309.45	55.21	4.62	0
2014	2	7	1121	1.83	45.5	8.13	0.2	0
2014	2	8	1299.9	1.63	125.67	22.27	0.29	0
2014	2	9	746.76	1.82	139.58	24.97	1.94	0
2014	2	10	3464.59	6.17	298.42	53.07	5.78	0
2014	2	11	1256.23	6.93	202.39	33.25	4.56	0
2014	2	12	6150.21	17.44	724.75	102.74	21.27	0.09
2014	2	13	3416.64	12.41	623.81	110.53	16.38	0
2014	2	14	4778.92	8.89	514.51	69.28	13.8	0
2014	2	15	1101.07	1.96	56	10.31	0.02	0
2014	2	16	927.91	1.45	71.91	13.04	0.64	0
2014	2	17	622.46	0.76	56.19	10.54	0.03	0	49428.1	183.77	8533.9	1428.64	202.56	0.75
2014	3	1	7182.8	81.01	2447.3	411.62	72.17	0.37
2014	3	2	3437.59	26.01	1300.21	224.34	15.98	0
2014	3	3	2754.44	19.94	885.58	155.12	15.79	0.11
2014	3	4	6428.9	76.42	2396.89	402.44	69.99	0.32
2014	3	5	1675.34	12.08	712.8	126.45	11.8	0.05
2014	3	6	794.21	5.09	440.62	79.48	5.72	0
2014	3	7	1046.2	3.61	52.55	10.15	0.28	0
2014	3	8	1218.49	2.73	158.41	27.84	0.4	0
2014	3	9	677.94	2.9	187.97	33.74	2.35	0
2014	3	10	3275	7.29	371.99	66.32	8.05	0
2014	3	11	985.02	18.26	332.54	55.39	7.41	0
2014	3	12	1714	37.91	1181.12	168.03	35.3	0.17
2014	3	13	2982.31	19.66	798.48	144.38	22.02	0
2014	3	14	654.22	16.8	832.39	111.54	23.11	0
2014	3	15	956.03	4.1	78.84	15.21	0.03	0
2014	3	16	882.46	2.4	87.78	16.12	1.13	0
2014	3	17	564.66	1.27	78.19	15.14	0.05	0	37229.6	337.48	12343.7	2063.31	291.58	1.02
2014	4	1	7178.9	25.93	522.32	87.05	22.21	0.24
2014	4	2	3339	8.65	268.94	45.65	4.69	0
2014	4	3	2737.78	6.23	189.31	33.27	5.42	0.07
2014	4	4	6388.8	24.36	508.61	84.17	21.53	0.21
2014	4	5	1608.82	3.44	146.86	26.25	4.09	0.04
2014	4	6	788.4	1.27	83.1	15.37	1.91	0
2014	4	7	982.44	1.3	14.24	3.13	0.11	0
2014	4	8	1208.82	0.98	36.96	6.59	0.14	0
2014	4	9	663.52	0.8	43.59	7.8	1	0
2014	4	10	3262.06	2.34	84.86	15.31	2.68	0
2014	4	11	859.94	6.49	93.55	16.15	2.89	0
2014	4	12	1413.19	13.68	331.35	47.11	14.04	0.11
2014	4	13	2753.35	6.07	183.42	34.14	7.42	0
2014	4	14	472.2	6.3	234.13	30.86	9.36	0
2014	4	15	888.72	1.38	21.99	4.63	0.02	0
2014	4	16	852.32	0.77	21.61	4.19	0.29	0
2014	4	17	564.82	0.45	15.68	3.39	0.02	0	35963.1	110.44	2800.52	465.06	97.82	0.67
2014	5	1	3186.01	36.69	815.85	161.21	38.04	0.52
2014	5	2	1572.63	10.74	373.55	70.11	7.61	0
2014	5	3	1207.36	9.51	323.08	66.63	9.71	0.15
2014	5	4	2837.81	33.75	769.76	147.4	36.66	0.45
2014	5	5	720.52	5.61	234.73	49.24	7.24	0.08
2014	5	6	365.41	2.39	129.45	30.28	3.5	0
2014	5	7	510.16	2.47	47.15	14.29	0.39	0
2014	5	8	592.04	1.69	81.36	17.1	0.34	0
2014	5	9	303.27	1.34	70.58	13.44	1.69	0
2014	5	10	1546.11	4.53	147.75	30.04	5.52	0
2014	5	11	357.76	9.43	209.44	49.88	7.1	0
2014	5	12	504.29	16.3	382.29	72.07	19.01	0.25
2014	5	13	1406.37	14.62	449.45	103.6	20.87	0
2014	5	14	148.69	5.65	168.03	22.18	9.5	0
2014	5	15	479.53	2.62	84.05	22.2	0.06	0
2014	5	16	425.07	1.62	63.19	15.27	0.95	0
2014	5	17	286.69	0.95	47.85	14.94	0.05	0	16449.7	159.91	4397.56	899.88	168.24	1.45
2014	6	1	1425.71	79.24	2964.46	624.78	83.67	0.84
2014	6	2	1217.17	23.2	1396.05	272.83	17.93	0
2014	6	3	461.22	21.45	1120.97	243.26	18.24	0.25
2014	6	4	1937.6	72.78	2795.88	569.54	80.85	0.73
2014	6	5	211.98	13.47	853.27	185.79	13.61	0.14
2014	6	6	97.49	6.2	545.86	127.28	6.93	0
2014	6	7	225.41	5.41	170.86	56.25	0.87	0
2014	6	8	264.29	3.74	252.81	56.84	0.65	0
2014	6	9	85.89	3.5	204.23	40.88	2.78	0
2014	6	10	491.97	10.83	466.39	103.27	10.94	0
2014	6	11	798.24	19.24	676.36	179.31	15.23	0
2014	6	12	1070.89	31.58	1088.87	234.06	35.37	0.37
2014	6	13	643.35	38.02	1870.78	476.24	51.57	0
2014	6	14	303.04	9.57	370.37	49.89	15.4	0
2014	6	15	220.16	5.61	305.08	84.87	0.12	0
2014	6	16	194.54	4.32	208.26	53.4	3.1	0
2014	6	17	128.07	2.14	197.06	61.71	0.11	0	9777.02	350.3	15487.6	3420.2	357.37	2.33
2014	7	1	339.68	7.52	59.91	13.45	7.86	0.47
2014	7	2	196.54	2.14	27.4	5.65	1.75	0
2014	7	3	118.42	1.95	19.95	4.72	2.35	0.16
2014	7	4	301.98	6.56	53.72	11.29	7.49	0.43
2014	7	5	57.21	1.03	12.39	3.04	1.77	0.11
2014	7	6	29.66	0.48	7.78	2.19	1.08	0
2014	7	7	70.33	0.88	6.49	2.25	0.17	0
2014	7	8	83.19	0.51	6.82	1.71	0.11	0
2014	7	9	26.23	0.21	2.51	0.59	0.37	0
2014	7	10	162.46	1.05	8.23	2.09	1.46	0
2014	7	11	40.85	2.14	21.88	6.2	1.81	0
2014	7	12	55.22	3.05	27.59	6.82	3.08	0.09
2014	7	13	147.4	3.81	34.87	9.89	5.15	0
2014	7	14	14.43	0.74	6.11	0.8	0.9	0
2014	7	15	72.88	1.01	12.83	3.69	0.03	0
2014	7	16	56.61	0.48	6.66	1.86	0.29	0
2014	7	17	43.37	0.35	6.13	2.19	0.02	0	1816.46	33.91	321.27	78.43	35.69	1.26
2014	8	1	173.57	65.37	1971.98	333.71	60.68	0.65
2014	8	2	95.42	22.57	1043.83	178.04	14.76	0
2014	8	3	57.24	16.86	696.78	121.37	12.25	0.19
2014	8	4	149.1	60.1	1925.25	324.94	58.83	0.53
2014	8	5	27.92	9.71	536.15	94.54	8.95	0.1
2014	8	6	16.72	3.97	314.96	56.47	4.27	0
2014	8	7	62.22	4.69	48.57	9.25	0.34	0
2014	8	8	43.87	3.68	142.01	24.61	0.42	0
2014	8	9	12.67	2.79	141.03	24.86	1.96	0
2014	8	10	69.54	8.49	313.05	55.29	8.26	0
2014	8	11	23.84	14.74	299.84	51.11	8.22	0
2014	8	12	19.37	27.5	711.54	106.56	27.86	0.41
2014	8	13	116.35	20.08	662.42	120.45	23.32	0
2014	8	14	2.91	11.39	406.03	55.14	16.25	0
2014	8	15	60.81	5.2	68.06	13.11	0.04	0
2014	8	16	33.07	3.12	79.64	14.55	1.45	0
2014	8	17	30.42	1.94	65.81	12.86	0.05	0	995.04	282.2	9426.95	1596.86	247.91	1.88
2014	9	1	24.83	26.88	807.03	139.85	58.51	1.32
2014	9	2	20.05	7.31	466.84	84.51	13.29	0
2014	9	3	8.41	5.43	289.68	51.45	15.61	0.41
2014	9	4	22.96	25.01	790.64	136.97	56.87	1.19
2014	9	5	3.97	3.03	232	41.61	12.24	0.22
2014	9	6	3.06	0.9	147.72	26.91	6.58	0
2014	9	7	6.78	1.36	18.56	3.5	0.26	0
2014	9	8	9.2	0.91	59.65	10.84	0.37	0
2014	9	9	2.57	0.69	57.05	10.29	2.74	0
2014	9	10	15.56	2.99	134.04	23.88	7.86	0
2014	9	11	4.04	3.76	96.6	16.68	4.7	0
2014	9	12	4.14	7.26	195.89	29.25	14.64	0.33
2014	9	13	11.66	7.58	275.64	48.28	22.55	0
2014	9	14	1.08	2.84	99.83	12.99	8.05	0
2014	9	15	7.09	1.6	31.59	6.02	0.04	0
2014	9	16	6.96	0.88	35.85	6.64	0.8	0
2014	9	17	5.16	0.55	35.1	6.79	0.05	0	157.52	98.98	3773.71	656.46	225.16	3.47
2014	10	1	29.18	8.01	75.37	11.84	10	0.49
2014	10	2	24.07	2.14	39.38	6.72	2.22	0
2014	10	3	11.15	2.11	28.96	4.75	3	0.16
2014	10	4	31.2	6.92	72.03	11.23	9.69	0.44
2014	10	5	9.37	1.2	21.12	3.52	2.32	0.08
2014	10	6	6.31	0.54	11.06	1.89	1.21	0
2014	10	7	3.58	1.02	3.66	0.7	0.1	0
2014	10	8	5.58	0.57	7.73	1.33	0.12	0
2014	10	9	4.59	0.31	6.54	1.12	0.53	0
2014	10	10	16.44	1.27	14.26	2.37	1.69	0
2014	10	11	6.83	1.52	16.81	2.85	1.39	0
2014	10	12	3.49	2.5	28.99	4.25	3.35	0.11
2014	10	13	20.34	3.24	30.82	5.27	4.03	0
2014	10	14	0.2	0.81	12.61	1.55	1.51	0
2014	10	15	6.62	1.26	6.28	1.17	0.02	0
2014	10	16	8.47	0.51	5.37	0.92	0.24	0
2014	10	17	3.46	0.42	3.85	0.75	0.02	0	190.88	34.35	384.84	62.23	41.44	1.28
2014	11	1	10.38	5.52	52.55	7.87	5.5	0.18
2014	11	2	11.88	1.67	29.06	4.79	1.32	0
2014	11	3	4	1.38	17.76	2.85	1.44	0.06
2014	11	4	9.83	4.94	51.03	7.6	5.31	0.16
2014	11	5	4.13	0.79	13.25	2.17	1.08	0.03
2014	11	6	3.79	0.32	7.8	1.34	0.5	0
2014	11	7	3.63	0.52	1.68	0.32	0.05	0
2014	11	8	3.02	0.32	3.89	0.66	0.06	0
2014	11	9	2.05	0.19	3.22	0.54	0.24	0
2014	11	10	7.54	0.73	7.66	1.26	0.66	0
2014	11	11	8.6	1.1	10.27	1.61	0.7	0
2014	11	12	21.23	1.92	20.09	2.74	1.92	0.04
2014	11	13	11.18	1.89	16.97	2.75	1.86	0
2014	11	14	24.99	0.71	9.95	1.21	0.94	0
2014	11	15	6.02	0.63	2.72	0.52	0.01	0
2014	11	16	3.68	0.27	2.51	0.44	0.09	0
2014	11	17	2.38	0.21	2.17	0.42	0.01	0	138.33	23.11	252.58	39.09	21.69	0.47
2014	12	1	132.01	135.4	4193.68	703.82	108.83	0.61
2014	12	2	48.58	42.38	2310.5	400.65	22.96	0
2014	12	3	43.81	33.67	1425.21	248.54	21.68	0.18
2014	12	4	103.05	126.26	4109.94	689.03	105.87	0.53
2014	12	5	25.87	20.96	1146.06	202.34	16.48	0.09
2014	12	6	10.89	9.39	743.65	133.27	8.52	0
2014	12	7	49.95	7.73	86.61	16.07	0.35	0
2014	12	8	27.33	6.13	248.13	43.39	0.5	0
2014	12	9	20.49	5.67	265.12	47.29	2.91	0
2014	12	10	67.51	16.99	637.74	113.3	10.48	0
2014	12	11	94.42	25.58	518.87	84.58	11.78	0
2014	12	12	66.08	57.52	1899.26	268.93	51.06	0.17
2014	12	13	166.2	38.18	1329.75	238.13	29.91	0
2014	12	14	4.06	28.1	1359.51	183.04	33.35	0
2014	12	15	81.75	8.54	115.77	21.73	0.04	0
2014	12	16	26.53	5.22	137.12	24.96	1.37	0
2014	12	17	25.36	3.12	138.17	26.24	0.07	0	993.89	570.84	20665.1	3445.31	426.16	1.58
2015	1	1	5945.96	138.74	5089.36	855.97	114.72	0.31
2015	1	2	2850.57	40.87	2673.18	464.05	23.21	0
2015	1	3	2307.25	34.94	1865.85	327.82	22.35	0.09
2015	1	4	5481.42	130.4	4980.16	836.94	111.55	0.26
2015	1	5	1404.54	22.89	1490.6	264.78	16.52	0.04
2015	1	6	677.62	10.39	898.7	161.64	7.8	0
2015	1	7	1166.56	6.76	112.16	20.51	0.38	0
2015	1	8	1168.2	5.49	346.01	60.97	0.59	0
2015	1	9	615.33	6.52	407.82	73.28	3.32	0
2015	1	10	3110.96	16.95	822.93	147.14	11.61	0
2015	1	11	1163.53	26.17	692.02	112.5	13.65	0
2015	1	12	1827.16	62.66	2369.28	335.56	59.64	0.18
2015	1	13	3030.67	38.16	1666.62	296.82	32.04	0
2015	1	14	747.3	31.38	1638.28	219.7	38.95	0
2015	1	15	1197.85	8.12	158.69	29.49	0.04	0
2015	1	16	836.03	5.2	191.03	34.56	1.96	0
2015	1	17	575.73	2.73	158.57	29.96	0.06	0	34106.7	588.37	25561.3	4271.69	458.39	0.88
2015	2	1	11652.2	9.22	206.47	32.91	7.49	0.07
2015	2	2	5407.6	2.99	112.44	18.8	1.63	0
2015	2	3	4477	2.18	67.02	11.32	1.85	0.02
2015	2	4	10526.9	8.69	201.62	32.12	7.26	0.07
2015	2	5	2707.73	1.24	51.48	8.88	1.42	0.01
2015	2	6	1303.38	0.51	27.93	4.92	0.66	0
2015	2	7	1545.94	0.42	4.99	0.87	0.04	0
2015	2	8	1941.16	0.3	12.23	2.1	0.05	0
2015	2	9	1095.88	0.3	16.19	2.89	0.38	0
2015	2	10	5285.1	1.17	45.98	8.13	1.16	0
2015	2	11	1119.5	2.1	29.9	4.42	0.8	0
2015	2	12	2467.61	6.47	208.84	27.82	6.35	0.03
2015	2	13	4627.4	2.38	90.74	15.9	2.7	0
2015	2	14	1219.58	3.92	177.94	23.52	4.71	0
2015	2	15	1380.34	0.41	4.55	0.81	0.01	0
2015	2	16	1374.28	0.23	6.65	1.17	0.08	0
2015	2	17	897.39	0.12	3.99	0.74	0.01	0	59029	42.65	1268.96	197.32	36.6	0.2
2015	3	1	11488.1	64.36	1925.92	327.87	50.99	0.23
2015	3	2	5836.59	20.44	938.71	162.92	10.49	0
2015	3	3	4181.86	17.6	771.55	136.89	11.94	0.07
2015	3	4	10550.9	59.96	1873.76	318.18	49.4	0.2
2015	3	5	2489.66	11.22	598.69	107.44	8.83	0.03
2015	3	6	1234.59	4.8	314.32	57.47	3.98	0
2015	3	7	1241.45	3.68	53.39	10.43	0.23	0
2015	3	8	1831.75	2.92	161.45	28.85	0.34	0
2015	3	9	946.41	3.2	201.81	36.49	2.06	0
2015	3	10	4904.94	7.73	361.39	65.18	6.51	0
2015	3	11	1003.84	13.99	340.89	58.14	6.8	0
2015	3	12	1890.15	28.93	945.22	138.37	25	0.09
2015	3	13	5254.72	18.73	765.69	139.98	17.15	0
2015	3	14	865.1	12.59	586.2	78.65	14.81	0
2015	3	15	1269.34	4.32	78.51	15.29	0.03	0
2015	3	16	1388.28	2.65	93.82	17.32	1.11	0
2015	3	17	899.48	1.52	56.41	11.36	0.03	0	57277.2	278.64	10067.7	1710.83	209.7	0.62
2015	4	1	7021.57	39.55	903.23	150.48	36.61	0.3
2015	4	2	3391.79	12.5	466.02	79.56	7.69	0
2015	4	3	2718.81	9.65	326.38	57.26	8.63	0.09
2015	4	4	6251.44	37.1	878.34	145.47	35.48	0.26
2015	4	5	1625.57	5.52	250.47	44.65	6.47	0.04
2015	4	6	796.84	2.22	138.12	25.36	2.98	0
2015	4	7	1006.63	1.98	25.95	5.46	0.18	0
2015	4	8	1235.46	1.4	65.49	11.72	0.22	0
2015	4	9	677.21	1.31	77.69	13.97	1.56	0
2015	4	10	3321.92	4.37	184.67	33.09	5	0
2015	4	11	871.39	9.54	158.92	27.02	4.64	0
2015	4	12	1581.68	23.21	739.14	103.44	26.19	0.16
2015	4	13	2931.13	10.53	383.89	70.84	13.65	0
2015	4	14	679.46	11.93	575.26	76.58	18.1	0
2015	4	15	887.68	2.11	32.91	6.85	0.02	0
2015	4	16	876.98	1.16	37.53	7.17	0.5	0
2015	4	17	560.63	0.67	25.08	5.36	0.02	0	36436.2	174.75	5269.09	864.28	167.94	0.85
2015	5	1	3943.22	24	538.42	96.89	25.59	0.32
2015	5	2	1904.56	7.02	262.4	46.66	5.14	0
2015	5	3	1493.68	6	208.17	39.22	6.63	0.1
2015	5	4	3605.83	22.17	516.33	90.97	24.74	0.29
2015	5	5	878.03	3.47	157.21	29.95	5.01	0.05
2015	5	6	434.27	1.37	86.94	17.7	2.34	0
2015	5	7	552.69	1.52	22.82	6.23	0.19	0
2015	5	8	691.5	0.99	46.38	9.08	0.2	0
2015	5	9	360.3	0.85	48.5	8.9	1.26	0
2015	5	10	1849.75	2.61	96.54	18.31	3.58	0
2015	5	11	388.95	5.92	114.8	23.72	3.94	0
2015	5	12	696.89	11.09	280.72	44.84	14.18	0.15
2015	5	13	1568.88	7.9	225.18	47.11	11.01	0
2015	5	14	274.76	4.31	163.77	21.29	8.48	0
2015	5	15	498.21	1.65	34.2	8.62	0.03	0
2015	5	16	493.97	0.9	30.78	6.82	0.46	0
2015	5	17	329.56	0.56	23.76	6.4	0.03	0	19965.1	102.33	2856.92	522.71	112.81	0.91
2015	6	1	1946.99	77.25	1903.68	459.8	75.02	0.87
2015	6	2	957.58	21.19	798.31	174.06	13.98	0
2015	6	3	605.64	19.74	716.47	178.08	20.09	0.27
2015	6	4	1835.92	70.62	1728.16	396.13	71.74	0.79
2015	6	5	313.96	11.45	501.81	126.8	15.12	0.15
2015	6	6	133.68	4.79	305.28	87.32	7.87	0
2015	6	7	239.19	5.44	177.91	64.86	1.22	0
2015	6	8	280.39	3.44	196.54	50.73	0.69	0
2015	6	9	112.73	2.5	128.76	28.6	3.09	0
2015	6	10	644.75	10.05	333.36	84.65	10.71	0
2015	6	11	437.25	21.9	583.43	173.11	16.47	0
2015	6	12	670.11	32.05	804.71	201.23	29.59	0.18
2015	6	13	584.08	35.81	1420.72	410.66	57.46	0
2015	6	14	220.04	7.34	208.36	28.01	9.1	0
2015	6	15	228.57	5.4	289.18	90.63	0.17	0
2015	6	16	194.58	3.86	178.78	52.44	2.55	0
2015	6	17	130.59	2	169.89	62.71	0.15	0	9536.05	334.83	10445.4	2669.82	335.02	2.26
2015	7	1	568.32	68.56	1940.06	407.35	71.59	1.12
2015	7	2	287.29	20.08	908.9	177.18	15.52	0
2015	7	3	201.19	17.67	738.79	161.27	17.59	0.34
2015	7	4	498.31	62.14	1829.3	370.76	68.99	1
2015	7	5	101.33	10.29	544.27	120.36	13.04	0.19
2015	7	6	50.96	4.6	332.35	80.83	6.76	0
2015	7	7	142.84	5.55	113.63	37.52	0.8	0
2015	7	8	122.88	3.6	180.68	40.29	0.65	0
2015	7	9	46.74	2.39	139.39	27.65	2.58	0
2015	7	10	244.34	9.16	315.26	69.12	9.6	0
2015	7	11	91.46	18.63	516.71	136.22	15.14	0
2015	7	12	129.45	29.07	802.96	174	30.87	0.31
2015	7	13	248.91	33.39	1144.7	292.05	44.96	0
2015	7	14	37.82	7.85	247.62	33.31	11.77	0
2015	7	15	152.62	6.02	194.78	55.98	0.12	0
2015	7	16	89.16	4	144.25	37.51	2.89	0
2015	7	17	74.84	2.2	133.4	44.26	0.12	0	3088.46	305.2	10227.1	2265.66	312.99	2.96
2015	8	1	974.45	19.33	395.87	66.6	26.24	0.69
2015	8	2	443.16	6.45	225.56	38.96	6.33	0
2015	8	3	334.49	4.8	131.91	22.8	6.1	0.21
2015	8	4	856.29	17.83	388.39	65.2	25.49	0.61
2015	8	5	181.35	2.66	105.79	18.51	4.69	0.14
2015	8	6	99.47	1.1	72.96	12.98	2.49	0
2015	8	7	220.03	1.3	8.33	1.6	0.14	0
2015	8	8	172.86	1.15	23.49	4.09	0.18	0
2015	8	9	79.4	0.55	20.13	3.54	0.85	0
2015	8	10	357.09	2.31	49.49	8.76	2.77	0
2015	8	11	87.02	3.74	45.71	7.69	2.48	0
2015	8	12	173.8	6.2	87.9	13.37	6.07	0.14
2015	8	13	540.76	4.57	98.33	17.83	7.15	0
2015	8	14	120.53	2.21	42.21	5.78	2.86	0
2015	8	15	222.86	1.47	11.54	2.24	0.02	0
2015	8	16	132.9	0.83	13.24	2.42	0.31	0
2015	8	17	115.11	0.6	16.8	3.18	0.03	0	5111.57	77.1	1737.65	295.55	94.2	1.79
2015	9	1	63.46	27.9	839.71	145.64	54.02	1.28
2015	9	2	31.24	7.65	418.56	75.52	11.32	0
2015	9	3	20.5	6.32	360.79	64.2	15.56	0.4
2015	9	4	48.5	25.9	812	140.85	52.4	1.17
2015	9	5	8.56	3.48	270.27	48.41	11.82	0.24
2015	9	6	5.18	1.01	137.11	24.93	4.85	0
2015	9	7	27.53	1.52	29.56	5.36	0.34	0
2015	9	8	19.39	1.1	92.61	16.83	0.52	0
2015	9	9	5.35	0.78	93.4	16.83	3.71	0
2015	9	10	37.55	3.71	202.26	36	10.47	0
2015	9	11	9.12	4.72	115.54	19.97	5.36	0
2015	9	12	24.39	9.04	233.83	34.97	17.33	0.39
2015	9	13	39.26	8.94	388.21	68.32	27.74	0
2015	9	14	18.16	3.6	118.22	15.35	9.96	0
2015	9	15	30.87	1.74	45.72	8.51	0.04	0
2015	9	16	13.96	1.06	54.47	9.94	1.15	0
2015	9	17	15.75	0.6	30.96	5.87	0.04	0	418.77	109.07	4243.22	737.5	226.63	3.48
2015	10	1	24.22	8.38	148.86	24.25	10.59	0.33
2015	10	2	15.98	2.37	80.11	13.92	2.35	0
2015	10	3	9.37	2.04	55.27	9.39	2.87	0.11
2015	10	4	20.54	7.57	144.39	23.48	10.25	0.3
2015	10	5	7.21	1.18	42.25	7.27	2.18	0.06
2015	10	6	4.12	0.47	24.81	4.37	1.07	0
2015	10	7	10.32	0.7	4.72	0.89	0.08	0
2015	10	8	8.12	0.44	12.47	2.2	0.1	0
2015	10	9	3.54	0.3	11.16	1.93	0.53	0
2015	10	10	15.64	1.16	26.92	4.6	1.65	0
2015	10	11	7.35	1.47	21.6	3.63	1.1	0
2015	10	12	6.33	2.65	42.83	6.17	3.42	0.11
2015	10	13	18.83	2.77	54.36	9.3	4.21	0
2015	10	14	0.84	1	21.44	2.67	1.88	0
2015	10	15	15.05	0.83	7.04	1.34	0.01	0
2015	10	16	9.55	0.39	7.59	1.36	0.18	0
2015	10	17	6.77	0.29	6.17	1.19	0.01	0	183.78	34.01	711.99	117.96	42.48	0.91
2015	11	1	119.96	150.82	5437.25	921.78	139.2	0.86
2015	11	2	46.4	47.64	2913.41	507.46	30.65	0
2015	11	3	51.95	39.3	1941.35	339.22	31.61	0.25
2015	11	4	92.35	140.03	5320.11	901.29	135.08	0.76
2015	11	5	27.45	24.66	1554.87	274.61	23.93	0.14
2015	11	6	12.81	11.03	983.82	176.09	12	0
2015	11	7	64.79	8.97	120.3	22.04	0.55	0
2015	11	8	32.76	7.21	357.43	62.76	0.79	0
2015	11	9	18.46	6.5	383.34	68.28	4.67	0
2015	11	10	54.45	20.78	845.85	149.88	16.3	0
2015	11	11	65.96	27.55	682.2	113.08	13.44	0
2015	11	12	59.38	59.65	2032.45	293.34	55.72	0.27
2015	11	13	121.09	46.86	1717.98	305.16	46.35	0
2015	11	14	1.3	27.42	1323.58	178.39	34.87	0
2015	11	15	93.1	10.45	169.7	31.57	0.06	0
2015	11	16	32.59	6.53	199.26	35.92	2.49	0
2015	11	17	29.64	3.8	188.33	35.48	0.09	0	924.44	639.2	26171.2	4416.35	547.8	2.28
2015	12	1	3963.29	153.76	7029.45	1196.18	162.83	0.58
2015	12	2	1845.29	42.79	3731.04	652.94	31.93	0
2015	12	3	1609.66	37.49	2601.35	458.13	29.34	0.16
2015	12	4	3516.96	145.58	6880.58	1170.59	158.63	0.49
2015	12	5	942.93	25.35	2106.67	374.1	21.89	0.08
2015	12	6	455.38	11.76	1321.27	236.74	10.86	0
2015	12	7	829.97	6.38	152.08	27.28	0.51	0
2015	12	8	823.55	5.24	470.39	82.68	0.76	0
2015	12	9	440.7	7.5	548.9	98.29	4.08	0
2015	12	10	2087.71	18.35	1135.55	202.57	15.67	0
2015	12	11	743.83	27.23	809.61	131.77	19.93	0
2015	12	12	1097.63	65.43	2686.57	382.81	76.17	0.29
2015	12	13	1898.98	39.47	2252.41	400.3	42.35	0
2015	12	14	361.15	33.01	1834.56	247.12	47.9	0
2015	12	15	779.68	6.95	216.12	39.4	0.06	0
2015	12	16	570.37	5.06	261.34	47.02	2.5	0
2015	12	17	398.64	2.43	239.1	44.32	0.09	0	22365.7	633.78	34277	5792.24	625.5	1.6
2016	1	1	11276.3	181.51	7250.2	1255.8	127.35	0.12
2016	1	2	5426.6	55.44	3364.8	592.24	27.05	0
2016	1	3	4382.1	54.33	3136.9	560.1	22.83	0.03
2016	1	4	10068.2	165.95	7021.9	1215.78	122.9	0.1
2016	1	5	2665.8	38.21	2411.43	433.15	16.71	0.02
2016	1	6	1385.58	17.17	1192.94	216.63	5.81	0
2016	1	7	1893.65	13.58	231.54	41.9	0.79	0
2016	1	8	2016.39	10.08	704.27	125.8	1.2	0
2016	1	9	1114.71	13.57	887.21	160.14	3.55	0
2016	1	10	5308.2	26	1616.85	292.05	13.31	0
2016	1	11	1493.75	34.89	1236.14	206.28	20.72	0
2016	1	12	2492.26	73.24	3122.14	459.58	69.32	0.11
2016	1	13	4845.7	62.32	3286.93	593.18	34.08	0
2016	1	14	1089.34	31.09	1821.24	246.48	40.27	0
2016	1	15	1766.37	16.03	330.75	61.02	0.06	0
2016	1	16	1452.56	9.8	421.55	76.25	3.31	0
2016	1	17	1044.72	5.6	214.94	40.52	0.06	0	59722.2	808.81	38251.7	6576.9	509.32	0.38
2016	2	1	15804.7	73.62	2707.79	453.33	62.03	0.25
2016	2	2	7400.2	22.02	1363.87	234.23	13.23	0
2016	2	3	6155.19	19.52	1015.15	177.48	13.12	0.07
2016	2	4	14188.8	68.83	2630.85	439.98	60.08	0.21
2016	2	5	3782.19	12.53	786.06	139.23	9.54	0.03
2016	2	6	1851.75	5.73	429.16	77.06	4.18	0
2016	2	7	2133.98	3.87	78.5	14.21	0.29	0
2016	2	8	2739.17	2.65	203.96	35.88	0.4	0
2016	2	9	1540.02	3.58	252.18	45.27	2.22	0
2016	2	10	7505.2	11.91	727.13	128.92	10.5	0
2016	2	11	1561.94	15.5	409.46	66.07	7.04	0
2016	2	12	3503.67	48.33	2562.95	355.64	55.63	0.2
2016	2	13	6344.8	26.28	1409.79	252.14	27.66	0
2016	2	14	1922.37	28.36	2135.12	289.16	40.92	0
2016	2	15	1872	4.44	88.96	16.52	0.03	0
2016	2	16	1942.76	2.73	115.13	20.68	1.35	0
2016	2	17	1235.81	1.36	70.25	13.32	0.03	0	81484.5	351.26	16986.3	2759.12	308.25	0.76
2016	3	1	16990.4	51.16	1395.39	235.74	37.03	0.22
2016	3	2	8151.5	17.76	744.45	128.92	8.25	0
2016	3	3	6494.46	12.48	506.14	89	8.1	0.06
2016	3	4	15407.6	48.4	1367.11	230.63	35.93	0.19
2016	3	5	4085.61	7.29	411.76	73.25	6.03	0.03
2016	3	6	2026.18	2.89	256.34	46.32	2.95	0
2016	3	7	2134.75	2.22	29.26	5.67	0.14	0
2016	3	8	2826.97	1.95	88.44	15.57	0.21	0
2016	3	9	1637.68	1.76	108.85	19.63	1.21	0
2016	3	10	7916.5	4.84	211.38	37.99	3.94	0
2016	3	11	1328.95	11.62	173.19	28.92	3.6	0
2016	3	12	3083.14	23.09	616.64	87.99	16.51	0.08
2016	3	13	6660.3	11.26	426.94	77.17	10.5	0
2016	3	14	1631.34	10.05	433.71	58.32	10.67	0
2016	3	15	1791.24	2.33	41.51	8.03	0.02	0
2016	3	16	1991.47	1.52	48.96	9.05	0.44	0
2016	3	17	1297.48	0.81	43.98	8.52	0.02	0	85455.6	211.43	6904.05	1160.72	145.55	0.58
2016	4	1	10795.7	18.1	522.13	89.95	17.28	0.09
2016	4	2	5274.3	5.82	289.3	50.56	4.03	0
2016	4	3	3924.27	4.35	174.42	31.35	3.75	0.03
2016	4	4	9844.8	17	511.43	87.58	16.73	0.08
2016	4	5	2549.42	2.5	142.31	25.9	2.86	0.01
2016	4	6	1305.45	1.09	98.51	18.32	1.52	0
2016	4	7	1356.2	0.89	11.1	2.57	0.08	0
2016	4	8	1790.16	0.62	28.26	5.13	0.1	0
2016	4	9	1089.53	0.54	28.23	5.16	0.52	0
2016	4	10	4861	1.61	69.23	12.62	1.93	0
2016	4	11	1008.83	4.27	62.74	11.69	1.7	0
2016	4	12	5708.93	8.11	279.36	40.9	10.43	0.08
2016	4	13	4162.59	4.36	153.05	29.63	5.29	0
2016	4	14	4637.87	3.14	215.42	29.37	7.32	0
2016	4	15	1137.96	0.95	15.78	3.5	0.01	0
2016	4	16	1194.89	0.52	16.02	3.23	0.19	0
2016	4	17	776.4	0.32	19.75	4.19	0.02	0	61418.3	74.19	2637.04	451.65	73.76	0.29
2016	5	1	4162.11	62.19	2512.54	489.54	59.96	0.44
2016	5	2	1982.92	18.5	1241.06	230.36	13.77	0
2016	5	3	1571.72	16.45	935.99	189.18	13.08	0.13
2016	5	4	3740.74	57.33	2404.08	457.59	57.91	0.38
2016	5	5	957.41	10.43	720.71	146.93	9.62	0.06
2016	5	6	474.12	4.79	447.71	96.96	4.78	0
2016	5	7	592.75	4.08	109.51	32.61	0.51	0
2016	5	8	734.76	2.61	198.11	40.87	0.46	0
2016	5	9	405.41	2.84	183.68	35.01	1.94	0
2016	5	10	2088.96	6.95	419.86	84.66	8.43	0
2016	5	11	370.54	15.31	474.35	116.76	10.09	0
2016	5	12	567.78	25.63	952.42	180.07	28.05	0.19
2016	5	13	1796.84	25.78	1277.19	301.96	31.92	0
2016	5	14	278.15	8.12	462.97	62.22	14.52	0
2016	5	15	549.45	4.45	168.16	45.2	0.06	0
2016	5	16	547.9	2.94	142.98	33.84	1.96	0
2016	5	17	367.48	1.57	133.76	38.73	0.07	0	21189	269.97	12785.1	2582.49	257.13	1.2
2016	6	1	1701.62	176.58	6138.09	1486.57	143.52	0.78
2016	6	2	845.84	47.06	2658.85	578.39	26.62	0
2016	6	3	606.69	43.62	2346.3	581.03	28.98	0.23
2016	6	4	1549.92	161.83	5610.39	1293.2	138.17	0.67
2016	6	5	339.55	27.07	1715.82	427.33	21.2	0.13
2016	6	6	154.06	12.38	1083.17	296.29	10.84	0
2016	6	7	253.74	12.66	531.05	195.29	2.02	0
2016	6	8	285.77	8	594.87	151.82	1.15	0
2016	6	9	132.06	7.33	436.6	96.89	4.05	0
2016	6	10	632.02	23.03	1122.2	282.74	18.95	0
2016	6	11	334.09	52.78	1698.12	493.61	43	0
2016	6	12	499.24	79.63	2677.05	624.31	81.63	0.44
2016	6	13	592.12	87.72	4753.98	1377.26	101.43	0
2016	6	14	184.87	20.13	838.14	112.99	30.06	0
2016	6	15	252.58	12.78	921	277.9	0.3	0
2016	6	16	196.91	10.57	547.75	157.24	7.22	0
2016	6	17	145.05	4.63	488.03	176.57	0.22	0	8706.13	787.8	34161.4	8609.43	659.36	2.25
2016	7	1	553.87	183.55	6399.87	1160.83	214.97	1.58
2016	7	2	273.08	56.82	3133.96	558.69	52.42	0
2016	7	3	215.39	46.65	2568.17	477.53	37.52	0.46
2016	7	4	454.99	167.01	6173	1104.9	209.33	1.35
2016	7	5	116.49	29.13	1971.64	368.9	27.7	0.25
2016	7	6	68.39	13.06	1109.94	216.17	12.88	0
2016	7	7	206.62	14.97	230.9	57.39	1.52	0
2016	7	8	151.43	9.78	565.86	106.02	1.36	0
2016	7	9	58.88	9.11	603.74	109.27	6.49	0
2016	7	10	298.26	24.61	1144.9	214.26	23.61	0
2016	7	11	127.1	43.87	1294.02	256.7	41.28	0
2016	7	12	150.3	74.91	2462.43	414.6	96.67	0.71
2016	7	13	303.62	68.38	2821.21	589.79	77.01	0
2016	7	14	35.03	23.74	1037.17	140.58	43.07	0
2016	7	15	240.59	16.72	393.59	89.67	0.15	0
2016	7	16	125.16	9.63	366.47	75.31	5.64	0
2016	7	17	104.87	5.86	270.19	65.05	0.15	0	3484.07	797.8	32547.1	6005.66	851.77	4.35
2016	8	1	853.97	99.3	3023.07	500.68	130.83	1.74
2016	8	2	605.22	31.42	1580.6	266.77	29.15	0
2016	8	3	331.77	25.35	1120.56	191.34	31.28	0.52
2016	8	4	720.4	92.22	2951	487.77	127.04	1.53
2016	8	5	251.73	14.95	868.44	149.81	23.79	0.29
2016	8	6	141.58	6.22	510.76	89.57	11.47	0
2016	8	7	455.87	5.9	75.65	14.04	0.55	0
2016	8	8	283.91	4.93	231.41	39.86	0.86	0
2016	8	9	135.99	3.73	238.06	41.11	5.19	0
2016	8	10	576.1	13.68	482.1	83.39	16.11	0
2016	8	11	178.76	20.71	484.34	81.03	14.98	0
2016	8	12	260.42	39.93	1061.26	157.37	48.51	0.63
2016	8	13	1198.43	28.81	992.96	174.34	44.93	0
2016	8	14	240.23	16.09	562.08	75.14	27.57	0
2016	8	15	507.79	6.59	118.13	21.97	0.07	0
2016	8	16	261.86	4.18	133.47	23.83	2.32	0
2016	8	17	256.71	2.47	108.55	20.46	0.09	0	7260.74	416.48	14542.4	2418.48	514.74	4.71
2016	9	1	8099.82	22.53	769.77	128.11	49.64	0.75
2016	9	2	3882.14	5.49	428.48	74.69	10.3	0
2016	9	3	3189.68	5.14	282.15	48.54	12.73	0.24
2016	9	4	7551.14	21	755.82	125.76	48.24	0.69
2016	9	5	2248.47	2.99	233.86	40.68	9.95	0.13
2016	9	6	1103.31	1.08	153.93	27.23	4.97	0
2016	9	7	716.07	1.07	15.61	2.88	0.17	0
2016	9	8	1007.26	0.88	48.9	8.55	0.26	0
2016	9	9	914.47	0.54	57	10.07	1.99	0
2016	9	10	2983.56	1.84	126.91	22.87	4.73	0
2016	9	11	290.71	3.05	88.26	14.59	4.36	0
2016	9	12	562.08	6.95	213.21	31.01	14.52	0.22
2016	9	13	2613.37	4.37	223.79	39.47	11.38	0
2016	9	14	278.88	3.29	122.99	16.44	8.4	0
2016	9	15	698.55	1.38	23.32	4.32	0.02	0
2016	9	16	821.13	0.65	29.74	5.39	0.51	0
2016	9	17	537.27	0.54	29.34	5.5	0.03	0	37497.9	82.79	3603.08	606.1	182.2	2.03
2016	10	1	851.19	105.1	4648.05	783.52	152.94	1.32
2016	10	2	413.63	30.58	2472.92	429.14	33.42	0
2016	10	3	345.17	24.97	1722.83	298.68	37.41	0.4
2016	10	4	778.1	98.75	4538.84	764.77	148.51	1.18
2016	10	5	253.03	15.55	1376.87	240.68	28.65	0.21
2016	10	6	114.44	6.18	833.83	147.48	14.19	0
2016	10	7	153.92	4.67	114.28	20.48	0.6	0
2016	10	8	126.67	3.67	336.55	58.97	0.88	0
2016	10	9	147.06	3.83	379	66.92	6.07	0
2016	10	10	668.45	13.07	859.64	151.63	19.54	0
2016	10	11	185.22	17.57	587.14	96.31	14.42	0
2016	10	12	173.3	48.28	2296.09	323.81	81.01	0.62
2016	10	13	523.52	30.14	1677.32	294.11	54.85	0
2016	10	14	12.09	26.12	1686.37	226.59	56.02	0
2016	10	15	165.45	5.19	149.8	27.38	0.07	0
2016	10	16	104.88	3.56	185.86	33.31	2.5	0
2016	10	17	88.47	1.89	152.41	28.38	0.09	0	5104.59	439.12	24017.8	3992.16	651.17	3.73
2016	11	1	12119	215.63	9701.3	1637.21	213.92	0.56
2016	11	2	5894.39	62.29	4944.57	856.46	41.82	0
2016	11	3	4970.45	53.99	3748.95	656.36	42.27	0.16
2016	11	4	10927	203.26	9465.2	1596.17	208.09	0.47
2016	11	5	2989.85	36.1	2967.18	523.92	31.26	0.08
2016	11	6	1449	15.97	1691.03	301.66	14.42	0
2016	11	7	1944.4	9.74	241.11	43.52	0.78	0
2016	11	8	2358.07	7.95	741.04	130.16	1.2	0
2016	11	9	1243.74	10.9	904.92	161.13	6.78	0
2016	11	10	6479.09	27.32	1798.82	319.42	23.85	0
2016	11	11	1381.46	39.59	1351.62	220.38	28.97	0
2016	11	12	2887.74	98.11	4766.31	678.99	115.6	0.25
2016	11	13	4941.55	61.11	3562.77	630.34	65.77	0
2016	11	14	1587.52	50.17	3337.92	451.3	73.34	0
2016	11	15	1652.02	11.19	341.22	62.69	0.08	0
2016	11	16	1614.16	7.98	419.22	75.2	4.17	0
2016	11	17	1035.31	3.84	298.4	55.71	0.11	0	65474.6	915.14	50281.6	8400.62	872.43	1.52
2016	12	1	25526.9	49.6	1483.17	244.62	38.94	0.22
2016	12	2	11758.7	16.86	796.9	135.86	8.52	0
2016	12	3	9872.9	12.67	524.91	90.47	8.66	0.06
2016	12	4	22918.5	47.13	1454.4	239.91	37.79	0.18
2016	12	5	6027.9	8.2	425.49	74.35	6.52	0.03
2016	12	6	2879.01	3.58	254.88	45.07	3.16	0
2016	12	7	3196.64	1.88	29.77	5.24	0.14	0
2016	12	8	4213.7	1.52	88.4	15.29	0.2	0
2016	12	9	2426.71	2.34	122.49	21.91	1.35	0
2016	12	10	11634.7	5.47	268.68	47.62	4.7	0
2016	12	11	1982.6	9.57	179.14	28.03	3.6	0
2016	12	12	4446.9	26.21	999.92	137.18	25.99	0.12
2016	12	13	9501.6	11.97	524.49	91.81	12.13	0
2016	12	14	2422.95	14.67	811.89	108.91	18.86	0
2016	12	15	2628.29	1.96	35.44	6.4	0.02	0
2016	12	16	2965.28	1.3	48	8.55	0.42	0
2016	12	17	1857.16	0.63	37.84	6.97	0.02	0	126260	215.56	8085.81	1308.19	171.02	0.61
2017	1	1	25278.7	82.05	2934.45	493.05	65.41	0.19
2017	1	2	12165.1	27.02	1479.77	254.75	13.91	0
2017	1	3	9780.5	22.02	1138.47	199.64	14.02	0.05
2017	1	4	23140.9	77.31	2868.82	481.97	63.41	0.16
2017	1	5	6177.1	14.87	905.12	160.45	10.24	0.03
2017	1	6	3110	6.47	496.76	88.94	4.6	0
2017	1	7	3157.06	3.75	67.17	12.04	0.25	0
2017	1	8	4240	3.01	217.25	38.22	0.42	0
2017	1	9	2485.92	4.77	294.6	53.09	2.32	0
2017	1	10	11883.1	9.83	529.76	94.78	7.9	0
2017	1	11	1984.51	15.18	431.99	69.71	7.74	0
2017	1	12	4282.69	36.53	1547.06	218.68	35.25	0.11
2017	1	13	10026.8	23.21	1036.03	182.71	20.25	0
2017	1	14	2242.73	18.29	1088.77	146.76	22.66	0
2017	1	15	2750.9	4.42	96.39	17.67	0.03	0
2017	1	16	3000.96	2.91	121.56	21.84	1.14	0
2017	1	17	1893.3	1.48	79.46	14.85	0.04	0	127600	353.12	15333.4	2549.15	269.59	0.54
2017	2	1	19526.2	202.87	9970.65	1694.93	168.82	0.2
2017	2	2	10124.3	56.29	5241.45	915.63	31.99	0
2017	2	3	7681.9	49.39	3733.05	658.65	27.49	0.05
2017	2	4	18041.6	190.63	9749.54	1655.86	164.52	0.16
2017	2	5	5113.4	34.48	3018.03	536.91	19.96	0.03
2017	2	6	2598.73	16.14	1844.01	331.3	9.5	0
2017	2	7	2650.03	10.1	224.46	40.99	0.56	0
2017	2	8	3545.49	7.27	680.86	119.67	0.82	0
2017	2	9	2107.59	11.44	830.08	148.55	3.84	0
2017	2	10	10004.7	23.7	1667.18	297.6	16.51	0
2017	2	11	1564.82	33.3	1165.6	192.33	19.83	0
2017	2	12	3406.8	83.29	4047.12	576.92	92.37	0.19
2017	2	13	8381.8	57.53	3412.98	613.35	43.57	0
2017	2	14	1817.34	42.97	2815.7	378.06	63.54	0
2017	2	15	2255.19	12.01	315.24	58.23	0.06	0
2017	2	16	2573.75	7.63	385.36	69.45	3.13	0
2017	2	17	1614.06	3.97	327.95	61.4	0.09	0	103008	843.01	49429.3	8349.83	666.6	0.63
2017	3	1	29887.6	62.53	2236.38	377.16	52.31	0.16
2017	3	2	15186.5	20.73	1180.48	203.36	11.87	0
2017	3	3	11736.2	15.84	810.79	142.49	10.46	0.04
2017	3	4	27690.2	58.54	2190.54	368.87	50.7	0.13
2017	3	5	7830.7	10.15	654.7	116.54	7.63	0.02
2017	3	6	3888.5	4.44	394.71	71.22	3.58	0
2017	3	7	3652	3.23	47.24	8.94	0.2	0
2017	3	8	5060.7	2.38	141.3	24.76	0.3	0
2017	3	9	3122.31	3.02	183.91	33.13	1.57	0
2017	3	10	14346.6	7.68	390.06	69.54	6.46	0
2017	3	11	2268.09	12.05	286.98	47.11	5.58	0
2017	3	12	4632.9	33.04	1447.14	201.62	37.81	0.16
2017	3	13	12740.2	17.15	770.06	138.34	15.75	0
2017	3	14	2275.45	18.22	1146.79	154	27.22	0
2017	3	15	3164.5	3.7	64.04	12.16	0.02	0
2017	3	16	3695.6	2.2	78.1	14.24	0.8	0
2017	3	17	2316.2	1.25	65.11	12.45	0.03	0	153494	276.15	12088.3	1995.93	232.29	0.51
2017	4	1	19313.7	107.09	3377.77	576.36	80.84	0.28
2017	4	2	10023.5	35.73	1732.38	297.38	17.87	0
2017	4	3	7714.2	26.5	1248.14	221.89	16.39	0.07
2017	4	4	17872	100.13	3291.51	557.65	78.26	0.22
2017	4	5	5189.47	16.14	988.45	177.74	11.93	0.03
2017	4	6	2623.67	6.72	587.99	108.66	5.63	0
2017	4	7	2494.35	5.74	88.31	19.83	0.37	0
2017	4	8	3322.86	4.04	235.37	42.12	0.49	0
2017	4	9	2112.05	4.44	277.52	49.49	2.4	0
2017	4	10	9401	10.48	532.34	95.69	9.04	0
2017	4	11	1539.16	25.11	522.79	94.47	10.13	0
2017	4	12	4068.08	49.09	1630.21	240.84	41.24	0.15
2017	4	13	7971.7	29.59	1178.25	223.89	25.45	0
2017	4	14	2555.66	20.19	1082.25	144.45	25.51	0
2017	4	15	2098.54	6.6	137.27	28.98	0.05	0
2017	4	16	2382.22	3.88	138.7	26.68	1.7	0
2017	4	17	1528.15	2.07	114.15	24.27	0.06	0	102210	453.54	17163.4	2930.39	327.36	0.75
2017	5	1	16937.4	27.22	925.07	163.26	29.19	0.15
2017	5	2	8053.9	8.6	484.64	84.53	6.4	0
2017	5	3	6702.1	6.73	329.1	60.7	6.4	0.04
2017	5	4	15501.4	25.48	899.87	156.68	28.25	0.13
2017	5	5	4207.21	4.17	264.55	49.32	4.78	0.02
2017	5	6	2085.26	1.87	171.97	33.19	2.44	0
2017	5	7	2166.79	1.4	25.9	6.9	0.16	0
2017	5	8	2839.33	0.94	57.96	10.85	0.18	0
2017	5	9	1744.69	1.07	62.96	11.42	0.91	0
2017	5	10	7808.4	2.68	129.18	24.05	3.14	0
2017	5	11	1381.82	6.11	136.56	27.8	3.5	0
2017	5	12	2304.56	13.86	452.23	68.99	15.59	0.09
2017	5	13	6769.9	7.77	310.77	64.33	8.99	0
2017	5	14	854.21	6.67	310.66	40.99	10.07	0
2017	5	15	1864.56	1.54	40.48	9.64	0.02	0
2017	5	16	2010.64	0.88	36.31	7.79	0.4	0
2017	5	17	1292.78	0.51	36.31	8.6	0.02	0	84525	117.5	4674.52	829.04	120.44	0.43
2017	6	1	7517.9	133.33	5137.97	1163.17	139.45	0.76
2017	6	2	3639.44	38.92	2395.85	488.06	30.96	0
2017	6	3	2678.22	35.37	1915.37	445.28	31.22	0.21
2017	6	4	6798	121.83	4795.85	1039.35	134.05	0.63
2017	6	5	1611.31	22.15	1459.28	338.09	22.99	0.11
2017	6	6	765.64	10.4	969.89	240.46	12.04	0
2017	6	7	945.35	9.71	346.65	125.61	1.74	0
2017	6	8	1152.13	6.33	433.64	106.49	1.1	0
2017	6	9	626.18	5.63	332.96	70.89	4.02	0
2017	6	10	3010.49	17.25	779.71	191.17	16.94	0
2017	6	11	954.31	34.12	1154.54	345.06	27.55	0
2017	6	12	1442.1	52.4	1726.48	420.76	52.44	0.28
2017	6	13	2658.8	67.48	3138.64	903.53	85.35	0
2017	6	14	478.97	13.67	514.87	69.73	18.06	0
2017	6	15	863.85	9.95	565.52	174.38	0.23	0
2017	6	16	802.14	7.95	369.56	104.91	6.34	0
2017	6	17	549.01	3.7	386.59	131.13	0.22	0	36493.8	590.19	26423.4	6358.07	584.7	1.99
2017	7	1	2022.23	282.29	11120.7	2407.21	290.55	1.61
2017	7	2	1087.52	82.65	5284.41	1040.06	65	0
2017	7	3	831.21	76.66	4113.34	916.8	63.93	0.46
2017	7	4	1700.44	258.69	10455.5	2174.99	279.92	1.37
2017	7	5	466.92	49.14	3135.04	700.26	47.05	0.23
2017	7	6	243.77	23.6	2063.53	493.09	24.57	0
2017	7	7	542.91	19.96	673.94	235.86	3.04	0
2017	7	8	470.08	12.97	917.9	212.56	2.24	0
2017	7	9	210.26	13.08	729.03	149.14	8.18	0
2017	7	10	1055.22	37.74	1795.88	405.76	36.54	0
2017	7	11	427.74	80.85	2715.33	688.18	71.13	0
2017	7	12	487.92	131.48	4927.99	987.44	148.85	0.68
2017	7	13	1139.43	133.14	6418.98	1724.37	162.41	0
2017	7	14	73.52	38.06	1871.17	252.98	59.49	0
2017	7	15	631.39	21.44	1335.07	371.13	0.49	0
2017	7	16	375.41	16.16	787.95	210.21	12.47	0
2017	7	17	281.15	7.33	711.44	230.35	0.38	0	12047.1	1285.24	59057.2	13200.4	1276.24	4.35
2017	8	1	3066.81	56.84	1471.74	236.67	77.72	1.13
2017	8	2	1379.82	17.94	704.1	114.88	15.96	0
2017	8	3	1128.39	15.16	609.98	101.01	19.31	0.33
2017	8	4	2617.73	52.67	1423.75	227.94	75.39	0.99
2017	8	5	679.18	8.9	452.79	75.57	14.35	0.18
2017	8	6	372.18	3.5	219.09	37.44	6.3	0
2017	8	7	906.93	3.53	50.12	9.35	0.41	0
2017	8	8	614.31	3.08	147.56	24.76	0.62	0
2017	8	9	310.79	2.51	161.98	26.89	3.8	0
2017	8	10	1389.65	8.57	320.96	53.35	12.05	0
2017	8	11	570.23	11.64	300.85	49.95	11.25	0
2017	8	12	940.54	23.87	677.29	99.03	38.22	0.54
2017	8	13	2361.26	17.39	647.44	110.39	31.68	0
2017	8	14	371.14	10.56	371.48	49.05	22.3	0
2017	8	15	828.08	3.78	77.14	14.27	0.05	0
2017	8	16	430.58	2.62	88.61	15.37	1.9	0
2017	8	17	396.52	1.55	48.69	9.41	0.05	0	18364.1	244.11	7773.57	1255.33	331.36	3.17
2017	9	1	2772.96	368.33	22767.6	3950.12	559.93	2.12
2017	9	2	1236.23	99.62	11912.3	2113.36	114.45	0
2017	9	3	1115.31	86.19	8701.91	1546.41	106.31	0.6
2017	9	4	2421.16	348.5	22188.5	3848.98	544.51	1.78
2017	9	5	640.75	58.04	6900.53	1233.92	78.62	0.29
2017	9	6	304.59	25.86	4008.6	722.37	36.28	0
2017	9	7	620.39	14.87	589.65	106.02	3.09	0
2017	9	8	578.88	12.97	1773.83	314.84	3.45	0
2017	9	9	323.44	17.2	2060.91	370.24	17.97	0
2017	9	10	1489.01	49.73	4426.72	795.14	72.01	0
2017	9	11	502.02	54.44	2562.88	424.96	64.65	0
2017	9	12	756.1	139.47	9241.74	1330.91	305.83	1.73
2017	9	13	1354.74	100.29	8628.82	1551.24	193.83	0
2017	9	14	372.31	69.03	6560.31	896.09	202.21	0
2017	9	15	673.01	15.6	799.64	146.67	0.23	0
2017	9	16	414.56	13.89	995.65	180.09	12.32	0
2017	9	17	334.22	6.13	785.45	146.59	0.33	0	15909.7	1480.16	114905	19678	2316.02	6.52
2017	10	1	42486.1	160.34	8033.66	1362.07	237.68	1.08
2017	10	2	20619.3	46.96	4258.53	738.73	51.36	0
2017	10	3	15962	41.65	2960.38	517.53	51.32	0.3
2017	10	4	38842.6	151.89	7868.76	1333.99	230.64	0.91
2017	10	5	9855.25	28.7	2396.64	422.87	38.2	0.16
2017	10	6	4834.81	12.49	1460.9	260.37	18.2	0
2017	10	7	4605.79	5.98	170.09	30.55	0.79	0
2017	10	8	6566.81	4.66	535.66	93.6	1.31	0
2017	10	9	3745.9	8.43	663.38	118.41	7.71	0
2017	10	10	18771.4	15.29	1346.17	239.72	25.71	0
2017	10	11	2064.84	26.96	946.67	154.83	22.08	0
2017	10	12	2668.27	69.25	3508.29	499.22	110.45	0.55
2017	10	13	16584	39.05	2655.49	470.61	69.03	0
2017	10	14	648.47	35.43	2513.04	340.51	73.68	0
2017	10	15	3966.88	7.14	238.64	43.67	0.09	0
2017	10	16	4881.83	4.69	305.24	54.82	3.91	0
2017	10	17	3119.8	2.29	256.36	47.57	0.14	0	200224	661.2	40117.9	6729.07	942.3	3
2017	11	1	21657.7	77.43	2642.31	441.82	58.89	0.2
2017	11	2	10509.5	26.54	1381.86	236.29	13.05	0
2017	11	3	8351	21.44	972.09	168.71	12.07	0.05
2017	11	4	19589	73.05	2588.91	432.61	57.08	0.16
2017	11	5	5420.94	14.63	783.62	137.57	8.83	0.03
2017	11	6	2674	6.48	467.63	82.97	4.15	0
2017	11	7	2952.43	3.55	55.27	9.9	0.22	0
2017	11	8	3733.91	2.95	171.42	29.69	0.33	0
2017	11	9	2197.4	4.9	224.49	39.92	1.84	0
2017	11	10	10510	9.19	440.28	77.58	6.91	0
2017	11	11	1875.01	14.54	345.99	55.81	6.45	0
2017	11	12	3668.48	36.23	1380.49	194.09	35.71	0.16
2017	11	13	9052.2	21.24	876.18	154.31	17.65	0
2017	11	14	1696.19	18.79	1017.42	137.11	24.44	0
2017	11	15	2561.43	4.12	76.84	14.04	0.03	0
2017	11	16	2701.11	2.85	95.24	16.92	1.08	0
2017	11	17	1717.64	1.42	78.05	14.44	0.03	0	110868	339.35	13598.1	2243.78	248.76	0.6
2017	12	1	30890.5	168.16	5399.96	902.31	105.34	0.22
2017	12	2	16119.1	55.08	2699.49	462.78	20.56	0
2017	12	3	12516.4	46.05	2102.88	367.04	18.78	0.06
2017	12	4	28638	158.97	5259.13	878.09	102.31	0.17
2017	12	5	8143.3	32.04	1642.76	289.69	13.39	0.03
2017	12	6	4227.7	14.16	882.48	157.3	5.77	0
2017	12	7	4171.12	7.72	142.41	25.46	0.45	0
2017	12	8	5505.2	6.35	422.37	73.69	0.65	0
2017	12	9	3282.44	11.63	543.95	96.81	3.08	0
2017	12	10	15150.8	20.69	1116.25	197.05	13.87	0
2017	12	11	2745.03	32.09	815.11	131.48	14.45	0
2017	12	12	5653.3	77.16	3134.15	442.39	69.29	0.19
2017	12	13	13330.2	47.6	2213.79	391.7	34.02	0
2017	12	14	2761.4	39.15	2275.22	307.11	46.43	0
2017	12	15	3665.24	8.77	191.4	34.96	0.05	0
2017	12	16	3971.01	6.37	242.7	43.1	2.4	0
2017	12	17	2495.35	2.96	150.06	27.85	0.05	0	163266	734.95	29234.1	4828.81	450.89	0.67
2018	1	1	36272.5	72.13	2959.39	500.18	53.99	0.17
2018	1	2	17967.3	24.45	1568.42	270.47	12.27	0
2018	1	3	14321.4	19.48	1064.17	186.26	10.61	0.05
2018	1	4	33689.1	67.76	2896.83	489.45	52.31	0.14
2018	1	5	9232.7	13.22	858.04	151.88	7.71	0.02
2018	1	6	4615.12	5.93	523.49	93.69	3.69	0
2018	1	7	4337.7	3.54	63.26	11.46	0.21	0
2018	1	8	5952.3	2.81	189.02	32.91	0.32	0
2018	1	9	3953.4	4.33	233.8	41.89	1.51	0
2018	1	10	16429.1	8.75	479.3	85.32	6.28	0
2018	1	11	2764.97	13.17	361.72	58.74	5.61	0
2018	1	12	7703.3	31.2	1359.17	193.3	27.5	0.09
2018	1	13	14549.6	20.34	957.46	170.72	15.67	0
2018	1	14	4749.6	15.46	976.42	132.69	18.14	0
2018	1	15	3817.27	4.07	85.38	15.72	0.03	0
2018	1	16	4288.7	2.79	104.4	18.66	1.12	0
2018	1	17	2678.96	1.4	89.02	16.61	0.03	0	187323	310.83	14769.3	2469.95	217	0.47
2018	2	1	30608.5	13.54	360.95	58.51	10.05	0.06
2018	2	2	15536.9	4.58	180.43	29.98	2.23	0
2018	2	3	11565.8	3.13	130.65	22.52	2.16	0.02
2018	2	4	28476.5	12.66	353.13	57.17	9.73	0.05
2018	2	5	7690.7	1.75	102.19	17.96	1.59	0.01
2018	2	6	3872.7	0.66	53.45	9.53	0.68	0
2018	2	7	3395.85	0.74	8.04	1.47	0.05	0
2018	2	8	4602	0.49	22.36	3.85	0.07	0
2018	2	9	3325.8	0.49	35.59	6.41	0.42	0
2018	2	10	13144.4	1.73	83.94	14.75	1.72	0
2018	2	11	2121.61	3.23	64.85	10.04	1.52	0
2018	2	12	6170.7	10.56	478.35	64.88	13.14	0.06
2018	2	13	11666.5	3.52	158.74	28.01	3.78	0
2018	2	14	3926.5	6.49	410.91	54.99	9.87	0
2018	2	15	2887.48	0.82	10.58	1.96	0.01	0
2018	2	16	3329.74	0.41	12.24	2.19	0.13	0
2018	2	17	2093.63	0.25	7.54	1.43	0.01	0	154415	65.05	2473.94	385.65	57.16	0.2
2018	3	1	24445.6	49.4	1611.84	273.16	31.21	0.1
2018	3	2	12992.7	16.83	770.62	132.22	6.43	0
2018	3	3	8860.4	13.52	650.07	114.44	6.75	0.03
2018	3	4	22754.8	46.22	1560.68	263.49	30.15	0.08
2018	3	5	6266.2	8.71	495.64	88.22	4.8	0.01
2018	3	6	3119.88	3.65	246.47	44.82	1.97	0
2018	3	7	2565.47	2.68	51.96	10.08	0.19	0
2018	3	8	3531.75	2.17	142.86	25.26	0.24	0
2018	3	9	2699.89	2.88	178.08	31.72	1.23	0
2018	3	10	10113.2	6.85	367.98	65.21	5.15	0
2018	3	11	1665.83	10.7	288.37	48.4	4.64	0
2018	3	12	3376.84	25.74	1057.75	150.91	22.6	0.07
2018	3	13	9220.4	15.52	762.47	137.94	13.07	0
2018	3	14	1576.49	12.91	752.85	101.16	14.85	0
2018	3	15	2244.6	2.99	76.6	14.86	0.02	0
2018	3	16	2581.05	2.1	85.73	15.63	0.88	0
2018	3	17	1631.31	1.04	44.85	8.97	0.02	0	119646	223.91	9144.82	1526.49	144.2	0.29
2018	4	1	18898.5	51.68	1522.06	268.74	34.13	0.14
2018	4	2	9940.4	18.05	842.4	147.76	7.79	0
2018	4	3	7116.2	13.1	496.94	92.23	6.78	0.04
2018	4	4	17467.9	48.76	1486.5	259.52	33.01	0.11
2018	4	5	4761.7	8.09	407.2	76.35	5.04	0.02
2018	4	6	2341.88	3.47	284.99	54.94	2.62	0
2018	4	7	2143.92	2.38	36.28	9.74	0.17	0
2018	4	8	2888.94	1.96	78.55	14.87	0.19	0
2018	4	9	2057.6	2.24	79.12	14.63	0.88	0
2018	4	10	8057	4.85	169.8	32.23	3.25	0
2018	4	11	1391.48	11.9	192.54	39.33	3.92	0
2018	4	12	2684.49	23.94	635.26	97.92	17.26	0.09
2018	4	13	7153	13	447.96	93.49	10.11	0
2018	4	14	1242.35	10.46	432.31	57.82	11.04	0
2018	4	15	1869.54	2.52	70.94	16.62	0.03	0
2018	4	16	2078.39	1.78	51.89	11.3	0.63	0
2018	4	17	1310.44	0.87	59.11	13.82	0.03	0	93403.7	219.05	7293.85	1301.31	136.88	0.4
2018	5	1	9523.4	0.53	3.48	1.04	2.01	0.13
2018	5	2	4555.04	0.12	0.93	0.28	0.41	0
2018	5	3	3547.58	0.15	1.4	0.43	0.99	0.04
2018	5	4	8629.4	0.44	2.77	0.8	1.91	0.13
2018	5	5	2225.5	0.08	0.85	0.29	0.8	0.02
2018	5	6	1088.73	0.04	0.7	0.24	0.38	0
2018	5	7	1106.64	0.08	0.72	0.25	0.05	0
2018	5	8	1484.57	0.04	0.52	0.15	0.04	0
2018	5	9	901.07	0.02	0.14	0.05	0.28	0
2018	5	10	4076.86	0.09	0.71	0.21	0.62	0
2018	5	11	596.06	0.15	1.71	0.52	0.35	0
2018	5	12	1181.67	0.25	4.3	0.84	0.83	0.02
2018	5	13	3432.61	0.31	2.94	0.93	1.14	0
2018	5	14	509.92	0.08	2.66	0.34	0.38	0
2018	5	15	951.61	0.09	1.63	0.44	0.01	0
2018	5	16	1045.12	0.04	0.7	0.2	0.05	0
2018	5	17	671.24	0.03	0.63	0.23	0.01	0	45527	2.54	26.79	7.24	10.26	0.34
2018	6	1	3292.1	10.64	112.64	36.78	11.89	0.55
2018	6	2	1588.74	2.3	32.07	10.36	1.95	0
2018	6	3	1186.54	2.68	43.38	14.44	3.69	0.17
2018	6	4	2950.8	9.29	87.79	27.29	11.15	0.5
2018	6	5	699.74	1.46	25.68	9.27	2.69	0.1
2018	6	6	348.12	0.54	19.61	7.68	1.46	0
2018	6	7	421.17	1.15	25.37	9.75	0.41	0
2018	6	8	542.38	0.61	17.86	5.66	0.22	0
2018	6	9	281.44	0.3	4.52	1.65	0.52	0
2018	6	10	1404.77	1.75	17.74	6.37	2.25	0
2018	6	11	262.68	2.94	47.39	16.49	3.71	0
2018	6	12	462.88	3.84	50.7	16.59	4.89	0.1
2018	6	13	1195.72	5.36	87.45	32.29	9.89	0
2018	6	14	200.18	0.52	4.31	0.61	0.58	0
2018	6	15	388.83	1.15	54.9	16.28	0.08	0
2018	6	16	381.54	0.8	23.02	7.26	0.81	0
2018	6	17	249.62	0.4	20.78	8.29	0.06	0	15857.3	45.73	675.21	227.06	56.25	1.42
2018	7	1	1008.43	118.99	4047.25	689.02	121	0.91
2018	7	2	529.78	37.87	2119.35	362.61	23.34	0
2018	7	3	367.7	31.06	1512.14	264.56	20.33	0.27
2018	7	4	916.94	108.9	3952.15	670.46	117.86	0.79
2018	7	5	220.5	19.58	1199.63	211.64	15.09	0.15
2018	7	6	110.89	8.55	719.82	128.71	7.45	0
2018	7	7	135.38	9.25	97.52	19.33	0.79	0
2018	7	8	187.43	6.43	288.1	50.22	0.7	0
2018	7	9	91.74	6.52	326.83	57.69	3.15	0
2018	7	10	461.57	14.14	602.6	107.51	11.52	0
2018	7	11	66.74	25.21	583.84	101.14	20.12	0
2018	7	12	123.06	45.24	1351.97	205.47	54.76	0.28
2018	7	13	375.55	37.61	1302.28	240.44	32.05	0
2018	7	14	56	17.09	746.39	102.13	27.88	0
2018	7	15	122.47	9.96	145.28	28.59	0.07	0
2018	7	16	130.88	5.77	166.8	30.87	2.52	0
2018	7	17	87.01	3.53	141	27.84	0.08	0	4992.07	505.7	19302.9	3298.23	458.71	2.4
2018	8	1	528.4	28.97	436.1	71.52	31.57	0.94
2018	8	2	232	9.28	215.11	35.71	7.17	0
2018	8	3	181.34	6.95	157.99	27.12	7.33	0.28
2018	8	4	434.84	26.51	421.06	68.63	30.59	0.81
2018	8	5	102.72	3.28	108.6	19.05	5.3	0.15
2018	8	6	60.84	1.11	51.46	9.39	2.34	0
2018	8	7	142.29	2.21	16.01	3.14	0.25	0
2018	8	8	109.5	1.56	40	6.95	0.28	0
2018	8	9	42.34	0.76	33.37	5.81	1.5	0
2018	8	10	209.13	3.97	97.68	16.85	6.72	0
2018	8	11	66.95	8.33	121.66	20.46	6.05	0
2018	8	12	50.69	17.35	385.85	55.76	28.6	0.87
2018	8	13	341.08	9.35	220.6	39.5	18.76	0
2018	8	14	11.12	8.03	267.57	36.09	19.41	0
2018	8	15	164.75	2.55	22.68	4.49	0.03	0
2018	8	16	88.43	1.24	25.52	4.69	0.6	0
2018	8	17	80.86	0.88	13.92	2.99	0.03	0	2847.28	132.33	2635.18	428.15	166.53	3.05
2018	9	1	94.85	43.92	2219.49	388.4	110.28	2.21
2018	9	2	61.53	12.22	1175.86	210.86	24.78	0
2018	9	3	32.24	8.76	865.2	153.57	29.58	0.67
2018	9	4	86.61	41.34	2158.36	377.75	107.01	1.99
2018	9	5	20.15	4.98	678.87	121.09	23.16	0.4
2018	9	6	11.73	1.25	399.3	71.94	11.26	0
2018	9	7	19.46	1.69	64.54	11.61	0.63	0
2018	9	8	24.12	1.23	188.8	33.84	0.81	0
2018	9	9	9.6	1.06	193.82	34.66	5.47	0
2018	9	10	48.52	4.07	422.14	75.18	15.88	0
2018	9	11	11.8	6.88	334.98	56.48	11.14	0
2018	9	12	15.66	13.63	662.22	100.11	34.04	0.46
2018	9	13	43.43	11.16	943.57	165.81	51.31	0
2018	9	14	4.58	5.43	323.63	43.7	18.55	0
2018	9	15	22.29	1.84	102.6	18.69	0.07	0
2018	9	16	17.77	1.3	121.55	22.01	2	0
2018	9	17	15.55	0.65	94.31	17.67	0.09	0	539.89	161.41	10949.2	1903.37	446.06	5.73
2018	10	1	1265	6.78	93.19	14.84	7.76	0.35
2018	10	2	423.23	1.77	45.88	7.76	1.6	0
2018	10	3	602.47	1.63	35.53	5.91	2.39	0.11
2018	10	4	1077.31	5.84	89.1	14.09	7.47	0.33
2018	10	5	363.64	0.8	26.41	4.47	1.83	0.06
2018	10	6	170.55	0.3	14.37	2.52	0.85	0
2018	10	7	241.32	0.85	4.3	0.82	0.09	0
2018	10	8	256.46	0.47	8.19	1.41	0.09	0
2018	10	9	135.85	0.17	7.63	1.3	0.5	0
2018	10	10	726.57	0.54	24.35	4.25	1.31	0
2018	10	11	99.81	1.46	21.77	3.62	1.12	0
2018	10	12	554.63	1.95	44.5	6.71	3.54	0.14
2018	10	13	310.39	2.56	39.77	6.88	3.09	0
2018	10	14	464.59	0.27	23.33	3.3	1.91	0
2018	10	15	273.1	1.09	6.16	1.16	0.01	0
2018	10	16	375.9	0.3	7.36	1.31	0.17	0
2018	10	17	235.27	0.35	4.12	0.81	0.01	0	7576.09	27.13	495.96	81.16	33.74	0.99
2018	11	1	7.58	11.44	218.42	35.65	11.04	0.24
2018	11	2	10.96	3.48	102.46	17.25	2.25	0
2018	11	3	3.7	2.87	88.2	15.11	2.97	0.07
2018	11	4	6.96	10.39	210.38	34.18	10.67	0.22
2018	11	5	2.97	1.56	62.37	10.81	2.21	0.04
2018	11	6	3.83	0.55	27.91	4.98	0.89	0
2018	11	7	2.78	0.92	8.33	1.59	0.09	0
2018	11	8	3.78	0.65	23.19	4.09	0.11	0
2018	11	9	1.35	0.44	21.12	3.63	0.72	0
2018	11	10	11.58	1.71	46.4	7.96	1.98	0
2018	11	11	5.73	2.68	59.14	9.8	1.89	0
2018	11	12	9.02	4.65	96.44	14.48	4.75	0.07
2018	11	13	11.99	4.1	110.55	18.92	5.74	0
2018	11	14	5.37	1.69	37	4.79	2.2	0
2018	11	15	4.49	1.04	12.64	2.44	0.01	0
2018	11	16	3.72	0.56	15.13	2.75	0.24	0
2018	11	17	2.62	0.37	7.08	1.45	0.01	0	98.43	49.1	1146.76	189.88	47.77	0.64
2018	12	1	27.36	55.46	1218.44	202.33	33.09	0.26
2018	12	2	28.32	18.29	626.18	107.19	7.11	0
2018	12	3	9.01	14.55	444.03	76.3	7.78	0.08
2018	12	4	24.39	50.51	1183.25	196.16	32.04	0.23
2018	12	5	5.76	8.44	337.43	58.73	5.83	0.04
2018	12	6	8.11	3.52	195.49	34.7	2.84	0
2018	12	7	20.52	4.43	35.82	6.59	0.18	0
2018	12	8	11.63	3.27	94.41	16.44	0.23	0
2018	12	9	4.98	2.28	88.87	15.49	1.21	0
2018	12	10	19.61	7.19	196.43	34.12	4.02	0
2018	12	11	22.96	11.69	218.6	36.01	4.25	0
2018	12	12	7.19	18.95	376.98	56.83	9.97	0.05
2018	12	13	36.66	18.04	460.31	80.83	11.79	0
2018	12	14	6.3	6.33	154.72	20.73	4.37	0
2018	12	15	27.9	4.94	50.97	9.44	0.02	0
2018	12	16	12.26	2.78	59.02	10.47	0.69	0
2018	12	17	10.78	1.84	45.65	8.67	0.03	0	283.74	232.51	5786.6	971.03	125.45	0.66
2019	1	1	1685.33	61.03	1340.53	216.55	43.34	0.26
2019	1	2	583.21	19.94	711.5	119.74	9.73	0
2019	1	3	690.69	14.81	448.09	75.77	8.99	0.07
2019	1	4	1375.11	56.78	1305.44	210.7	41.99	0.22
2019	1	5	396.38	8.44	336.61	58.04	6.63	0.04
2019	1	6	180.97	3.63	204.22	36.06	3.23	0
2019	1	7	542.67	3.6	36	6.39	0.19	0
2019	1	8	348.68	2.52	88.7	15.19	0.26	0
2019	1	9	205.55	2	80.02	13.91	1.31	0
2019	1	10	1003.75	7.45	225.22	38.54	5.73	0
2019	1	11	799.14	14.19	221.43	34.46	4.81	0
2019	1	12	858.53	28.78	654.4	90.59	21.62	0.11
2019	1	13	1360.41	17.31	482.39	83.56	15.33	0
2019	1	14	72.87	12.57	426.6	56.03	14.11	0
2019	1	15	645.63	4.1	43.3	7.84	0.02	0
2019	1	16	278.13	2.11	50.95	8.97	0.55	0
2019	1	17	221.34	1.24	44.27	8.18	0.03	0	11248.4	260.5	6699.67	1080.52	177.87	0.7
2019	2	1	6355.7	27.4	845.52	139.36	24.27	0.13
2019	2	2	2506.74	8.51	445.13	75.44	5.36	0
2019	2	3	2488.01	7.13	304.37	52.27	5.25	0.04
2019	2	4	5436.3	25.47	826.73	136.12	23.53	0.11
2019	2	5	1456.33	4.52	238.29	41.5	3.89	0.02
2019	2	6	697.4	2.04	141.98	25.13	1.83	0
2019	2	7	1149.35	1.59	19.41	3.51	0.1	0
2019	2	8	1128.06	1.13	59.06	10.17	0.15	0
2019	2	9	612.11	1.24	63.08	11.09	0.85	0
2019	2	10	3063.76	3.15	128.67	22.46	2.73	0
2019	2	11	963.01	5.63	129.66	20.83	2.74	0
2019	2	12	1191.32	13.27	406.42	56.96	12.81	0.06
2019	2	13	2654.42	7.83	275.23	48.23	7.27	0
2019	2	14	121.46	6.6	270.61	35.73	8.45	0
2019	2	15	1045.94	1.87	27.22	5	0.01	0
2019	2	16	786.56	0.99	32.89	5.88	0.31	0
2019	2	17	529.22	0.62	27.44	5.12	0.02	0	32185.7	118.99	4241.71	694.8	99.57	0.36
2019	3	1	15535.1	138.46	4850.93	805.49	113.93	0.36
2019	3	2	7413.7	40.13	2498.86	426.56	22.98	0
2019	3	3	6028.48	36.6	1812.66	314.35	21.94	0.1
2019	3	4	13811.1	128.9	4736.79	785.5	110.75	0.3
2019	3	5	3656.29	24.46	1429.01	250.58	16.17	0.05
2019	3	6	1774.67	11.48	828.7	147.28	7.7	0
2019	3	7	2305.37	8.07	116.1	21.4	0.41	0
2019	3	8	2804.07	5.74	349.52	60.76	0.62	0
2019	3	9	1436.7	7.38	414.51	73.36	3.3	0
2019	3	10	7779.3	16.93	831.23	146.25	12.3	0
2019	3	11	1596.6	27.79	724.63	117.41	15.66	0
2019	3	12	2704.5	64.55	2490.09	352.67	64.03	0.19
2019	3	13	6371.4	41.37	1752.12	311.15	32.89	0
2019	3	14	1171.54	31.45	1727.52	232.01	41	0
2019	3	15	2039.99	9.68	163.83	30.44	0.05	0
2019	3	16	2050.39	5.4	198.13	35.57	1.83	0
2019	3	17	1274.07	3.12	149.48	28.12	0.06	0	79753.3	601.51	25074.1	4138.9	465.62	1
2019	4	1	16419.8	15	314.93	54.44	14.1	0.13
2019	4	2	7599.6	5.11	166.96	29.08	3.11	0
2019	4	3	6315.6	3.64	113.7	20.35	3.41	0.04
2019	4	4	14703.9	13.91	306.58	52.63	13.65	0.11
2019	4	5	3741.89	1.98	88.9	16.1	2.57	0.02
2019	4	6	1847.6	0.75	53.68	10	1.24	0
2019	4	7	2096.82	0.96	8.76	1.94	0.09	0
2019	4	8	2722.71	0.69	22.53	4.06	0.1	0
2019	4	9	1467.61	0.44	23.45	4.22	0.63	0
2019	4	10	7245.6	1.32	49.31	8.96	1.84	0
2019	4	11	1312.57	3.7	48.81	9.09	1.63	0
2019	4	12	2437.76	6.06	108	16.99	4.92	0.04
2019	4	13	6457.9	4.03	111.41	21.52	5.23	0
2019	4	14	1100.56	2.05	58.21	7.87	2.65	0
2019	4	15	1820.77	1.06	12.24	2.63	0.01	0
2019	4	16	1883.57	0.53	13.42	2.61	0.2	0
2019	4	17	1228.3	0.35	11.95	2.56	0.01	0	80402.6	61.58	1512.84	265.05	55.39	0.34
2019	5	1	6358.3	39.41	737.94	136.17	31.12	0.35
2019	5	2	3075.47	12.22	371	66.55	6.52	0
2019	5	3	2424.43	9.71	257.69	50.31	7.73	0.1
2019	5	4	5709.9	36.07	706.06	126.88	30.06	0.31
2019	5	5	1485.08	5.25	190.74	37.87	5.81	0.05
2019	5	6	749.61	2.16	114.24	24.46	2.89	0
2019	5	7	876.68	2.91	32.73	9.68	0.25	0
2019	5	8	1099.89	1.92	56.76	11.59	0.22	0
2019	5	9	594.09	1.09	47.31	8.92	1.28	0
2019	5	10	2952.11	4.11	115.51	22.88	3.71	0
2019	5	11	475.99	10.47	160.09	36.22	4.92	0
2019	5	12	889.37	16.74	295.9	53.6	12.83	0.12
2019	5	13	2596.76	13.62	317.15	71.52	13.97	0
2019	5	14	422.18	5.28	134.45	17.71	6.26	0
2019	5	15	773.23	3.2	47.29	12.88	0.04	0
2019	5	16	775.99	1.64	39.51	9.39	0.58	0
2019	5	17	519.76	1.1	36.94	10.55	0.04	0	31778.8	166.9	3661.31	707.18	128.23	0.93
2019	6	1	2625.32	138.34	4218.95	939.53	124.87	0.83
2019	6	2	2073.27	39.75	1754.71	358.99	21.4	0
2019	6	3	907.86	37.55	1765.14	398.45	23.32	0.24
2019	6	4	2792.57	125.24	3908.9	837.66	120.21	0.7
2019	6	5	467.19	23.53	1281.02	293.98	16.86	0.13
2019	6	6	204.58	10.66	678.83	178.77	7.88	0
2019	6	7	431.71	11.99	312.33	102.77	2.25	0
2019	6	8	423.08	7.59	451.57	101.02	1.03	0
2019	6	9	167.66	7.5	416.4	82.51	3.9	0
2019	6	10	933.53	19.62	955.29	208	18.43	0
2019	6	11	1170.23	37.93	1164.42	310.52	40.95	0
2019	6	12	1479.29	62.08	2052.92	429.49	90.11	0.54
2019	6	13	829.49	65.55	3397.9	870.43	82.28	0
2019	6	14	487.86	17.69	854.54	116.74	36.57	0
2019	6	15	395.61	12.28	446.69	130.98	0.16	0
2019	6	16	289.47	7.98	358.36	93.03	5.09	0
2019	6	17	193.44	4.38	274.96	95.84	0.14	0	15872.2	629.66	24292.9	5548.71	595.45	2.44
2019	7	1	732.49	20.82	302.84	55.02	21.48	0.53
2019	7	2	381.39	6.53	156.19	27.57	4.9	0
2019	7	3	268.69	5.21	104.87	20.02	5.52	0.17
2019	7	4	636.86	18.51	291.27	51.79	20.78	0.48
2019	7	5	146.41	2.71	74.81	14.58	4.17	0.1
2019	7	6	74.45	1.1	42.22	8.9	1.99	0
2019	7	7	157.16	2.13	12.19	3.41	0.18	0
2019	7	8	157.51	1.34	26.15	5.08	0.18	0
2019	7	9	63.68	0.63	19.38	3.61	1.04	0
2019	7	10	368.86	2.53	43.61	8.6	2.78	0
2019	7	11	57.4	5.51	72.93	16.07	3.5	0
2019	7	12	96.16	8.73	123.6	22.68	8.06	0.13
2019	7	13	302.33	8.52	122.93	28.06	9.46	0
2019	7	14	42.67	2.71	49.17	6.58	3.56	0
2019	7	15	151.28	2.49	20.67	5.27	0.03	0
2019	7	16	116.33	1.11	16.67	3.79	0.42	0
2019	7	17	91.31	0.88	14.58	4.11	0.03	0	3844.98	91.46	1494.08	285.14	88.08	1.41
2019	8	1	514.16	10.46	108.2	17.53	9.32	0.42
2019	8	2	197.78	3.41	58.52	9.72	2.33	0
2019	8	3	176.93	2.48	33.89	5.77	2.45	0.14
2019	8	4	381.84	9.26	105.22	16.9	9.01	0.39
2019	8	5	86.9	1.15	24.12	4.21	1.87	0.09
2019	8	6	51.53	0.39	13.71	2.5	0.93	0
2019	8	7	176.42	1.11	3.27	0.71	0.09	0
2019	8	8	111.28	0.72	7.74	1.34	0.1	0
2019	8	9	36.09	0.25	5.73	1.01	0.5	0
2019	8	10	186.73	1.01	12.75	2.34	1.33	0
2019	8	11	59	2.76	24.03	4.09	1.4	0
2019	8	12	67.88	4.45	44.93	6.8	3.64	0.12
2019	8	13	357.37	2.78	28.05	5.82	2.73	0
2019	8	14	13.26	1.53	20.97	2.78	1.83	0
2019	8	15	180.97	1.41	4.77	1.02	0.01	0
2019	8	16	86.98	0.51	4.39	0.84	0.15	0
2019	8	17	83.91	0.48	3.53	0.78	0.01	0	2769.03	44.16	503.82	84.16	37.7	1.16
2019	9	1	585.03	114.22	5736.77	992.37	189.74	2.1
2019	9	2	463.56	31.71	3028.64	537.92	41.73	0
2019	9	3	259.83	25.7	2199.06	388.21	46.95	0.64
2019	9	4	727.75	106.39	5600.64	968.65	184.35	1.89
2019	9	5	155.46	15.31	1732.51	308.07	35.69	0.36
2019	9	6	61.67	5.22	1014.78	182.58	17.18	0
2019	9	7	38.81	5.89	141.78	25.81	0.8	0
2019	9	8	138.54	4.16	461.92	82.28	1.29	0
2019	9	9	112.83	3.93	499.42	89.15	8.09	0
2019	9	10	348.52	12.74	998.19	177.71	23.12	0
2019	9	11	5.05	18.32	772.02	130.43	18.25	0
2019	9	12	89.48	34.13	1525.88	231.74	49.67	0.44
2019	9	13	131.34	34.35	2056.02	363.54	65.8	0
2019	9	14	100.35	13.32	735.18	100.06	25.02	0
2019	9	15	28.22	6.69	239.23	43.97	0.11	0
2019	9	16	32.86	4.54	272.32	48.9	4.27	0
2019	9	17	24.95	2.39	221.36	41.61	0.15	0	3304.25	439.01	27235.7	4713	712.21	5.43
2019	10	1	2309.59	227.86	13568.7	2334.99	309.9	1.2
2019	10	2	1012.3	65.95	6743.21	1182.71	75.73	0
2019	10	3	1080.77	50.91	5505.91	972.74	47.88	0.35
2019	10	4	2218.73	213.53	13169.5	2265.72	302.43	1.03
2019	10	5	981.93	33.65	4280.21	760.86	34.6	0.18
2019	10	6	477.1	14.82	2345.22	420.69	15.36	0
2019	10	7	239.35	11.66	405	72.18	1.72	0
2019	10	8	144.5	7.76	1193.71	210.7	1.74	0
2019	10	9	496.72	10.53	1375.61	244.63	8.05	0
2019	10	10	897.57	26.34	2941.27	520.81	37.62	0
2019	10	11	228.88	40.06	1975.59	326.02	43.53	0
2019	10	12	214.34	92.45	5230.43	760.75	164.73	0.88
2019	10	13	672.31	69.11	5989.14	1059.95	108.65	0
2019	10	14	14.4	43.59	3193.08	430.45	101.49	0
2019	10	15	261.29	12.29	579.11	104.77	0.13	0
2019	10	16	88.78	8.95	711.7	126.82	7.13	0
2019	10	17	89.01	4.25	463.7	85.71	0.15	0	11427.6	933.71	69671.1	11880.5	1260.84	3.64
2019	11	1	827.68	56.13	1766.76	288.79	57.47	0.43
2019	11	2	312.37	17.27	902.52	152.27	12.57	0
2019	11	3	270.11	14.46	666.35	113.3	13.35	0.13
2019	11	4	690.57	52.53	1722.14	281.25	55.75	0.37
2019	11	5	149.27	9.21	518.83	89.09	10.08	0.07
[truncated: 30 more rows]
