# Supplementary material for: Towards a multi-basin SWAT model for the migration of nutrients and pesticides to Puck Bay (Southern Baltic Sea)
Source: PeerJ. 2021 Feb 25;9:e10938. doi: 10.7717/peerj.10938 (PMC7916535; doi:10.7717/peerj.10938)
Supplement: Data S2 [file peerj-09-10938-s005.xls]

## Sheet: monthly S3
	Nutrients concentration in Gizdepka, for 2011-2019
Scenario	average Norg	min Norg	max Norg	average NO3	min NO3	max NO3	average Pmin	min Pmin	max Pmim	average Porg	min Porg	max Porg
	mg/l	mg/l	mg/l	mg/l	mg/l	mg/l	mg/l	mg/l	mg/l	mg/l	mg/l	mg/l
S1 rotationcrops	3.91	0	58.157	4.005	0	73.871	0.038	0	0.472	0.757	0	12.124
S2 rotation crops autofertilization	3.87	0	56.916	4.504	0	206.873	0.028	0	0.365	0.679	0	10.686
S3 winter wheat	1.026	0	17.223	1.686	0	79.555	0.034	0	0.41	0.211	0	3.876
S4 winter wheat autofertilization	0.998	0	18.417	6.387	0	260.915	0.029	0	0.376	0.196	0	3.535
S5 silage corn	7.766	0	61.154	5.239	0	67.588	0.045	0	0.372	1.553	0	12.428
S6 silage corn autofertilization	7.469	0	58.365	3.61	0	164.452	0.029	0	0.326	1.313	0	10.524
S7 winter canola	4.815	0	42.101	5.839	0	74.875	0.042	0	0.51	0.911	0	8.326
S8 winter canola autofertilization	4.785	0	41.812	3.015	0	137.845	0.029	0	0.381	0.821	0	7.56
S9 mixture of spring cereals	3.289	0	45.202	3.118	0	74.711	0.032	0	0.353	0.643	0	9.133
S10 mixture of spring cereals autofertilization	2.826	0	44.343	5.421	0	218.489	0.027	0	0.319	0.517	0	8.254
S11 potato	7.309	0	75.888	4.765	0	71.94	0.037	0	0.426	1.449	0	15.769
S12 potato autofertilization	6.992	0	71.609	1.939	0	69.942	0.029	0	0.313	1.259	0	13.198
S13 peas	3.859	0	53.979	5.993	0	54.226	0.031	0	0.344	0.747	0	10.459
	Average monthly nutrients concentration in Gizdepka, for 2011-2019, winter wheat (S3)
	Month	Flow	Organic N	N-NO3	Mineral P	Organic P
		m3/s	mg/l	mg/l	mg/l	mg/l
	1	0.375	0.535	1.613	0.015	0.101
	2	0.471	0.522	1.503	0.012	0.1
	3	0.361	0.442	1.58	0.012	0.085
	4	0.248	0.388	1.683	0.011	0.079
	5	0.164	0.545	1.847	0.019	0.129
	6	0.131	1.451	1.761	0.053	0.416
	7	0.218	1.403	1.345	0.057	0.34
	8	0.108	1.087	3.202	0.04	0.198
	9	0.166	2.815	1.689	0.085	0.51
	10	0.121	1.337	1.192	0.045	0.242
	11	0.215	1.072	1.316	0.036	0.196
	12	0.307	0.724	1.47	0.024	0.135

## Sheet: monthly S4
	Nutrients concentration in Gizdepka, for 2011-2019
Scenario	average Norg	min Norg	max Norg	average NO3	min NO3	max NO3	average Pmin	min Pmin	max Pmim	average Porg	min Porg	max Porg
	mg/l	mg/l	mg/l	mg/l	mg/l	mg/l	mg/l	mg/l	mg/l	mg/l	mg/l	mg/l
S1 rotationcrops	3.91	0	58.157	4.005	0	73.871	0.038	0	0.472	0.757	0	12.124
S2 rotation crops autofertilization	3.87	0	56.916	4.504	0	206.873	0.028	0	0.365	0.679	0	10.686
S3 winter wheat	1.026	0	17.223	1.686	0	79.555	0.034	0	0.41	0.211	0	3.876
S4 winter wheat autofertilization	0.998	0	18.417	6.387	0	260.915	0.029	0	0.376	0.196	0	3.535
S5 silage corn	7.766	0	61.154	5.239	0	67.588	0.045	0	0.372	1.553	0	12.428
S6 silage corn autofertilization	7.469	0	58.365	3.61	0	164.452	0.029	0	0.326	1.313	0	10.524
S7 winter canola	4.815	0	42.101	5.839	0	74.875	0.042	0	0.51	0.911	0	8.326
S8 winter canola autofertilization	4.785	0	41.812	3.015	0	137.845	0.029	0	0.381	0.821	0	7.56
S9 mixture of spring cereals	3.289	0	45.202	3.118	0	74.711	0.032	0	0.353	0.643	0	9.133
S10 mixture of spring cereals autofertilization	2.826	0	44.343	5.421	0	218.489	0.027	0	0.319	0.517	0	8.254
S11 potato	7.309	0	75.888	4.765	0	71.94	0.037	0	0.426	1.449	0	15.769
S12 potato autofertilization	6.992	0	71.609	1.939	0	69.942	0.029	0	0.313	1.259	0	13.198
S13 peas	3.859	0	53.979	5.993	0	54.226	0.031	0	0.344	0.747	0	10.459
	Average monthly nutrients concentration in Gizdepka, for 2011-2019, winter wheat (S4)
	Month	Flow	Organic N	N-NO3	Mineral P	Organic P
		m3/s	mg/l	mg/l	mg/l	mg/l
	1	0.36	0.568	6.687	0.014	0.1
	2	0.463	0.605	7.052	0.012	0.109
	3	0.356	0.479	7.596	0.011	0.086
	4	0.247	0.403	7.906	0.01	0.078
	5	0.164	0.571	8.127	0.018	0.129
	6	0.131	1.421	6.843	0.05	0.403
	7	0.213	1.392	4.294	0.055	0.329
	8	0.095	0.903	4.905	0.037	0.158
	9	0.151	2.451	5.085	0.049	0.422
	10	0.11	1.434	9.105	0.034	0.244
	11	0.201	1.047	3.775	0.033	0.178
	12	0.29	0.711	5.261	0.023	0.123

## Sheet: daily S3
Daily outflow and nutients concentration in Gizdepka in 2019
Da	Year	Month	Flow	Organic N	N-NO3	Mineral P	Organic P
			m3/s	mg/l	mg/l	mg/l	mg/l
1	2019	1	0.3356	3.84883	0	0.115223	0.734588
2	2019		0.1363	3.6998	0.995218	0.127884	0.693935
3	2019		0.08722	2.91674	0.997371	0.118846	0.540619
4	2019		0.05642	1.80422	1.99541	0.0466491	0.313866
5	2019		0.05065	0.852574	1.99901	0.0357162	0.146224
6	2019		0.04823	0.384203	1.99973	0.00943108	0.0644097
7	2019		0.04889	0.16439	2.99946	0.00306101	0.0274141
8	2019		0.07056	0.408275	3.99909	0.048865	0.0729941
9	2019		0.2687	1.77122	0.99674	0.0845118	0.332146
10	2019		0.1105	1.303	1.99744	0.0623638	0.235776
11	2019		0.08037	0.69744	2.0003	0.0320422	0.127708
12	2019		0.07151	0.322896	2.99913	0.0116178	0.0580727
13	2019		0.06946	0.141735	2.99933	0.00420739	0.025311
14	2019		0.06917	0.0612755	3.00019	0.00163998	0.0108964
15	2019		0.06954	0.0263138	2.99921	0.000671077	0.00468688
16	2019		0.1089	0.791267	4.9963	0.0570201	0.141248
17	2019		0.825	2.51684	0	0.0825477	0.479798
18	2019		0.2658	2.72674	0.994552	0.0866532	0.513823
19	2019		0.1439	1.87888	1.9955	0.0576371	0.344085
20	2019		0.1103	1.0104	2.00002	0.0239666	0.184996
21	2019		0.2066	1.44144	1.99773	0.0654333	0.26924
22	2019		0.127	0.795786	1.99949	0.0321705	0.145815
23	2019		0.1095	0.367094	3.0008	0.0131807	0.0665377
24	2019		0.1051	0.160231	2.99869	0.00467588	0.0289737
25	2019		0.1044	0.0689345	3.00106	0.00179487	0.0124499
26	2019		0.105	0.0296186	3.00154	0.000726742	0.00534612
27	2019		0.106	0.0127642	3.00052	0.000303656	0.00230171
28	2019		0.1068	0.00550635	3.00081	0.000129396	0.000994525
29	2019		0.1074	0.00238163	3.00021	5.59198e-05	0.000430741
30	2019		0.1077	0.00103103	2.99937	2.45237e-05	0.000187206
31	2019		0.1076	0.000446936	2.99893	1.10362e-05	8.17715e-05
1	2019	2	0.1538	0.934655	6.99637	0.050947	0.167666
2	2019		0.1202	0.368888	3.99893	0.0164078	0.0666424
3	2019		0.1114	0.151377	2.99949	0.00604158	0.0273248
4	2019		0.1081	0.0641232	2.99898	0.00200325	0.0116169
5	2019		0.1088	0.0271055	2.99883	0.000728911	0.00492217
6	2019		0.1199	0.0310347	4.00121	0.00615965	0.00563066
7	2019		0.1298	0.00773359	2.99963	0.00133753	0.00142135
8	2019		0.136	0.00240928	2.99905	0.00036152	0.000445517
9	2019		0.1668	0.40884	1.99979	0.0251049	0.0734829
10	2019		0.1544	0.129834	1.99998	0.00654565	0.023403
11	2019		0.1585	0.0699337	2.00009	0.00688384	0.0124138
12	2019		0.1613	0.0369753	1.99981	0.00429597	0.0065663
13	2019		0.1619	0.0112738	1.99955	0.000972251	0.00202671
14	2019		0.1632	0.00403391	1.99993	0.000363817	0.0007404
15	2019		0.1641	0.00159611	2.00025	9.48637e-05	0.000295523
16	2019		0.1646	0.000664701	1.9998	2.77046e-05	0.000123546
17	2019		0.1642	0.000282303	1.99973	9.52288e-06	5.29926e-05
18	2019		0.1636	0.000121966	2.0007	3.81393e-06	2.31481e-05
19	2019		0.1624	5.3302e-05	2.00052	0	1.03055e-05
20	2019		0.1605	2.33284e-05	1.99968	0	4.73059e-06
21	2019		0.8677	2.21424	0.996542	0.0652934	0.42324
22	2019		0.3296	1.66588	0.997632	0.0475815	0.315302
23	2019		0.2242	0.928714	1.99939	0.0242426	0.173972
24	2019		0.1922	0.449293	1.99987	0.00888229	0.0846076
25	2019		0.1797	0.204881	1.99922	0.003431	0.0382646
26	2019		0.1738	0.0917668	2.00049	0.00140114	0.0170015
27	2019		0.1703	0.0405398	2.00015	0.00059318	0.0074963
28	2019		0.1674	0.0177552	2.00023	0.000256441	0.00330283
1	2019	3	0.1652	0.00783982	1.99954	0.000112238	0.00145447
2	2019		0.161	0.0034751	1.99994	4.99411e-05	0.000645344
3	2019		0.1569	0.00425858	1.99983	0.00184934	0.000897747
4	2019		0.4939	1.91503	6.98569	0.0636937	0.361353
5	2019		0.2405	1.15259	4.99538	0.0370803	0.214108
6	2019		0.4022	1.79884	2.9928	0.0593955	0.33928
7	2019		2.818	2.22035	0	0.066249	0.434952
8	2019		0.7518	2.42628	0	0.0649213	0.472169
9	2019		0.3833	1.80662	0.998577	0.0479208	0.344535
10	2019		0.6818	2.12706	0	0.0626236	0.405381
11	2019		0.35	1.35946	0.999008	0.0353836	0.259358
12	2019		0.2822	0.671805	1.99983	0.0159913	0.12665
13	2019		0.2629	0.305179	2.00004	0.0058993	0.0579364
14	2019		0.2608	0.156836	2.00017	0.00610657	0.0296497
15	2019		0.577	1.71986	0.997737	0.0540792	0.324957
16	2019		0.5738	1.69375	0.997855	0.0520006	0.322331
17	2019		0.494	1.61123	0.998322	0.0458277	0.307158
18	2019		0.5311	1.39778	0.998539	0.0424303	0.269357
19	2019		0.3776	0.671272	0.999858	0.0184401	0.127756
20	2019		0.3446	0.297614	2.0001	0.00712716	0.0568963
21	2019		0.3354	0.128405	1.99975	0.00266093	0.0246182
22	2019		0.3338	0.0556513	1.99963	0.00104264	0.0106379
23	2019		0.3332	0.024159	2.00011	0.000430033	0.00460948
24	2019		0.3323	0.0104943	1.99995	0.000182684	0.00200448
25	2019		0.3312	0.00456044	1.9996	7.88728e-05	0.000873996
26	2019		0.3278	0.00200304	1.99986	3.45633e-05	0.000383449
27	2019		0.3173	0.000894045	2.00002	1.55792e-05	0.00017166
28	2019		0.3152	0.000394738	2.00013	6.96574e-06	7.54224e-05
29	2019		0.3105	0.00017445	1.99984	3.20384e-06	3.33617e-05
30	2019		0.3061	7.71731e-05	1.99985	0	1.48221e-05
31	2019		0.2997	3.42395e-05	1.99968	0	6.68493e-06
1	2019	4	0.2931	1.51478e-05	1.9997	0	3.088e-06
2	2019		0.2874	6.74953e-06	1.99989	0	1.49247e-06
3	2019		0.2789	3.0535e-06	2.00025	0	0
4	2019		0.2751	1.41573e-06	1.99969	0	0
5	2019		0.2689	0	2.00018	0	0
6	2019		0.2606	0	1.99993	0	0
7	2019		0.2527	0	1.9997	0	0
8	2019		0.2469	0	1.9998	0	0
9	2019		0.2403	0	2.0003	0	0
10	2019		0.2355	0	2.00028	0	0
11	2019		0.2296	0	1.99975	0	0
12	2019		0.2284	0	1.99962	0	0
13	2019		0.2234	0	2.00034	0	0
14	2019		0.2178	0	2.00022	0	0
15	2019		0.213	0	1.99965	0	0
16	2019		0.2075	0	1.99967	0	0
17	2019		0.2003	0	2.00047	0	0
18	2019		0.1925	0	1.99976	0	0
19	2019		0.1856	0	1.99927	0	0
20	2019		0.1797	0	1.99922	0	0
21	2019		0.1706	0	2.00002	0	0
22	2019		0.1644	0	2.00012	0	0
23	2019		0.1593	0	2.00022	0	0
24	2019		0.1541	0	2.00011	0	0
25	2019		0.1491	0	2.00043	0	0
26	2019		0.145	0	2.00032	0	0
27	2019		0.1392	0	2.00052	0	0
28	2019		0.4844	2.01471	5.9758	0.0785861	0.421484
29	2019		0.2133	1.20841	3.99314	0.0468932	0.242931
30	2019		0.153	0.634532	2.99867	0.0200996	0.123381
1	2019	5	0.1317	0.308466	3.0003	0.00780569	0.0597598
2	2019		0.1284	0.137465	2.00022	0.00241307	0.0259425
3	2019		0.1209	0.0622741	2.00081	0.000901323	0.0116411
4	2019		0.1121	0.0287235	2.00094	0.000376545	0.00532655
5	2019		0.1075	0.0129522	1.99935	0.000161499	0.00238803
6	2019		0.1104	0.00557317	2.0003	6.79558e-05	0.00102783
7	2019		0.1063	0.00250318	1.99906	3.04541e-05	0.000458934
8	2019		0.1007	0.00114373	2.00104	1.42291e-05	0.000208494
9	2019		0.09626	0.000517984	1.99955	6.85595e-06	9.411e-05
10	2019		0.09106	0.000236032	1.99934	3.56272e-06	4.29357e-05
11	2019		0.08966	0.000104523	1.99958	0	1.93245e-05
12	2019		0.083	4.94617e-05	1.99967	0	9.77661e-06
13	2019		0.08299	2.16447e-05	1.99991	0	4.68039e-06
14	2019		0.07895	9.94242e-06	1.99962	0	2.53178e-06
15	2019		0.2168	2.36553	2.97733	0.130529	0.570696
16	2019		0.221	2.58348	0.986153	0.133652	0.612745
17	2019		0.4046	4.07352	0	0.143489	0.948868
18	2019		0.1617	2.35204	0.990632	0.0944107	0.503476
19	2019		0.1028	1.33079	1.99732	0.037278	0.26188
20	2019		0.08133	0.674834	1.99946	0.0138482	0.128847
21	2019		0.07114	0.317091	1.99951	0.00539657	0.0587815
22	2019		0.06496	0.146173	2.00088	0.00223963	0.0266189
23	2019		0.05646	0.0694526	2.00015	0.00102191	0.0124863
24	2019		0.05392	0.0307383	1.99992	0.000446692	0.00555092
25	2019		0.05217	0.0137704	2.00001	0.000198204	0.00246701
26	2019		0.05359	0.258737	3.99985	0.0398905	0.0830854
27	2019		0.0954	1.76887	1.98603	0.164755	0.504576
28	2019		0.07355	1.42508	1.99065	0.137677	0.445496
29	2019		0.05355	0.434001	1.99947	0.0446321	0.117535
30	2019		0.04797	0.142595	2.00019	0.0105342	0.0333928
31	2019		0.0455	0.0515364	1.9999	0.00265313	0.0107346
1	2019	6	0.04679	0.0203356	1.99992	0.000726997	0.00381185
2	2019		0.0422	0.00891094	1.99996	0.000247581	0.00155317
3	2019		0.03982	0.00404308	1.99974	9.2488e-05	0.000737985
4	2019		0.03933	0.00175392	1.99964	3.81683e-05	0.000320178
5	2019		0.03684	0.000773804	2.00033	1.70878e-05	0.000141189
6	2019		0.03605	0.000343851	2.00018	8.40525e-06	6.30554e-05
7	2019		0.033	0.000150989	1.99986	4.78395e-06	2.87318e-05
8	2019		0.03283	6.64901e-05	1.99999	3.19653e-06	1.35801e-05
9	2019		0.03196	2.97174e-05	2.00011	0	6.87346e-06
10	2019		4.495	6.9084	0	0.123259	1.81812
11	2019		0.9664	5.4469	0	0.134376	1.41921
12	2019		0.3279	5.09344	0	0.126648	1.18106
13	2019		0.1444	4.17917	0	0.0824773	0.865651
14	2019		0.07813	3.01907	0.981419	0.0506486	0.593444
15	2019		0.229	6.37838	2.86471	0.259178	1.80839
16	2019		0.08153	3.23529	1.95054	0.143948	0.871782
17	2019		0.04938	1.66439	1.98878	0.0569563	0.372911
18	2019		0.03725	0.818419	1.99882	0.0209141	0.169463
19	2019		0.03176	0.369889	2.00032	0.00790433	0.0705887
20	2019		0.03125	0.165185	2	0.00316556	0.0300741
21	2019		0.02846	0.0733648	2.00005	0.00133025	0.0130381
22	2019		0.02661	0.0325083	2.00034	0.000576311	0.00570657
23	2019		0.02557	0.0142175	1.99978	0.000254204	0.00251036
24	2019		0.024	0.00613908	1.9999	0.000113764	0.00110774
25	2019		0.02481	0.00282937	2.00039	5.19224e-05	0.000489834
26	2019		0.02426	0.00127906	2.00042	2.45794e-05	0.000217121
27	2019		0.02318	0.000571713	1.99975	1.24229e-05	9.68667e-05
28	2019		0.02225	0.000252549	2.0001	7.04328e-06	4.3789e-05
29	2019		0.02055	0.000108363	2.00054	4.68088e-06	2.03715e-05
30	2019		0.01938	4.63739e-05	2.00008	3.66572e-06	1.00512e-05
1	2019	7	0.02172	2.25034e-05	1.99988	3.50739e-06	5.51527e-06
2	2019		0.02146	0.0765313	1.99984	0.0293774	0.0236821
3	2019		0.02001	0.0124301	1.99958	0.00669804	0.00389736
4	2019		0.335	3.40381	0	0.185738	0.805694
5	2019		0.09975	2.48538	0	0.183677	0.568435
6	2019		0.04714	1.78792	0.971545	0.15446	0.361659
7	2019		0.02891	1.06693	0.993265	0.059732	0.198893
8	2019		0.02195	0.521914	1.99949	0.020401	0.0887434
9	2019		0.05338	0.752163	0.983298	0.187748	0.205701
10	2019		0.02374	0.288572	1.99743	0.0744953	0.0704
11	2019		0.01842	0.0969533	2.00002	0.0237137	0.020019
12	2019		0.01685	0.0379437	2.00022	0.00970574	0.00721233
13	2019		0.01723	0.0146506	2.00044	0.00226108	0.00252776
14	2019		0.01573	0.00602249	1.99989	0.000528817	0.000980081
15	2019		0.01377	0.0025468	2.00046	0.000140368	0.000407236
16	2019		0.01436	0.00110341	1.99967	4.44909e-05	0.000176271
17	2019		0.0138	0.000494247	1.99946	1.77134e-05	7.8536e-05
18	2019		0.01274	0.000219035	2.00048	9.17568e-06	3.61122e-05
19	2019		0.01207	9.84803e-05	2.00029	6.41992e-06	1.75673e-05
20	2019		0.01325	4.40601e-05	2.00035	5.48655e-06	9.34661e-06
21	2019		0.01632	0.217652	1.99568	0.0876566	0.0462396
22	2019		0.012	0.0334684	2.00039	0.0179205	0.00858796
23	2019		0.01066	0.00637443	1.99995	0.0052029	0.00174805
24	2019		0.01	0.00127315	2.00116	0.00135069	0.0003625
25	2019		0.01066	0.000258299	1.99995	0.000282729	7.75876e-05
26	2019		0.01089	5.9454e-05	2.00022	6.30675e-05	2.20534e-05
27	2019		0.01153	1.37323e-05	1.99961	1.78078e-05	7.80773e-06
28	2019		0.00979	4.09881e-06	2.00034	8.53928e-06	4.97602e-06
29	2019		0.009159	2.15837e-06	2.00041	6.79356e-06	4.61497e-06
30	2019		0.008989	1.83867e-06	1.99961	6.95423e-06	4.67135e-06
31	2019		0.009223	1.85602e-06	2.00033	7.11787e-06	4.72601e-06
1	2019	8	0.008183	1.85428e-06	1.99997	7.28277e-06	4.77927e-06
2	2019		0.007513	1.84865e-06	1.99962	7.45313e-06	4.83113e-06
3	2019		0.008805	1.95859e-06	2.00065	7.62535e-06	4.8807e-06
4	2019		0.008145	2.05193e-06	1.99935	7.79989e-06	4.92946e-06
5	2019		0.03068	1.25059	0	0	0.390832		76.62
6	2019		0.229	1.95698	2.93547	0.136008	0.389273
7	2019		0.05895	2.0851	1.92626	0.138575	0.388159
8	2019		0.02421	1.71866	0.95375	0.113494	0.297503
9	2019		0.01347	1.07492	0.983839	0.0508245	0.172022
10	2019		0.008857	0.619018	0.997981	0.021235	0.105731
11	2019		0.007034	0.293712	0.999774	0.00886896	0.0483268
12	2019		0.007487	0.134616	1.00004	0.00378279	0.0214724
13	2019		0.006601	0.0621399	0.999954	0.00164572	0.00976809
14	2019		0.005779	0.0278186	0.999989	0.000726809	0.0043941
15	2019		0.005716	0.0120317	1.00008	0.000325192	0.00196654
16	2019		0.005457	0.00545511	0.99982	0.000148467	0.000879562
17	2019		0.005295	0.00243941	1.00003	7.06685e-05	0.000394327
18	2019		0.005892	0.00112382	1.00006	3.61248e-05	0.000178326
19	2019		0.0049	0.000498394	1.00009	2.08735e-05	8.21759e-05
20	2019		0.004852	0.000219721	0.999969	1.41885e-05	3.94788e-05
21	2019		0.004462	9.92693e-05	0.999956	1.13225e-05	2.05542e-05
22	2019		0.004894	4.38462e-05	1.00014	1.11105e-05	1.23427e-05
23	2019		0.004581	2.13164e-05	1	1.13492e-05	8.85552e-06
24	2019		0.003968	1.08478e-05	0.999897	1.15857e-05	7.37381e-06
25	2019		0.004653	6.2609e-06	0.999952	1.18278e-05	7.08921e-06
26	2019		0.003995	4.22113e-06	0.999803	1.20724e-05	7.23416e-06
27	2019		0.00357	3.21513e-06	1.00017	1.2323e-05	7.38212e-06
28	2019		0.003388	3.13675e-06	0.999921	1.25716e-05	7.53271e-06
29	2019		0.003389	3.16451e-06	0.999967	1.2824e-05	7.68417e-06
30	2019		0.002972	3.2187e-06	1.00007	1.30812e-05	7.83937e-06
31	2019		0.002946	3.21764e-06	1.00026	1.3342e-05	7.99499e-06
1	2019	9	0.2638	3.14624	4.90077	0.137195	0.613803
2	2019		0.08204	2.957	4.85169	0.149684	0.57165
3	2019		0.02858	2.94414	5.79109	0.172356	0.527677
4	2019		0.01246	2.26558	4.80891	0.121686	0.376111
5	2019		0.00684	1.38263	3.91217	0.0842843	0.23825
6	2019		0.006601	0.728004	1.97957	0.102538	0.117599
7	2019		0.01401	0.489812	0.980616	0.181748	0.09327
8	2019		0.01776	0.406005	0	0.197789	0.0872617
9	2019		0.006291	0.165121	0.99753	0.079405	0.0375684
10	2019		0.1068	6.34623	0.889513	0.321538	1.18884
11	2019		0.02887	6.91558	1.8221	0.387433	1.20311
12	2019		0.01277	5.52329	1.81451	0.272902	0.880971
13	2019		0.006908	3.66758	1.91673	0.162972	0.579206
14	2019		0.006126	2.01214	0.985478	0.0852657	0.314197
15	2019		0.004302	0.940293	0.996522	0.0671522	0.149182
16	2019		0.003876	0.447614	0.999742	0.023399	0.071039
17	2019		0.1707	10.0349	0	0.362953	1.90528
18	2019		0.04677	10.307	0	0.348435	1.80899
19	2019		0.01842	8.9476	0	0.272889	1.40937
20	2019		0.009972	6.94421	0	0.188607	1.12038
21	2019		0.006382	4.32894	0	0.112585	0.658319
22	2019		0.004824	2.30306	0.988739	0.05919	0.349813
23	2019		0.003939	1.11803	0.998738	0.0286693	0.169659
24	2019		0.003599	0.520978	0.999828	0.0132721	0.0785969
25	2019		0.003642	0.229765	0.999781	0.00601267	0.0356248
26	2019		0.002952	0.102489	1.00019	0.00270219	0.0159849
27	2019		1.544	10.2697	0	0.169263	1.98348
28	2019		0.3785	11.7545	0	0.235763	2.26069
29	2019		0.5223	10.701	0	0.222928	2.07903
30	2019		0.1646	11.4756	0	0.233169	2.19246
1	2019	10	0.06828	10.9672	0	0.229685	2.03241
2	2019		0.0334	9.11372	0	0.236298	1.64879
3	2019		0.02296	5.55515	0	0.298073	0.929051
4	2019		0.01056	4.81595	0	0.156294	0.789689
5	2019		6.481	3.93422	0	0.0748984	0.77095
6	2019		2.13	7.41175	0	0.113241	1.45518
7	2019		0.6169	9.22136	0	0.154202	1.80469
8	2019		0.233	9.71129	0	0.125328	1.86328
9	2019		0.1062	8.84294	0	0.099415	1.64239
10	2019		0.2485	6.1806	0	0.172237	1.16765
11	2019		0.09779	5.60418	0.962474	0.138004	1.01692
12	2019		0.06457	3.97573	0.981206	0.120222	0.714305
13	2019		0.04516	2.20384	1.98548	0.0408014	0.380079
14	2019		0.04054	1.0749	2.99773	0.0143805	0.194452
15	2019		0.03967	0.466814	2.99928	0.00535669	0.0846101
16	2019		0.0408	0.197695	3.99986	0.0104252	0.0363959
17	2019		0.06416	1.01165	1.99335	0.0731858	0.180159
18	2019		0.04848	0.390339	2.99856	0.0262613	0.0678974
19	2019		0.04601	0.153675	3.99973	0.0067593	0.0265894
20	2019		0.04588	0.0624869	4.00098	0.00200831	0.0108829
21	2019		0.04636	0.0262139	3.9995	0.000687304	0.0045812
22	2019		0.04648	0.0111483	3.99913	0.000261961	0.00196196
23	2019		0.04679	0.00487798	3.99985	0.000107207	0.000848699
24	2019		0.04654	0.00210591	3.99895	4.59829e-05	0.000369306
25	2019		0.04619	0.000921867	3.99918	2.05572e-05	0.000161646
26	2019		0.04586	0.000400525	4.0002	9.84023e-06	7.12717e-05
27	2019		0.04554	0.000179152	4.00035	5.1974e-06	3.18706e-05
28	2019		0.04488	7.88884e-05	3.99986	3.17204e-06	1.46146e-05
29	2019		0.04421	3.45311e-05	4.00027	0	7.06592e-06
30	2019		0.04354	1.6444e-05	4.00068	0	4.25056e-06
31	2019		0.04278	7.58348e-06	3.99871	0	2.66815e-06
1	2019	11	0.04205	3.68554e-06	3.99932	0	1.99718e-06
2	2019		0.08962	1.24549	1.99272	0.0880906	0.222131
3	2019		0.05313	0.632838	2.99754	0.0430025	0.10914
4	2019		0.5194	3.12415	0	0.0894462	0.590737
5	2019		0.1568	3.04115	0.987635	0.107547	0.560914
6	2019		0.08125	2.21225	1.99715	0.057037	0.407265
7	2019		0.05861	1.23482	2.99769	0.0267383	0.220976
8	2019		0.05013	0.604447	2.99915	0.0118811	0.105628
9	2019		0.1206	2.13247	0.995217	0.0961627	0.388202
10	2019		0.06721	1.18462	2.99813	0.0478393	0.210438
11	2019		0.05451	0.552906	3.00021	0.0168037	0.096079
12	2019		0.1068	1.58439	1.99404	0.0829584	0.282416
13	2019		1.126	3.61818	0	0.0811213	0.692183
14	2019		0.296	3.91407	0	0.107608	0.73902
15	2019		0.139	3.13	0.992539	0.0664385	0.586031
16	2019		0.09424	1.86556	1.9982	0.0331355	0.336758
17	2019		0.07932	0.947288	3.00004	0.015044	0.174662
18	2019		0.07406	0.435239	3.00057	0.00655281	0.0794057
19	2019		0.07265	0.190379	2.99986	0.00281506	0.0348417
20	2019		0.07272	0.0818716	3.00016	0.00120643	0.0150406
21	2019		0.0732	0.0354021	4.00033	0.000518145	0.00647642
22	2019		0.07382	0.0151802	3.99966	0.000223579	0.00279866
23	2019		0.07416	0.00660172	4.00005	9.71841e-05	0.0012125
24	2019		0.0743	0.00286937	4.0003	4.27291e-05	0.000527142
25	2019		0.07424	0.0012483	4.00041	1.91602e-05	0.000229954
26	2019		0.07398	0.000549917	4.00039	8.91132e-06	0.000100862
27	2019		0.07354	0.000242215	4.00072	4.45241e-06	4.45871e-05
28	2019		0.07284	0.000106366	3.99944	0	2.00052e-05
29	2019		0.07205	4.70352e-05	3.99992	0	9.24641e-06
30	2019		0.08642	0.34299	3.9991	0.0278972	0.0605623
1	2019	12	0.07442	0.108229	4.00007	0.00757711	0.0193005
2	2019		0.07635	0.114755	3.00001	0.0137934	0.0197676
3	2019		0.07246	0.0330962	2.99974	0.0031403	0.00569919
4	2019		0.07202	0.0115789	3.00039	0.00103093	0.0020249
5	2019		0.07212	0.00452082	2.99944	0.000298499	0.000802097
6	2019		0.08404	0.279574	2.99956	0.0226827	0.047803
7	2019		0.1365	1.59493	1.99685	0.0667905	0.288716
8	2019		0.5068	1.6692	0	0.0670054	0.317899
9	2019		0.1915	1.41367	0.998453	0.0534341	0.264421
10	2019		0.1306	0.827555	1.99932	0.0323294	0.152962
11	2019		0.1141	0.386479	1.99934	0.0161084	0.070966
12	2019		0.1115	0.163386	2.99992	0.00604447	0.0302898
13	2019		0.1141	0.0685416	2.99952	0.00230873	0.0127203
14	2019		0.1183	0.0286661	3.00065	0.00089814	0.00533112
15	2019		0.1264	0.0116931	3.00065	0.000349511	0.00218754
16	2019		0.1445	0.00442138	2.00003	0.000130399	0.000819396
17	2019		0.1607	0.00174151	2.00007	5.07473e-05	0.000326048
18	2019		0.1709	0.000712459	1.9999	2.08726e-05	0.000134704
19	2019		0.1771	0.000299122	2.00047	8.97955e-06	5.70404e-05
20	2019		0.1807	0.000128231	1.99968	4.0474e-06	2.45701e-05
21	2019		0.3443	1.6156	0.999075	0.0515001	0.304025
22	2019		0.2334	0.720528	1.99943	0.0226225	0.135576
23	2019		0.2099	0.308844	2.00051	0.00817188	0.0578428
24	2019		0.2029	0.133139	1.99937	0.00296853	0.0254242
25	2019		0.2055	0.0804271	2.00054	0.00447475	0.0150716
26	2019		0.232	0.370819	2.00002	0.0173312	0.0677482
27	2019		0.216	0.117295	1.99974	0.00468375	0.0216371
28	2019		0.2139	0.0442888	1.9999	0.00163033	0.00827879
29	2019		0.2148	0.0180778	2.00014	0.000566311	0.00340325
30	2019		0.2154	0.00764082	2.00048	0.000199779	0.00144434
31	2019		0.2205	0.0211535	1.99987	0.00257884	0.00381078

## Sheet: daily S4
Daily outflow and nutients concentration in Gizdepka in 2019
Da	Year	Month	Flow	Organic N	N-NO3	Mineral P	Organic P
			m3/s	mg/l	mg/l	mg/l	mg/l
1	2019	1	0.3178	2.78317	0	0.0926509	0.490205
2	2019		0.1287	2.9767	1.99556	0.105399	0.509997
3	2019		0.08205	2.45447	2.99755	0.102509	0.415566
4	2019		0.05336	1.50879	4.99533	0.0391514	0.237728
5	2019		0.04833	0.708382	5.99898	0.0326411	0.110137
6	2019		0.04622	0.317273	7.00154	0.00768016	0.0481043
7	2019		0.04705	0.135199	6.99856	0.00225971	0.0203635
8	2019		0.0671	0.402591	6.99964	0.0489181	0.0678575
9	2019		0.2552	2.13885	1.99644	0.0867148	0.368402
10	2019		0.1059	1.54867	3.99901	0.0643514	0.2564
11	2019		0.07779	0.822341	4.99921	0.0299655	0.137716
12	2019		0.06952	0.380586	6.00014	0.00898356	0.0624654
13	2019		0.06768	0.167078	6.0008	0.00302007	0.0271909
14	2019		0.06747	0.0722372	6.00061	0.00112121	0.0116942
15	2019		0.06788	0.0310154	6.00017	0.00044639	0.00502657
16	2019		0.1035	0.644011	6.99477	0.0518429	0.107197
17	2019		0.7997	2.05806	0.998638	0.0723796	0.364575
18	2019		0.256	2.30351	1.99562	0.0738751	0.400662
19	2019		0.1387	1.63055	3.99627	0.0478568	0.279964
20	2019		0.106	0.878647	5.00087	0.0185622	0.146969
21	2019		0.1956	1.65386	3.99649	0.0660953	0.285032
22	2019		0.121	0.9155	4.99694	0.0324935	0.153811
23	2019		0.1041	0.426162	6.00162	0.0105101	0.0704451
24	2019		0.09933	0.188066	6.99944	0.00349098	0.0309131
25	2019		0.09799	0.0818182	7.00067	0.00128391	0.0133942
26	2019		0.09773	0.0354577	7.00034	0.00050889	0.00579
27	2019		0.09782	0.0153698	6.99982	0.00021132	0.00250365
28	2019		0.09783	0.00667021	7.00029	9.01744e-05	0.00108642
29	2019		0.09769	0.00290389	6.99965	3.92279e-05	0.000473081
30	2019		0.09736	0.00126369	7.00079	1.74158e-05	0.000206731
31	2019		0.09673	0.000550645	6.99972	8.03114e-06	9.06494e-05
1	2019	2	0.1397	0.858321	9.99993	0.0455507	0.147141
2	2019		0.1081	0.368529	8.00228	0.0164136	0.0613608
3	2019		0.09953	0.157918	6.99933	0.00540503	0.0259553
4	2019		0.09616	0.0681493	7.9993	0.00167304	0.0111576
5	2019		0.0968	0.0290069	8.00022	0.000575475	0.00474561
6	2019		0.1078	0.0243829	8.00093	0.00659121	0.00451045
7	2019		0.1178	0.00679215	7.00143	0.00142564	0.00122913
8	2019		0.1241	0.00228497	5.99875	0.000383968	0.000402155
9	2019		0.1534	0.352051	5.9983	0.0244157	0.0603451
10	2019		0.1425	0.124188	5.99903	0.00638402	0.0209795
11	2019		0.1465	0.0573568	6.00114	0.0068528	0.00989919
12	2019		0.1496	0.0295851	5.99902	0.00431552	0.00525011
13	2019		0.1505	0.010159	7.00212	0.000971299	0.00175726
14	2019		0.1521	0.00391434	6.99923	0.00036792	0.00067329
15	2019		0.1532	0.00161372	6.99808	8.68811e-05	0.000275526
16	2019		0.1538	0.000686468	6.99863	2.36825e-05	0.000116644
17	2019		0.1535	0.000294441	8.00006	7.67584e-06	5.03755e-05
18	2019		0.1532	0.000127677	8.00062	0	2.20602e-05
19	2019		0.1521	5.59299e-05	7.9976	0	9.86193e-06
20	2019		0.1504	2.44795e-05	7.99565	0	4.54729e-06
21	2019		0.8508	2.31264	1.99567	0.0624276	0.409473
22	2019		0.3189	1.78602	3.99594	0.0460568	0.310747
23	2019		0.2144	1.01219	5.99757	0.0206973	0.173503
24	2019		0.1827	0.493688	7.00019	0.00708888	0.0848259
25	2019		0.1704	0.225844	7.99453	0.00258922	0.0384308
26	2019		0.1647	0.101264	7.99714	0.00101967	0.0170765
27	2019		0.1614	0.0447545	8.99967	0.00042302	0.0075296
28	2019		0.1586	0.0195942	9.0053	0.000181128	0.00331751
1	2019	3	0.1566	0.0086473	9.00206	7.89343e-05	0.00146043
2	2019		0.1526	0.00383325	9.0029	3.5109e-05	0.000647723
3	2019		0.1487	0.00430661	8.99773	0.00194432	0.000878758
4	2019		0.482	1.62325	4.99222	0.0577743	0.28527
5	2019		0.2322	1.00987	6.00137	0.0324742	0.172863
6	2019		0.3917	1.7011	3.99789	0.0550485	0.297847
7	2019		2.803	3.09564	0	0.0667274	0.5562
8	2019		0.743	3.31022	1.99392	0.0669053	0.589452
9	2019		0.3758	2.45988	3.99764	0.0493084	0.429331
10	2019		0.6721	2.27658	1.99589	0.0588089	0.400555
11	2019		0.3428	1.50213	4.99697	0.0340335	0.263253
12	2019		0.2753	0.755909	6.99994	0.0128059	0.131843
13	2019		0.2562	0.342614	8.00066	0.00443402	0.0594967
14	2019		0.254	0.167915	8.99953	0.00595108	0.0291904
15	2019		0.5688	1.56071	3.99843	0.0484898	0.274091
16	2019		0.5659	1.85872	3.99847	0.0499246	0.326217
17	2019		0.4866	1.80723	4.99736	0.0445742	0.317062
18	2019		0.5238	1.60442	4.9982	0.0414086	0.285264
19	2019		0.3713	0.773995	8.00179	0.0181046	0.13513
20	2019		0.3385	0.34329	8.9994	0.005799	0.0600758
21	2019		0.3294	0.147961	9.00206	0.00197012	0.0259556
22	2019		0.3279	0.0641004	9.9998	0.000741955	0.011207
23	2019		0.3275	0.0278131	9.99788	0.000299265	0.00485228
24	2019		0.3267	0.0120771	10.0011	0.00012566	0.00210898
25	2019		0.3257	0.00524867	9.99983	5.39436e-05	0.000919316
26	2019		0.3224	0.0023044	10.9997	2.3622e-05	0.000403513
27	2019		0.3121	0.00102835	10.9993	1.06692e-05	0.000180527
28	2019		0.3101	0.000454229	10.9993	4.81102e-06	7.92755e-05
29	2019		0.3055	0.000200643	10.9982	0	3.5067e-05
30	2019		0.3012	8.87269e-05	11.0015	0	1.55743e-05
31	2019		0.2949	3.93652e-05	11.0011	0	7.02137e-06
1	2019	4	0.2884	1.74053e-05	11.0002	0	3.23785e-06
2	2019		0.2829	7.74469e-06	11.0013	0	1.55998e-06
3	2019		0.2746	3.52491e-06	11.9998	0	0
4	2019		0.2708	1.61601e-06	12.0015	0	0
5	2019		0.2648	0	11.998	0	0
6	2019		0.2565	0	11.9982	0	0
7	2019		0.2487	0	12.0022	0	0
8	2019		0.2431	0	11.9978	0	0
9	2019		0.2366	0	11.9997	0	0
10	2019		0.2319	0	11.9983	0	0
11	2019		0.226	0	11.9991	0	0
12	2019		0.2249	0	12.0012	0	0
13	2019		0.2201	0	12	0	0
14	2019		0.2146	0	12.0001	0	0
15	2019		0.2098	0	11.9989	0	0
16	2019		0.2044	0	11.9988	0	0
17	2019		0.1973	0	12.0023	0	0
18	2019		0.1896	0	11.9953	0	0
19	2019		0.1827	0	11.9985	0	0
20	2019		0.1769	0	11.9994	0	0
21	2019		0.168	0	11.9943	0	0
22	2019		0.1618	0	12.0033	0	0
23	2019		0.1568	0	12.0022	0	0
24	2019		0.1517	0	12.0013	0	0
25	2019		0.1468	0	11.9998	0	0
26	2019		0.1428	0	11.9955	0	0
27	2019		0.137	0	12.0049	0	0
28	2019		0.4856	1.95444	6.98353	0.0731483	0.384213
29	2019		0.2115	1.16945	8.99659	0.0418856	0.217253
30	2019		0.151	0.616032	9.99509	0.0148547	0.109762
1	2019	5	0.1298	0.300141	10.9945	0.00521636	0.0531355
2	2019		0.1265	0.133857	10.9977	0.00124067	0.0230109
3	2019		0.1191	0.06064	12.0017	0.000361896	0.010301
4	2019		0.1103	0.0279855	12.0043	0.00012508	0.00471567
5	2019		0.1058	0.0126133	11.9898	4.76528e-05	0.00211243
6	2019		0.1087	0.00542927	12	1.89636e-05	0.000908996
7	2019		0.1046	0.00243985	12.0056	8.45925e-06	0.000406088
8	2019		0.09915	0.00111387	12.0001	4.14986e-06	0.000184321
9	2019		0.09472	0.000504777	12.0005	0	8.32864e-05
10	2019		0.08956	0.000230034	12.0005	0	3.80461e-05
11	2019		0.08821	0.000101859	12.0005	0	1.71623e-05
12	2019		0.08159	4.82454e-05	12.9997	0	8.74545e-06
13	2019		0.08162	2.11147e-05	11.9995	0	4.23286e-06
14	2019		0.07762	9.70421e-06	12.0005	0	2.3515e-06
15	2019		0.2169	2.32549	6.97966	0.124279	0.541618
16	2019		0.2209	2.71197	4.98644	0.129625	0.607259
17	2019		0.4065	3.94344	1.98083	0.130091	0.887203
18	2019		0.1608	2.28458	4.99096	0.08551	0.461164
19	2019		0.1017	1.29739	7.99715	0.0303065	0.237058
20	2019		0.08021	0.659149	9.99979	0.0100965	0.115712
21	2019		0.07005	0.309964	10.9991	0.00354575	0.0525253
22	2019		0.0639	0.142928	11.9997	0.00136281	0.0237278
23	2019		0.05543	0.0679661	13.0002	0.000594468	0.0111147
24	2019		0.05291	0.0300782	13.0003	0.00025375	0.00493938
25	2019		0.05119	0.0134733	13.0008	0.000111445	0.00219317
26	2019		0.05264	0.262308	12.9988	0.0408523	0.0839692
27	2019		0.09453	1.70801	7.98541	0.161496	0.486324
28	2019		0.07268	1.39039	8.98949	0.136745	0.435381
29	2019		0.05268	0.415902	11.0006	0.0435456	0.111918
30	2019		0.04713	0.133643	11.9989	0.00998519	0.0306235
31	2019		0.04467	0.0474156	11.999	0.00236767	0.00945203
1	2019	6	0.04598	0.0184712	11.9995	0.000595821	0.00324467
2	2019		0.04143	0.0084396	11.9987	0.000185079	0.00146247
3	2019		0.03905	0.00363968	12.0009	6.41687e-05	0.000609084
4	2019		0.03858	0.00157531	12.0001	2.54492e-05	0.000262622
5	2019		0.03612	0.00069406	12.0003	1.13882e-05	0.000115548
6	2019		0.03535	0.000308227	11.9997	5.87053e-06	5.16659e-05
7	2019		0.03231	0.000135371	12.0004	3.66817e-06	2.36855e-05
8	2019		0.03216	5.95978e-05	11.9987	0	1.13509e-05
9	2019		0.03131	2.66747e-05	11.9992	0	5.89609e-06
10	2019		4.524	6.6927	0	0.11592	1.73253
11	2019		0.9684	5.22411	0	0.122625	1.31828
12	2019		0.3277	4.87404	0.96068	0.105957	1.07405
13	2019		0.1439	3.99342	1.96655	0.0634362	0.773348
14	2019		0.0776	2.88606	3.9853	0.0360198	0.524115
15	2019		0.2303	5.57345	3.8788	0.237764	1.62982
16	2019		0.08123	2.60036	4.95849	0.132426	0.729382
17	2019		0.04891	1.27123	6.99272	0.0492922	0.288701
18	2019		0.03675	0.602167	7.9995	0.0166887	0.121945
19	2019		0.03127	0.265608	8.99795	0.0058111	0.0480803
20	2019		0.03076	0.117208	9.00039	0.00218688	0.0198144
21	2019		0.02798	0.0517069	10.0022	0.000883981	0.00843857
22	2019		0.02614	0.0228471	10.0022	0.000375338	0.00366261
23	2019		0.02511	0.00997463	9.99768	0.000164277	0.00160451
24	2019		0.02355	0.00430231	10.0014	7.35728e-05	0.000706731
25	2019		0.02438	0.0019825	9.001	3.39674e-05	0.000312377
26	2019		0.02384	0.000896699	9.00098	1.65989e-05	0.000138753
27	2019		0.02276	0.000400821	9.00093	8.88905e-06	6.22946e-05
28	2019		0.02185	0.000177134	8.9997	5.48775e-06	2.85141e-05
29	2019		0.02016	7.60697e-05	9.00206	4.00959e-06	1.36409e-05
30	2019		0.019	3.26389e-05	8.99732	3.47283e-06	7.09064e-06
1	2019	7	0.02134	1.59998e-05	9.00326	3.56171e-06	4.29608e-06
2	2019		0.0211	0.0773433	8.99596	0.029939	0.0238503
3	2019		0.01965	0.0125636	9.00009	0.00682664	0.00392517
4	2019		0.3204	3.24103	0	0.185207	0.753543
5	2019		0.09461	2.33904	1.95368	0.171391	0.517842
6	2019		0.04492	1.66139	3.97311	0.146711	0.319498
7	2019		0.0278	0.972139	5.9952	0.0534156	0.168823
8	2019		0.0213	0.468342	6.99878	0.0164048	0.0731395
9	2019		0.05249	0.712658	2.98337	0.18844	0.197767
10	2019		0.02323	0.255796	5.99879	0.0731414	0.0638741
11	2019		0.01804	0.0797482	8.00048	0.0221922	0.0167388
12	2019		0.01653	0.030038	7.99612	0.00882234	0.00576743
13	2019		0.01693	0.0110135	7.99862	0.00216031	0.00186156
14	2019		0.01545	0.00438317	8.00072	0.000475623	0.000678788
15	2019		0.0135	0.00182184	7.99897	0.000115141	0.000272119
16	2019		0.01409	0.000783242	8.00164	3.29643e-05	0.000115987
17	2019		0.01354	0.000349359	7.99928	1.25315e-05	5.16046e-05
18	2019		0.01249	0.000154661	8.00085	6.87958e-06	2.40933e-05
19	2019		0.01183	6.95912e-05	7.99717	5.45048e-06	1.22296e-05
20	2019		0.01301	3.13416e-05	7.99954	5.56997e-06	7.07789e-06
21	2019		0.01609	0.220188	5.99349	0.0886219	0.0467854
22	2019		0.01177	0.0339552	7.00148	0.0181625	0.00871448
23	2019		0.01044	0.00646773	6.99766	0.00524824	0.0017738
24	2019		0.009784	0.00129179	6.99957	0.00137105	0.0003679
25	2019		0.01046	0.000285368	7.00088	0.000287139	9.25373e-05
26	2019		0.01068	6.01137e-05	6.99863	6.40367e-05	2.22378e-05
27	2019		0.01132	1.39052e-05	6.99966	1.80973e-05	7.87794e-06
28	2019		0.009587	4.14696e-06	6.99974	8.67301e-06	5.0174e-06
29	2019		0.00896	2.18306e-06	6.99999	6.90052e-06	4.65288e-06
30	2019		0.008794	1.86101e-06	7.00051	7.06369e-06	4.70781e-06
31	2019		0.009032	1.87733e-06	7.00057	7.22995e-06	4.76316e-06
1	2019	8	0.007996	1.87449e-06	7.00003	7.39809e-06	4.81433e-06
2	2019		0.00733	1.86796e-06	6.99971	7.57131e-06	4.86648e-06
3	2019		0.008625	1.98068e-06	7.00081	7.74691e-06	4.91546e-06
4	2019		0.007969	2.07546e-06	7.00051	7.92422e-06	4.96135e-06
5	2019		0.0305	1.25721	78.6278	0	0.39276		76.62
6	2019		0.1694	1.26946	3.92043	0.148605	0.253277
7	2019		0.03868	1.26842	3.92585	0.12388	0.232768
8	2019		0.01603	0.872929	3.9632	0.10751	0.134513
9	2019		0.009955	0.518886	4.99702	0.0397971	0.0825823
10	2019		0.007255	0.242011	6.00001	0.0117926	0.0368201
11	2019		0.006255	0.109264	6.00075	0.00367484	0.0160908
12	2019		0.007065	0.0497038	5.99919	0.00127569	0.00724096
13	2019		0.006336	0.0226147	5.99894	0.0004923	0.00324242
14	2019		0.005583	0.0100504	5.99953	0.000206003	0.0014493
15	2019		0.005551	0.0043348	6.00075	9.19921e-05	0.00064824
16	2019		0.005307	0.00196303	5.99968	4.44687e-05	0.000291369
17	2019		0.005154	0.000877824	6.00037	2.44327e-05	0.000132448
18	2019		0.005756	0.000405173	6.00018	1.56278e-05	6.17914e-05
19	2019		0.004767	0.000180446	5.99948	1.1829e-05	3.0398e-05
20	2019		0.004722	8.03714e-05	5.00024	1.08167e-05	1.65792e-05
21	2019		0.004334	3.71471e-05	4.99923	1.10533e-05	1.06554e-05
22	2019		0.004769	1.72119e-05	4.9995	1.12901e-05	8.08656e-06
23	2019		0.004458	9.18812e-06	5.00037	1.15325e-05	7.15266e-06
24	2019		0.003847	5.46361e-06	5.00029	1.17757e-05	7.05516e-06
25	2019		0.004534	3.86483e-06	5.0008	1.20234e-05	7.2038e-06
26	2019		0.003878	3.17556e-06	4.99912	1.22695e-05	7.35392e-06
27	2019		0.003456	3.09814e-06	5.00003	1.25218e-05	7.50171e-06
28	2019		0.003275	3.18879e-06	5.00071	1.27792e-05	7.65833e-06
29	2019		0.003278	3.21694e-06	4.99966	1.30358e-05	7.8102e-06
30	2019		0.002863	3.27211e-06	5.00074	1.32962e-05	7.96804e-06
31	2019		0.002839	3.27083e-06	4.99817	1.35595e-05	8.12509e-06
1	2019	9	0.1779	1.86265	2.92312	0.149181	0.3616
2	2019		0.05372	1.75162	3.86736	0.165963	0.329426
3	2019		0.01736	1.65877	4.82831	0.167677	0.268351
4	2019		0.007731	1.18885	4.93144	0.101623	0.19118
5	2019		0.004751	0.610008	4.97702	0.0642652	0.0991263
6	2019		0.005644	0.31232	3.99679	0.0679392	0.0497907
7	2019		0.01354	0.399451	1.98315	0.176688	0.0792576
8	2019		0.0175	0.375992	0.979497	0.192725	0.082672
9	2019		0.006123	0.131732	2.99796	0.0769904	0.0323991
10	2019		0.0714	3.17558	0	0.236993	0.572382
11	2019		0.01677	3.02154	0.928272	0.247631	0.451989
12	2019		0.007871	2.266	1.9719	0.103183	0.341737
13	2019		0.004779	1.28528	2.99584	0.0337607	0.190382
14	2019		0.005156	0.630783	2.99902	0.0107053	0.092193
15	2019		0.003827	0.280173	3.00013	0.0332978	0.0420683
16	2019		0.003617	0.129084	3.00024	0.00617263	0.0192827
17	2019		0.117	5.36364	0	0.240484	0.95679
18	2019		0.02897	5.76906	0	0.199999	0.946861
19	2019		0.01133	5.05868	0.927356	0.09911	0.804465
20	2019		0.006947	3.2588	1.97094	0.0406684	0.475992
21	2019		0.005038	1.83237	1.99663	0.0155784	0.259142
22	2019		0.004196	0.898673	2.99834	0.00607942	0.126774
23	2019		0.003621	0.417766	2.9998	0.00248614	0.0589092
24	2019		0.003415	0.190777	3.00045	0.00106048	0.0267475
25	2019		0.003518	0.0832689	2.99978	0.000467174	0.0120018
26	2019		0.002855	0.036956	2.99994	0.000212752	0.0053634
27	2019		1.332	9.8536	0	0.13225	1.74046
28	2019		0.3117	11.1025	0	0.108611	1.95835
29	2019		0.4139	10.064	0.946004	0.160958	1.78854
30	2019		0.1276	10.7214	0	0.134517	1.88305
1	2019	10	0.0535	9.86284	0	0.135557	1.634
2	2019		0.02715	7.84394	0	0.160886	1.26654
3	2019		0.02024	4.47237	0.884639	0.262876	0.669627
4	2019		0.009356	3.79658	1.96571	0.109753	0.555076
5	2019		6.204	6.33552	0	0.0723659	1.1214
6	2019		1.961	8.92402	0	0.105884	1.59889
7	2019		0.5538	11.0704	0	0.0992093	1.96977
8	2019		0.2075	11.7972	0	0.0640339	2.04708
9	2019		0.09473	10.7213	0.956911	0.0412356	1.79237
10	2019		0.2081	6.09015	11.9022	0.153728	1.04784
11	2019		0.08258	5.32592	3.958	0.113274	0.903305
12	2019		0.05576	3.25884	2.98277	0.105923	0.529717
13	2019		0.04095	1.82246	3.99369	0.0267998	0.30412
14	2019		0.03802	0.83533	4.99859	0.00705343	0.136776
15	2019		0.03786	0.357677	5.99797	0.00204977	0.0587569
16	2019		0.03929	0.15112	6.00061	0.00932937	0.0253222
17	2019		0.05574	0.4618	3.99715	0.0568529	0.0787386
18	2019		0.04482	0.160131	4.99942	0.0163178	0.0262625
19	2019		0.04375	0.0609788	6	0.00449471	0.00974603
20	2019		0.04412	0.0245595	5.99953	0.00100971	0.00390612
21	2019		0.04478	0.0102869	5.99898	0.000255855	0.00163169
22	2019		0.04496	0.00437374	6.0007	7.55044e-05	0.000696864
23	2019		0.04529	0.00191487	6.00043	2.63221e-05	0.000301299
24	2019		0.04503	0.000826866	5.99909	1.07567e-05	0.000131394
25	2019		0.04467	0.000362224	6.0008	5.18463e-06	5.79092e-05
26	2019		0.04432	0.000157603	6.00118	3.12855e-06	2.59712e-05
27	2019		0.04401	7.43202e-05	5.99874	0	1.35728e-05
28	2019		0.04334	3.29543e-05	6.00068	0	6.70837e-06
29	2019		0.04267	1.46907e-05	5.99997	0	3.7432e-06
30	2019		0.042	6.79288e-06	5.99923	0	2.46776e-06
31	2019		0.04123	3.30969e-06	6.00179	0	1.91844e-06
1	2019	11	0.04052	1.78153e-06	5.99841	0	1.72926e-06
2	2019		0.07473	0.591326	2.9969	0.0642591	0.104868
3	2019		0.04727	0.251951	4.99984	0.0248033	0.0405717
4	2019		0.4656	2.31655	0	0.0747244	0.40022
5	2019		0.1384	2.27635	0.992661	0.0738516	0.388283
6	2019		0.07311	1.61318	2.9984	0.0396409	0.267386
7	2019		0.05414	0.878424	3.99983	0.0157043	0.141116
8	2019		0.04708	0.42358	5.00035	0.00618284	0.0663272
9	2019		0.1012	1.4662	1.99573	0.0823795	0.243833
10	2019		0.05935	0.76933	3.99778	0.0377937	0.12358
11	2019		0.0499	0.346526	4.99842	0.0108203	0.0540897
12	2019		0.08971	1.34435	2.99318	0.0791258	0.216361
13	2019		1.055	3.42176	0	0.073372	0.594721
14	2019		0.2697	3.76705	0.991328	0.0870738	0.649727
15	2019		0.1254	3.0172	2.99412	0.0495359	0.507912
16	2019		0.08491	1.82519	3.99933	0.0221231	0.305198
17	2019		0.07122	0.915428	5.99993	0.00931029	0.150746
18	2019		0.06607	0.422882	5.99988	0.00389773	0.0687227
19	2019		0.06425	0.186446	6.0005	0.00164829	0.0303538
20	2019		0.0637	0.0809458	7.00077	0.000704801	0.0132057
21	2019		0.06351	0.0352999	6.99985	0.000304159	0.0057187
22	2019		0.06347	0.0152285	7.00061	0.00013239	0.0024855
23	2019		0.06323	0.00667207	6.99972	5.8209e-05	0.00108272
24	2019		0.06287	0.00291975	7.00115	2.61047e-05	0.000473493
25	2019		0.0624	0.0012776	7.00009	1.20879e-05	0.00020774
26	2019		0.06182	0.000566909	7.00024	5.96115e-06	9.15704e-05
27	2019		0.06116	0.000251125	7.00008	3.28336e-06	4.0725e-05
28	2019		0.0603	0.000110712	7.00011	0	1.84341e-05
29	2019		0.05942	4.91635e-05	7.00054	0	8.64842e-06
30	2019		0.06994	0.259151	6.99839	0.0289269	0.04157
1	2019	12	0.06015	0.0696561	7.00025	0.00678858	0.0111815
2	2019		0.06196	0.0599065	5.99999	0.0142229	0.0094016
3	2019		0.05814	0.015878	7.00138	0.00297613	0.00244063
4	2019		0.05718	0.004862	6.9995	0.000923821	0.000744886
5	2019		0.05657	0.00172107	6.99928	0.000265158	0.000265567
6	2019		0.06525	0.277068	5.99901	0.0267844	0.0415425
7	2019		0.1095	1.46076	3.99755	0.0700998	0.235498
8	2019		0.4619	2.71122	0.99754	0.0769016	0.463815
9	2019		0.1606	2.38328	2.99658	0.070684	0.397165
10	2019		0.1024	1.43772	4.9981	0.036056	0.235211
11	2019		0.08542	0.712845	6.99973	0.0150943	0.119047
12	2019		0.08117	0.312558	7.99933	0.00536711	0.0523735
13	2019		0.08177	0.132839	8.00008	0.00196605	0.0221941
14	2019		0.08415	0.0558829	9.00068	0.000733781	0.00933491
15	2019		0.09064	0.0222313	9.00106	0.000274156	0.00360349
16	2019		0.1074	0.00824518	7.9984	9.72373e-05	0.00136755
17	2019		0.1226	0.00317201	6.9992	3.67047e-05	0.000533295
18	2019		0.132	0.00128192	7.00056	1.49762e-05	0.000218154
19	2019		0.1378	0.000534608	6.99988	6.51945e-06	9.17191e-05
20	2019		0.141	0.000228526	7.0019	3.05359e-06	3.93436e-05
21	2019		0.3011	2.19488	3.99769	0.0611185	0.371362
22	2019		0.1928	1.00373	5.99835	0.0240966	0.17085
23	2019		0.1702	0.430662	6.99749	0.0073647	0.072695
24	2019		0.1636	0.183657	7.00104	0.002503	0.0311212
25	2019		0.1667	0.10123	6.9986	0.00558083	0.0170521
26	2019		0.1931	0.5045	7.00079	0.0200913	0.084393
27	2019		0.1782	0.159127	7.0016	0.00539799	0.0266879
28	2019		0.1769	0.0594668	8.00175	0.00160624	0.0100692
29	2019		0.1785	0.0240624	8.00135	0.000504785	0.00409664
30	2019		0.1799	0.0101072	8.00342	0.000163864	0.00172614
31	2019		0.1856	0.0280933	8.00083	0.00301824	0.00471693
