# Supplementary material for: Towards a multi-basin SWAT model for the migration of nutrients and pesticides to Puck Bay (Southern Baltic Sea)
Source: PeerJ. 2021 Feb 25;9:e10938. doi: 10.7717/peerj.10938 (PMC7916535; doi:10.7717/peerj.10938)
Supplement: Data S3 [file peerj-09-10938-s006.xls]

## Sheet: water balance
S1
year	precipitation	surface runoff	infiltration	evapotranspiration	biogen in surface runoff
	PREC	SURQ	PERCOLATE	ET	NO3 surQ	Norganic	Psoluble	Porganic
	mm	mm	mm	mm	kg/ha	kg/ha	kg/ha	kg/ha
2010	851.63	218.16	126.93	451.13	2.01	31.92	0.12	3.93
2011	757.69	165.21	154.81	486.05	1.58	7.64	0.1	0.94
2012	783.48	170.4	173.7	430.79	0.92	48.61	0.1	5.94
2013	634.67	125.91	144.58	390.73	1.39	23.37	0.08	2.87
2014	582.91	78.86	75.41	419.32	0.66	8.37	0.05	1.02
2015	662.96	121.69	132.83	402.55	1	34.41	0.08	4.19
2016	810.46	186.8	185.55	432.99	1.81	24.22	0.1	2.98
2017	978.54	229.51	286.51	451.65	1.92	15.36	0.15	1.89
2018	505.76	82.49	102.45	358.62	0.41	17.87	0.05	2.17
2019	690.24	132.63	145.38	386.55	1.37	16.37	0.08	2
S2
year	precipitation	surface runoff	infiltration	evapotranspiration	biogen in surface runoff
	PREC	SURQ	PERCOLATE	ET	NO3 surQ	Norganic	Psoluble	Porganic
	mm	mm	mm	mm	kg/ha	kg/ha	kg/ha	kg/ha
2010	851.63	218.16	126.93	451.13	4.06	31.7	0.09	3.92
2011	757.69	164.94	153.55	487.58	1.3	7.43	0.08	0.92
2012	783.48	170.41	173.7	430.78	6.13	47.64	0.08	5.84
2013	634.67	125.92	144.61	390.69	6.35	23.18	0.06	2.86
2014	582.91	78.82	75.3	419.49	0.78	8.17	0.04	1
2015	662.96	121.69	132.81	402.54	8.54	33.71	0.06	4.12
2016	810.46	186.8	185.55	433	2.87	23.99	0.09	2.96
2017	978.54	229.42	286.08	452.18	1.88	15	0.12	1.86
2018	505.76	82.48	102.46	358.6	0.73	17.54	0.04	2.14
2019	690.24	133.55	146.53	384.51	3.82	16.53	0.06	2.03
S13
year	precipitation	surface runoff	infiltration	evapotranspiration	biogen in surface runoff
	PREC	SURQ	PERCOLATE	ET	NO3 surQ	Norganic	Psoluble	Porganic
	mm	mm	mm	mm	kg/ha	kg/ha	kg/ha	kg/ha
2010	851.63	227.44	140.24	428.29	2.27	30.78	0.14	3.72
2011	757.69	181.87	169.93	454.67	1.71	40.78	0.1	4.94
2012	783.48	163.36	169.29	441.61	1.2	39.52	0.09	4.79
2013	634.67	133.07	162.34	365.88	1.57	35.47	0.08	4.3
2014	582.91	93.95	98.77	378.93	1.06	24.31	0.06	2.94
2015	662.96	115.69	131.26	412.06	1.54	32.95	0.07	3.98
2016	810.46	190.78	191.94	422.58	1.83	31.42	0.11	3.8
2017	978.54	242.34	303.91	421.51	2.28	40.81	0.14	4.93
2018	505.76	82.75	102.69	353.69	0.77	17.82	0.05	2.14
2019	690.24	142.91	165.25	360.81	2.07	24.69	0.09	2.97
S9
year	precipitation	surface runoff	infiltration	evapotranspiration	biogen in surface runoff
	PREC	SURQ	PERCOLATE	ET	NO3 surQ	Norganic	Psoluble	Porganic
	mm	mm	mm	mm	kg/ha	kg/ha	kg/ha	kg/ha
2010	851.63	204.61	120.1	471.28	1.04	23.18	0.12	2.85
2011	757.69	173.14	159.44	473.89	0.96	31.2	0.09	3.84
2012	783.48	162.51	165.43	446.81	0.74	29.97	0.09	3.69
2013	634.67	120.27	139.51	402.03	0.84	29.49	0.07	3.63
2014	582.91	81.3	76.99	416.13	0.65	16.46	0.05	2.02
2015	662.96	110.33	119.96	425.49	0.65	22.97	0.07	2.83
2016	810.46	183.97	181.82	439.5	1.14	24.82	0.11	3.06
2017	978.54	238.02	295.11	434.65	1.16	32.22	0.14	3.98
2018	505.76	70.75	101.84	380.55	0.39	12.15	0.05	1.49
2019	690.24	128.98	130.2	395.79	0.9	18.06	0.08	2.22
S10
year	precipitation	surface runoff	infiltration	evapotranspiration	biogen in surface runoff
	PREC	SURQ	PERCOLATE	ET	NO3 surQ	Norganic	Psoluble	Porganic
	mm	mm	mm	mm	kg/ha	kg/ha	kg/ha	kg/ha
2010	851.63	205.26	122.63	468.1	3.61	21.1	0.1	2.59
2011	757.69	173.6	162.89	469.97	1.27	28.75	0.09	3.53
2012	783.48	162.57	165.94	446.24	2.11	27.64	0.08	3.4
2013	634.67	120.39	140.3	401.08	1.26	28.24	0.06	3.47
2014	582.91	81.22	77.18	415.99	5.65	14.84	0.04	1.82
2015	662.96	109.85	119.22	426.77	1.45	20.15	0.06	2.48
2016	810.46	184.06	182.98	438.24	1.56	22.35	0.09	2.75
2017	978.54	237.8	296.33	433.66	3.74	29.03	0.12	3.57
2018	505.76	69.52	101.91	382.54	0.43	10.61	0.04	1.3
2019	690.24	129.06	130.08	395.01	10.52	16.19	0.07	1.99
S5
year	precipitation	surface runoff	infiltration	evapotranspiration	biogen in surface runoff
	PREC	SURQ	PERCOLATE	ET	NO3 surQ	Norganic	Psoluble	Porganic
	mm	mm	mm	mm	kg/ha	kg/ha	kg/ha	kg/ha
2010	851.63	224.52	130.58	440.9	1.75	70.94	0.15	8.62
2011	757.69	183.28	162.88	460.34	1.19	56.16	0.1	6.83
2012	783.48	170.54	174.67	429.51	1.23	61.83	0.1	7.51
2013	634.67	127.27	148.4	385.71	1.48	48.65	0.09	5.91
2014	582.91	87.74	82.48	402.81	1.1	34.43	0.06	4.18
2015	662.96	122.22	135.41	399.94	1.29	48.92	0.08	5.92
2016	810.46	196.23	187.18	421.91	2.04	62.83	0.13	7.6
2017	978.54	247.48	303.45	416.84	1.81	76.78	0.17	9.3
2018	505.76	83.74	103.16	353.02	0.46	23.9	0.05	2.89
2019	690.24	139.38	152.07	376.75	1.46	49.02	0.11	5.94
S6
year	precipitation	surface runoff	infiltration	evapotranspiration	biogen in surface runoff
	PREC	SURQ	PERCOLATE	ET	NO3 surQ	Norganic	Psoluble	Porganic
	mm	mm	mm	mm	kg/ha	kg/ha	kg/ha	kg/ha
2010	851.63	224.53	130.6	440.87	1.48	68.9	0.1	8.42
2011	757.69	183.28	162.85	460.37	1.72	54.93	0.08	6.72
2012	783.48	170.54	174.67	429.51	1.86	60.48	0.08	7.39
2013	634.67	127.28	148.44	385.66	1.42	47.36	0.06	5.8
2014	582.91	87.75	82.5	402.76	1.91	33.24	0.04	4.06
2015	662.96	122.23	135.43	399.93	4.39	47.47	0.06	5.79
2016	810.46	196.23	187.18	421.9	2.86	61.05	0.09	7.45
2017	978.54	247.47	303.45	416.84	4.05	74.65	0.12	9.09
2018	505.76	83.69	103.14	353.11	0.65	22.93	0.04	2.8
2019	690.24	139.37	152.06	376.72	9.94	46.54	0.07	5.69
S3
year	precipitation	surface runoff	infiltration	evapotranspiration	biogen in surface runoff
	PREC	SURQ	PERCOLATE	ET	NO3 surQ	Norganic	Psoluble	Porganic
	mm	mm	mm	mm	kg/ha	kg/ha	kg/ha	kg/ha
2010	851.63	197.99	113.77	485.22	1.15	10.36	0.11	1.27
2011	757.69	164.69	147.76	493.73	1.38	6.26	0.09	0.77
2012	783.48	148.7	146.05	480.44	0.8	5.5	0.08	0.68
2013	634.67	113	122.46	428.29	1.02	4.56	0.07	0.57
2014	582.91	76.91	68.57	426.92	0.6	2.79	0.05	0.35
2015	662.96	100.95	104.21	450.32	0.72	3.67	0.06	0.46
2016	810.46	171.65	173.73	459.87	1.15	6.69	0.1	0.83
2017	978.54	229.06	281	457.76	1.57	9.99	0.14	1.24
2018	505.76	64.8	97.43	403.57	0.74	1.92	0.04	0.24
2019	690.24	115.74	108.32	418.18	1.04	4.73	0.08	0.58
S4
year	precipitation	surface runoff	infiltration	evapotranspiration	biogen in surface runoff
	PREC	SURQ	PERCOLATE	ET	NO3 surQ	Norganic	Psoluble	Porganic
	mm	mm	mm	mm	kg/ha	kg/ha	kg/ha	kg/ha
2010	851.63	190.1	106.13	500.8	15.73	9.97	0.09	1.23
2011	757.69	160.47	140.83	504.93	4.72	6.22	0.08	0.77
2012	783.48	146.85	142.68	485.61	1.97	5.53	0.07	0.69
2013	634.67	109.33	122.02	438.97	1.02	4.67	0.06	0.58
2014	582.91	70.74	57.24	443.62	0.83	2.26	0.04	0.28
2015	662.96	97.38	94.04	458.43	1.01	3.43	0.05	0.43
2016	810.46	166.37	166.49	472.28	2.23	6.44	0.09	0.81
2017	978.54	225.56	276.09	466.18	5.63	10.07	0.11	1.25
2018	505.76	62.95	97.44	409.21	1.14	1.92	0.04	0.24
2019	690.24	109.23	97.63	431.78	1.03	4.65	0.06	0.58
S7
year	precipitation	surface runoff	infiltration	evapotranspiration	biogen in surface runoff
	PREC	SURQ	PERCOLATE	ET	NO3 surQ	Norganic	Psoluble	Porganic
	mm	mm	mm	mm	kg/ha	kg/ha	kg/ha	kg/ha
2010	851.63	217.98	126.75	451.25	1.95	47.32	0.13	5.83
2011	757.69	176.2	161.01	469.17	1.17	36.27	0.11	4.47
2012	783.48	160.01	160.22	454.63	0.89	31.04	0.09	3.82
2013	634.67	125.85	145.57	389.78	1	27.82	0.08	3.43
2014	582.91	88.19	84.95	398.96	0.85	18.86	0.05	2.33
2015	662.96	112.33	123.75	422.5	0.88	21.15	0.07	2.6
2016	810.46	186.67	185.79	432.84	1.65	33.22	0.11	4.1
2017	978.54	239.14	292.23	436.67	1.61	43.31	0.15	5.34
2018	505.76	73.08	98.07	380.66	0.53	11.34	0.04	1.4
2019	690.24	131.59	137.36	387.23	1.12	24.98	0.08	3.07
S8
year	precipitation	surface runoff	infiltration	evapotranspiration	biogen in surface runoff
	PREC	SURQ	PERCOLATE	ET	NO3 surQ	Norganic	Psoluble	Porganic
	mm	mm	mm	mm	kg/ha	kg/ha	kg/ha	kg/ha
2010	851.63	217.98	126.75	451.25	3.22	46.99	0.09	5.82
2011	757.69	176.21	161	469.17	1.44	36.03	0.08	4.46
2012	783.48	160.01	160.23	454.62	1.11	30.92	0.07	3.82
2013	634.67	125.86	145.59	389.75	4.35	27.7	0.06	3.43
2014	582.91	88.19	84.95	398.96	2.64	18.68	0.05	2.33
2015	662.96	112.33	123.75	422.5	1.59	21.04	0.05	2.6
2016	810.46	186.67	185.79	432.85	1.48	33.09	0.09	4.1
2017	978.54	239.14	292.04	436.67	2.17	43.16	0.11	5.34
2018	505.76	73.07	98.07	380.69	0.46	11.27	0.04	1.4
2019	690.24	131.6	137.35	387.21	2.21	24.87	0.06	3.07
S11
year	precipitation	surface runoff	infiltration	evapotranspiration	biogen in surface runoff
	PREC	SURQ	PERCOLATE	ET	NO3 surQ	Norganic	Psoluble	Porganic
	mm	mm	mm	mm	kg/ha	kg/ha	kg/ha	kg/ha
2010	851.63	212.59	126.78	456.6	0.98	59.14	0.11	7.19
2011	757.69	178.05	164.5	463.93	0.79	54.4	0.09	6.61
2012	783.48	166.56	168.73	439.45	0.71	56.77	0.09	6.89
2013	634.67	125.83	148.75	386.79	0.62	46.75	0.07	5.68
2014	582.91	86.73	82.94	403.24	0.58	33.09	0.05	4.01
2015	662.96	116.43	128.21	413.08	0.57	43.6	0.07	5.28
2016	810.46	191.25	188.22	425.83	0.93	59.7	0.11	7.23
2017	978.54	243.61	299.46	424.72	0.99	67.26	0.14	8.14
2018	505.76	76.48	101.85	367.75	0.42	21.93	0.05	2.65
2019	690.24	136.21	144.34	381.47	0.8	52.65	0.09	6.35
S12
year	precipitation	surface runoff	infiltration	evapotranspiration	biogen in surface runoff
	PREC	SURQ	PERCOLATE	ET	NO3 surQ	Norganic	Psoluble	Porganic
	mm	mm	mm	mm	kg/ha	kg/ha	kg/ha	kg/ha
2010	851.63	212.59	126.79	456.59	1.92	57.66	0.1	7.05
2011	757.69	178.06	164.51	463.92	0.83	52.9	0.08	6.47
2012	783.48	166.56	168.74	439.44	0.88	54.94	0.08	6.72
2013	634.67	125.83	148.75	386.78	2.58	45.32	0.06	5.54
2014	582.91	86.73	82.95	403.22	1.26	31.92	0.04	3.9
2015	662.96	116.43	128.22	413.07	1.04	41.94	0.06	5.12
2016	810.46	191.25	188.23	425.82	1	57.43	0.09	7.02
2017	978.54	243.61	299.47	424.71	1.44	64.7	0.11	7.91
2018	505.76	76.48	101.85	367.74	0.37	20.99	0.04	2.56
2019	690.24	136.21	144.35	381.46	1.05	50.4	0.07	6.15
