# Supplementary material for: Towards a multi-basin SWAT model for the migration of nutrients and pesticides to Puck Bay (Southern Baltic Sea)
Source: PeerJ. 2021 Feb 25;9:e10938. doi: 10.7717/peerj.10938 (PMC7916535; doi:10.7717/peerj.10938)
Supplement: Data S4 [file peerj-09-10938-s007.xls]

## Sheet: crop yield
scenario (SWAT crop code)	S1 (CANP/WWHT/CSIL)
year	2010	2011	2012	2013	2014	2015	2016	2017	2018	2019
crop	canola	winter wheat	silage corn	canola	winter wheat	silage corn	canola	winter wheat	silage corn	canola
yield max [kg/ha]	2768.07	8046.54	6428.73	2804.32	7707.2	7101.45	2843.63	7445.71	3651.61	3038.79
yield min [kg/ha]	2768.07	6380.58	6425.48	2791.34	6791.67	6993.63	2843.62	6524.57	2379.57	2964.98
yield average [kg/ha]	2768.07	6906.83	6428.32	2800.28	7097.83	7084.11	2843.62	6775.65	2869.11	3002.52
biomass max [kg/ha]	16692.4	25965.4	8035.91	18947.8	24951.5	8876.81	16911.9	24073.3	17064.5	17737.5
biomass min [kg/ha]	16692.4	20589.5	8031.85	18860.1	21987.5	8742.03	16911.8	21095.1	15474.5	17306.7
biomass average [kg/ha]	16692.4	22287.7	8035.4	18920.5	22978.6	8855.13	16911.8	21906.9	16086.4	17525.8
scenario (SWAT crop code)	S2 (CANP/WWHT/CSIL)
year	2010	2011	2012	2013	2014	2015	2016	2017	2018	2019
crop	canola	winter wheat	silage corn	canola	winter wheat	silage corn	canola	winter wheat	silage corn	canola
yield max [kg/ha]	2768.07	6698.79	6428.73	2801.03	7123.5	7101.45	2843.63	6745.95	3651.61	3021.89
yield min [kg/ha]	2755.72	5790.22	6418.72	2780.85	6396.05	7057.16	2830.68	6247.78	3500.48	2834.28
yield average [kg/ha]	2765.95	6273.23	6425.48	2791.76	6709.84	7096.94	2839.39	6420.89	3597.91	2921.64
biomass max [kg/ha]	16692.4	21616.4	8035.91	18925.6	23061.8	8876.81	16911.9	21810.9	17064.5	17638.8
biomass min [kg/ha]	16617.9	18684.5	8023.4	18789.2	20706.7	8821.46	16834.8	20200.2	16875.6	16543.8
biomass average [kg/ha]	16679.6	20243.1	8031.84	18862.9	21722.6	8871.17	16886.6	20759.9	16997.4	17053.7
scenario (SWAT crop code)	S13 (FPEA)
year	2010	2011	2012	2013	2014	2015	2016	2017	2018	2019
yield max [kg/ha]	2489.58	2730.03	3111.08	3032.7	2712.72	3601.58	3175.32	2748.83	3552.08	2428.66
yield min [kg/ha]	2487.24	2727.83	3108.25	3030.79	2709.73	3595.86	3170.34	2745.2	3439.84	2425.95
yield average [kg/ha]	2488.38	2728.79	3109.39	3031.51	2710.88	3598.3	3172.45	2746.65	3538.51	2427
biomass max [kg/ha]	7188.48	7886.26	8992.03	8787.4	7822.03	10376.7	9168.64	7897.98	10306.6	7017.85
biomass min [kg/ha]	7188.48	7886.26	8992.03	8787.4	7822.03	10376.7	9168.64	7897.98	9992.91	7017.85
biomass average [kg/ha]	7188.48	7886.26	8992.03	8787.4	7822.03	10376.7	9168.64	7897.98	10274.5	7017.85
scenario (SWAT crop code)	S9 (BARL)
year	2010	2011	2012	2013	2014	2015	2016	2017	2018	2019
yield max [kg/ha]	8349.88	8267.95	7391.33	8457.02	8713.3	8567.45	8072.94	7895.03	8641.9	8654.3
yield min [kg/ha]	5008.94	4417.09	4778.72	4654.42	5212.57	4697.2	4338.65	4107.2	4320.01	4845.52
yield average [kg/ha]	5956.5	5608.62	5461.86	5590.31	6166.79	6009.85	5696.37	5012.13	5217.53	6024.09
biomass max [kg/ha]	20017.7	19796.5	18101.8	20285.9	20947.8	20643.3	19341.7	19216.6	20765.3	20783.8
biomass min [kg/ha]	12019.5	10579.8	11708.1	11170.3	12539.2	11324.4	10404.4	9997.21	10385.3	11645.2
biomass average [kg/ha]	14287.7	13432.2	13380.5	13414.5	14831.2	14485.9	13656.2	12201.3	12541.1	14474.8
scenario (SWAT crop code)	S10 (BARL)
year	2010	2011	2012	2013	2014	2015	2016	2017	2018	2019
yield max [kg/ha]	8402.53	8327.35	7398.55	8561.52	8819.02	8629.56	8111.53	8011.82	9239.04	8735.38
yield min [kg/ha]	8008.43	2650.79	2080.66	1788.52	8198.17	8570.08	7993.71	7992.66	6765.42	2747.72
yield average [kg/ha]	8340.41	7587.36	6712.1	7544.93	8727.05	8601.49	8044.22	8003.24	8835.98	8077.86
biomass max [kg/ha]	20144.6	19943.5	18120.6	20536.6	21202.7	20794.2	19436	19502.7	22199.9	20978.5
biomass min [kg/ha]	19212.7	6354.11	5104.99	4308.98	19719.5	20657.8	19164	19456.7	16295.1	6616.26
biomass average [kg/ha]	20004.1	18171.3	16444.1	18106	20988.2	20731.1	19283.7	19482.4	21237.3	19409.8
scenario (SWAT crop code)	S5 (CSIL)
year	2010	2011	2012	2013	2014	2015	2016	2017	2018	2019
yield max [kg/ha]	9960.7	10073.9	6428.73	11010.4	11049.8	7101.45	8785.58	6926.41	13651.6	11041.9
yield min [kg/ha]	9689.03	9415.17	6406.95	10118.2	10514.1	6848.65	8705.25	6520.76	11674.8	9555.65
yield average [kg/ha]	9853.35	9865.21	6422.86	10603.7	10781	7032.86	8766.35	6792.52	12496.9	10427.4
biomass max [kg/ha]	12450.9	12592.3	8035.91	13763	13812.3	8876.81	10982	8658.01	17064.5	13802.3
biomass min [kg/ha]	12111.3	11769	8008.68	12647.7	13142.6	8560.82	10881.6	8150.95	14593.5	11944.6
biomass average [kg/ha]	12316.7	12331.5	8028.58	13254.7	13476.3	8791.07	10957.9	8490.64	15621.1	13034.3
scenario (SWAT crop code)	S6 (CSIL)
year	2010	2011	2012	2013	2014	2015	2016	2017	2018	2019
yield max [kg/ha]	9939.39	10070	6428.73	10879.3	10850.7	7089.63	8783.17	6926.41	13379.8	10939.7
yield min [kg/ha]	9876.65	10019.3	6406.09	10384.6	10794.3	7053.14	8744.93	6912.64	13094.3	10729.8
yield average [kg/ha]	9890.84	10037.6	6426.35	10776.8	10826.3	7074.28	8772.79	6924.94	13155.7	10772.2
biomass max [kg/ha]	12424.2	12587.5	8035.91	13599.1	13563.4	8862.04	10979	8658.01	16724.7	13674.7
biomass min [kg/ha]	12345.8	12524.1	8007.61	12980.8	13492.9	8816.43	10931.2	8640.79	16367.9	13412.2
biomass average [kg/ha]	12363.6	12547	8032.93	13471	13532.8	8842.85	10966	8656.18	16444.6	13465.3
scenario (SWAT crop code)	S3 (WWHT)
year	2010	2011	2012	2013	2014	2015	2016	2017	2018	2019
yield max [kg/ha]	7614.3	7961.5	7779.14	7919.04	7702.63	8392.79	7812.02	7413.82	8458	7982.56
yield min [kg/ha]	6269.52	6331.33	6158.12	5639.67	6729.1	6619.53	6425.12	6364.87	4050.42	6406.5
yield average [kg/ha]	6800.22	6699.88	6533.65	6609.15	6992.53	7022.02	6744.64	6655.76	6180.04	6906.55
biomass max [kg/ha]	24557.5	25691	25152.5	25580.3	24936.6	27216.6	25232.7	23970.2	27259.3	25777.5
biomass min [kg/ha]	20220.4	20430.6	19911.2	18217.4	21784.9	21466.2	20753	20578.8	13054.1	20688.1
biomass average [kg/ha]	21932	21619.9	21125.4	21349.1	22637.7	22771.4	21785.1	21519.3	19917.7	22302.9
scenario (SWAT crop code)	S4 (WWHT)
year	2010	2011	2012	2013	2014	2015	2016	2017	2018	2019
yield max [kg/ha]	7489.96	7519.74	6833.16	6702.64	8349.52	7707.55	7716.08	7031.21	8435.39	8594.22
yield min [kg/ha]	5732.62	6018.11	5575	4484.73	6160.43	5985.38	6659.64	6136.53	4524.35	5956.43
yield average [kg/ha]	6606.97	6634.66	5932.48	5866.36	7586.67	6573.85	7074.52	6474.98	6590.13	7550.81
biomass max [kg/ha]	24950.9	24976.6	24564	24130.4	26945.9	27432.9	25352.2	24813.3	27209.1	28315.2
biomass min [kg/ha]	19096.7	19989	20041.2	16145.6	19881.2	21303.3	21881.2	21656	14593.7	19624.5
biomass average [kg/ha]	22009.4	22036.8	21326.3	21119.7	24484	23397.8	23244.3	22850.4	21257	24877.5
scenario (SWAT crop code)	S7 (CANP)
year	2010	2011	2012	2013	2014	2015	2016	2017	2018	2019
yield max [kg/ha]	2768.07	2834.8	2510.55	2804.32	3041.57	2566.92	2843.63	2327.33	3903.93	3040.54
yield min [kg/ha]	2768.07	2832.59	2510.55	2800.83	3041.57	2566.92	2843.62	2327.33	3077.23	3040.54
yield average [kg/ha]	2768.07	2834.73	2510.55	2803.84	3041.57	2566.92	2843.62	2327.33	3798.55	3040.54
biomass max [kg/ha]	16692.4	18020.3	16280.2	18947.8	18392.9	18023.4	16911.9	16741.5	22145.8	17747.7
biomass min [kg/ha]	16692.4	18006.3	16280.2	18924.2	18392.9	18023.4	16911.8	16741.5	17456.2	17747.7
biomass average [kg/ha]	16692.4	18019.9	16280.2	18944.6	18392.9	18023.4	16911.8	16741.5	21548.1	17747.7
scenario (SWAT crop code)	S8 (CANP)
year	2010	2011	2012	2013	2014	2015	2016	2017	2018	2019
yield max [kg/ha]	2767.58	2832.03	2510.55	2791.58	3031.89	2564.88	2843.62	2327.33	3856.26	3039.98
yield min [kg/ha]	2754.6	2822.51	2502.26	2778.13	3018.69	2553.74	2830.77	2319.38	3076.48	3030.35
yield average [kg/ha]	2764.26	2826.43	2507.47	2782.73	3027.21	2562.65	2838.94	2324.74	3766.15	3036.03
biomass max [kg/ha]	16689.5	18002.7	16280.2	18861.7	18334.4	18009.1	16911.8	16741.5	21875.4	17744.4
biomass min [kg/ha]	16611.2	17942.2	16226.5	18770.8	18254.6	17930.9	16835.4	16684.4	17451.9	17688.2
biomass average [kg/ha]	16669.5	17967.1	16260.2	18801.9	18306.1	17993.5	16884	16722.9	21364.2	17721.4
scenario (SWAT crop code)	S11 (POTA)
year	2010	2011	2012	2013	2014	2015	2016	2017	2018	2019
yield max [kg/ha]	3989.99	4071.72	4045.73	4176.69	4202.94	4100.59	4007.29	4083.35	4249.97	4155.49
yield min [kg/ha]	3989.87	4071.56	4045.65	4176.57	4202.74	4100.45	4007.14	4083.29	4249.85	4155.28
yield average [kg/ha]	3989.95	4071.66	4045.69	4176.65	4202.87	4100.55	4007.24	4083.31	4249.92	4155.42
biomass max [kg/ha]	5410.34	5552.78	5494.31	5677.23	5753.74	5615.5	5434.97	5565.79	5802.62	5661.35
biomass min [kg/ha]	5410.34	5552.78	5494.31	5677.23	5753.74	5615.5	5434.97	5565.79	5802.62	5661.35
biomass average [kg/ha]	5410.34	5552.78	5494.31	5677.23	5753.74	5615.5	5434.97	5565.79	5802.62	5661.35
scenario (SWAT crop code)	S12 (POTA)
year	2010	2011	2012	2013	2014	2015	2016	2017	2018	2019
yield max [kg/ha]	3989.99	4071.72	4045.73	4176.69	4202.94	4100.59	4007.29	4083.35	4249.97	4155.49
yield min [kg/ha]	3989.87	4071.56	4045.65	4176.57	4202.74	4100.45	4007.14	4083.29	4249.85	4155.28
yield average [kg/ha]	3989.95	4071.66	4045.69	4176.65	4202.87	4100.55	4007.24	4083.31	4249.92	4155.42
biomass max [kg/ha]	5410.34	5552.78	5494.31	5677.23	5753.74	5615.5	5434.97	5565.79	5802.62	5661.35
biomass min [kg/ha]	5410.34	5552.78	5494.31	5677.23	5753.74	5615.5	5434.97	5565.79	5802.62	5661.35
biomass average [kg/ha]	5410.34	5552.78	5494.31	5677.23	5753.74	5615.5	5434.97	5565.79	5802.62	5661.35
